# Supplementary material for: Pd-Catalyzed asymmetric decarboxylation for the construction of spiro[4.5]deca-6,9-dien-8-ones featuring vicinal quaternary carbons
Source: Royal Society of Chemistry journal article supplement (doi:10.1039/d2qo00831a), 2022-01-01

Supporting Information for

**Pd-Catalyzed Asymmetric Decarboxylation for the Construction of Spiro[4.5]deca-6,9-dien-8-ones Featuring Vicinal Quaternary Carbon Stereocenters**

Haiyu Sun,<sup>†</sup> Yicheng He,<sup>†</sup> and Wusheng Guo<sup>\*,†</sup>

<sup>†</sup>Frontier Institute of Science and Technology (FIST), Xi'an Jiaotong University, Yanxiang Road 99, Xi'an 710045, China

E-mail: [wusheng.guo@mail.xjtu.edu.cn](mailto:wusheng.guo@mail.xjtu.edu.cn)

TABLE OF CONTENTS

|                                                                      |     |
|----------------------------------------------------------------------|-----|
| 1. General Information                                               | S2  |
| 2. Preparation of <i>para</i> -Quinone Methides ( <i>p</i> -QMs)     | S2  |
| 3. Preparation of Vinyl Methylene Cyclic Carbonate (VMCC)            | S2  |
| 4. Preparation of Ligands                                            | S2  |
| 5. General Procedure for the Optimization of the Reaction Conditions | S7  |
| 6. Synthetic Transformations and Gram-Scale Synthesis of Product 3a. | S31 |
| 7. Methods for the Crystallization of Products 3a and <i>epi</i> -3a | S35 |
| 8. Crystal Data of 3a                                                | S36 |
| 9. Crystal Data of <i>epi</i> -3a                                    | S45 |
| 10. References                                                       | S56 |
| 11. NMR Spectra                                                      | S57 |

## 1. General Information

Commercially available reagents and solvents were purchased from Energy, J&K, TCI, aladdin or Daicel, and used without further purification.  $^1\text{H}$  NMR,  $^{13}\text{C}$  NMR,  $^{31}\text{P}$  NMR and  $^{19}\text{F}$  NMR spectra were recorded at room temperature on a Bruker AV-400 spectrometer and referenced to the residual deuterated solvent signals ( $\text{CDCl}_3$   $^1\text{H}$  NMR,  $\delta = 7.26$ ;  $^{13}\text{C}$  NMR,  $\delta = 77.16$ ). All reported NMR values are given in parts per million (ppm). FT-IR measurements were carried out on a Thermo Fisher Nicolet 6700 FT-IR spectrometer or Bruker ALPHA II. High resolution mass spectra (HRMS) were obtained on a WATERS I-Class VION IMS Qtof Spectrometer. The X-ray analysis of **3a** and **7** was collected on Bruker D8 Quest diffractometer. Optical rotations were recorded on a polarimeter with a sodium lamp of wavelength 589 nm. Enantiomeric excesses were determined by chiral High Performance Liquid Chromatography (HPLC) analysis. UV detection was monitored at 250 nm. HPLC samples were dissolved in HPLC grade isopropanol (IPA) unless otherwise stated.

## 2. Preparation of *para*-Quinone Methides (*p*-QMs).

The *para*-quinone methides (**2a-2o**) were prepared according to the previously reported procedure.<sup>[1]</sup>

## 3. Preparation of Vinyl Methylene Cyclic Carbonates.

The vinyl methylene cyclic carbonates **1** was prepared according to our previously reported method.<sup>[2]</sup>

## 4. Preparation of Chiral Ligands.

Chiral ligands **L1-L11** were purchased from chemical suppliers. The general procedure for the preparation of ligands **L12-L24** is described as follows with the use **L12** as an example.

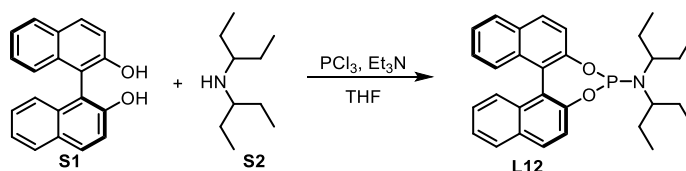

The triethylamine (5.0 eq.) was added dropwise to a stirred ice-cooled solution of  $\text{PCl}_3$  (0.087 g, 1.0 eq.) in THF (5 mL). The ice bath was removed and the solution left to warm to room temperature before amine **S1** (0.1 g, 1.0 eq.) was added to the stirring solution. After additional 5 hours of stirring, binaphthol (0.18 g, 1.0 eq.) was added to the suspension and the subsequent mixture was left to stir for an additional 18 h. The solution was then filtered on a small pad of celite and rinsed with DCM. The resulting solution was concentrated under reduced pressure to afford a yellow residue. After flash column chromatography, the ligand **L12** was obtained as a white solid (0.15 g, 50% yield).

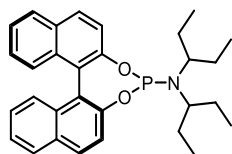

**Ligand L12** : purified by column chromatography (petroleum ether/ethyl acetate = 100:1); white solid ;  $[\alpha]_D^{20} = +333.9$  ( $c = 0.25$ ,  $\text{CHCl}_3$ );  $^1\text{H NMR}$  (400 MHz,  $\text{CDCl}_3$ )  $\delta$  7.93 (d,  $J = 8.8$  Hz, 1H), 7.88 (dd,  $J = 8.2, 6.7$  Hz, 3H), 7.47 (d,  $J = 8.8$  Hz, 1H), 7.43 (d,  $J = 8.8$  Hz, 1H), 7.41 - 7.34 (m, 3H), 7.29 - 7.22 (m, 2H), 7.22 - 7.16 (m, 1H), 2.89 - 2.68 (m, 2H), 1.81 - 1.75 (m, 2H), 1.69 - 1.39 (m, 6H), 0.89 (t,  $J = 7.4$  Hz, 6H), 0.81 - 0.74 (m, 6H).  $^{31}\text{P NMR}$  (162 MHz,  $\text{CDCl}_3$ )  $\delta$  148.53.  $^{13}\text{C NMR}$  (100 MHz,  $\text{CDCl}_3$ )  $\delta$  150.5, 150.5, 150.1, 133.0, 132.9, 131.4, 130.4, 130.3, 129.5, 128.4, 128.2, 127.2, 126.0, 125.9, 124.7, 124.3, 124.2, 124.1, 122.6, 122.5, 122.4, 121.98, 121.95, 57.8, 57.7, 29.5, 11.90, 11.89, 11.8. **IR**  $\nu_{\text{max}}/\text{cm}^{-1}$  2962, 2930, 2872, 1587, 1460, 1230, 1015, 989, 816, 747. **HRMS** (ESI):  $m/z$   $[\text{M}+\text{H}]^+$  calculated for  $[\text{C}_{30}\text{H}_{35}\text{O}_2\text{NP}]^+$ : 472.2405, found:472.2415.

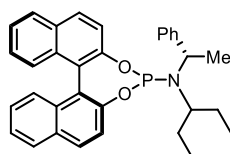

**Ligand L14** : purified by column chromatography (petroleum ether/ethyl acetate = 100:1); white solid ;  $[\alpha]_D^{20} = +179.3$  (  $c = 0.24$ ,  $\text{CHCl}_3$ );  $^1\text{H NMR}$  (400 MHz,  $\text{CDCl}_3$ )  $\delta$  7.94 (d,  $J = 8.8$  Hz, 1H), 7.87 (d,  $J = 8.2$  Hz, 1H), 7.82 (d,  $J = 8.2$  Hz, 1H), 7.77 (d,  $J = 8.8$  Hz, 1H), 7.55 (d,  $J = 7.6$  Hz, 2H), 7.51 (d,  $J = 8.8$  Hz, 1H), 7.41 - 7.31 (m, 5H), 7.30 - 7.24 (m, 3H), 7.23 - 7.13 (m, 2H), 4.54 - 4.38 (m, 1H), 2.95 - 2.76 (m, 1H), 1.66 (d,  $J = 7.0$  Hz, 3H), 1.56 - 1.41 (m, 2H), 1.37 - 1.16 (m, 2H), 0.92 (t,  $J = 7.4$  Hz, 3H), 0.33 (t,  $J = 7.4$  Hz, 3H).  $^{31}\text{P NMR}$  (162 MHz,  $\text{CDCl}_3$ )  $\delta$  147.60.  $^{13}\text{C NMR}$  (100 MHz,  $\text{CDCl}_3$ )  $\delta$  150.4, 149.9, 145.6, 133.0, 132.8, 131.4, 130.5, 130.4, 129.6, 128.4, 128.3, 128.2, 127.9, 127.6, 127.2, 126.9, 126.1, 125.9, 124.8, 124.4, 124.2, 122.5, 122.4, 121.8, 58.2, 54.0, 53.9, 29.7, 29.6, 11.6, 11.5. **IR**  $\nu_{\text{max}}/\text{cm}^{-1}$  2962, 2932, 2872, 1260, 1089, 1018, 938, 817, 746, 696. **HRMS** (ESI):  $m/z$   $[\text{M}+\text{H}]^+$  calculated for  $[\text{C}_{33}\text{H}_{33}\text{O}_2\text{NP}]^+$ : 506.2249, found:506.2252.

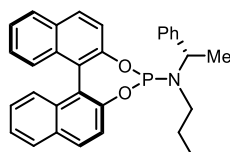

**Ligand L15**: purified by column chromatography (petroleum ether/ethyl acetate = 100:1); white solid ;  $[\alpha]_D^{20} = +203.3$  (  $c = 0.25$ ,  $\text{CHCl}_3$ );  $^1\text{H NMR}$  (400 MHz,  $\text{CDCl}_3$ )  $\delta$  7.96 (d,  $J = 8.8$  Hz, 1H), 7.89 (d,  $J = 8.2$  Hz, 1H), 7.82 (d,  $J = 8.2$  Hz, 1H), 7.74 (d,  $J = 8.8$  Hz, 1H), 7.55 (d,  $J = 8.8$  Hz, 1H), 7.50 (d,  $J = 7.4$  Hz, 2H), 7.45 - 7.27 (m, 7H), 7.25 - 7.17 (m, 2H), 7.13 (d,  $J = 8.8$  Hz, 1H), 4.61 - 4.47 (m, 1H), 2.66 - 2.48 (m, 1H), 2.38 - 2.21 (m, 1H), 1.74 (dd,  $J = 7.2, 2.4$  Hz, 3H), 1.33 - 1.21 (m, 1H), 1.16 - 1.01 (m, 1H), 0.42 (t,  $J = 7.4$  Hz, 3H).  $^{31}\text{P NMR}$  (162 MHz,  $\text{CDCl}_3$ )  $\delta$  147.86.  $^{13}\text{C NMR}$  (100 MHz,  $\text{CDCl}_3$ )  $\delta$  150.65, 150.60, 149.8, 143.8, 143.8, 133.0, 132.7, 131.5, 130.6, 130.3, 129.9, 128.5, 128.4, 128.3, 127.43, 127.42, 127.3, 127.2, 127.1, 126.1, 126.0, 124.8, 124.5, 124.30, 124.25, 122.41, 122.39, 122.19, 122.17, 122.1, 77.5, 77.2, 76.8, 56.6, 56.3, 45.8, 22.7, 22.4, 22.2, 11.2. **IR**  $\nu_{\text{max}}/\text{cm}^{-1}$  2963, 2926, 2868, 1503, 1326, 1229, 1205, 1069, 940. **HRMS** (ESI):  $m/z$   $[\text{M}+\text{H}]^+$  calculated for  $[\text{C}_{31}\text{H}_{29}\text{O}_2\text{NP}]^+$ : 478.1936, found:478.1936.

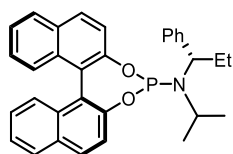

**Ligand L17:** purified by column chromatography (petroleum ether/ethyl acetate = 100:1); white solid ;  $[\alpha]_D^{20} = +199.4$  ( $c = 0.29$ ,  $\text{CHCl}_3$ );  $^1\text{H NMR}$  (400 MHz,  $\text{CDCl}_3$ )  $\delta$  7.97 (d,  $J = 8.8$  Hz, 1H), 7.91 (d,  $J = 8.0$  Hz, 1H), 7.85 (d,  $J = 8.0$  Hz, 1H), 7.77 (d,  $J = 8.8$  Hz, 1H), 7.59 (d,  $J = 7.6$  Hz, 2H), 7.54 (t,  $J = 6.8$  Hz, 1H), 7.42-7.36 (m, 5H), 7.32 - 7.25 (m, 2H), 7.25 - 7.21 (m, 3H), 4.15 - 3.95 (m, 1H), 3.52 - 3.27 (m, 1H), 2.35 - 2.13 (m, 1H), 2.12 - 1.85 (m, 1H), 1.07 (t,  $J = 7.2$  Hz, 3H), 0.97 (d,  $J = 6.6$  Hz, 3H), 0.64 (d,  $J = 6.8$  Hz, 3H).  $^{31}\text{P NMR}$  (162 MHz,  $\text{CDCl}_3$ )  $\delta$  149.43.  $^{13}\text{C NMR}$  (100 MHz,  $\text{CDCl}_3$ )  $\delta$  150.6, 150.2, 146.7, 133.0, 132.8, 131.5, 130.6, 130.3, 129.6, 128.5, 128.4, 127.2, 126.7, 126.1, 126.0, 124.8, 124.4, 124.2, 122.5, 122.3, 122.0, 60.8, 60.6, 46.4, 46.3, 31.9, 31.7, 22.8, 22.1, 12.3, 12.27. **IR**  $\nu_{\text{max}}/\text{cm}^{-1}$  2968, 2926, 2869, 1459, 1327, 1200, 1155, 1023, 943. **HRMS** (ESI):  $m/z$   $[\text{M}+\text{H}]^+$  calculated for  $[\text{C}_{32}\text{H}_{31}\text{O}_2\text{NP}]^+$ : 492.2092, found:492.2091.

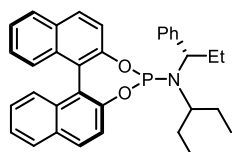

**Ligand L18 :** purified by column chromatography (petroleum ether/ethyl acetate = 100:1); white solid ;  $[\alpha]_D^{20} = +184$  ( $c = 0.25$ ,  $\text{CHCl}_3$ );  $^1\text{H NMR}$  (400 MHz,  $\text{CDCl}_3$ )  $\delta$  7.97 (d,  $J = 8.8$  Hz, 1H), 7.90 (d,  $J = 8.2$  Hz, 1H), 7.84 (d,  $J = 8.1$  Hz, 1H), 7.75 (d,  $J = 8.8$  Hz, 1H), 7.56 - 7.49 (m, 3H), 7.43 - 7.33 (m, 5H), 7.31 - 7.25 (m, 2H), 7.24 - 7.17 (m, 2H), 7.14 (d,  $J = 8.8$  Hz, 1H), 4.08 - 3.95 (m, 1H), 2.94 - 2.81 (m, 1H), 2.23 - 2.01 (m, 2H), 1.44 - 1.32 (m, 2H), 1.10 (p,  $J = 7.4$  Hz, 2H), 0.90 (t,  $J = 7.4$  Hz, 3H), 0.86 (t,  $J = 7.4$  Hz, 3H), 0.20 (t,  $J = 7.4$  Hz, 3H).  $^{31}\text{P NMR}$  (162 MHz,  $\text{CDCl}_3$ )  $\delta$  146.24.  $^{13}\text{C NMR}$  (100 MHz,  $\text{CDCl}_3$ )  $\delta$  150.3, 150.24, 149.9, 145.5, 133.0, 132.8, 131.5, 130.5, 130.3, 129.6, 128.41, 128.35, 128.2, 128.0, 127.9, 127.23, 127.19, 126.9, 126.1, 125.9, 124.8, 124.4, 124.22, 124.16, 122.51, 122.49, 122.4, 122.0, 61.5, 61.3, 58.54, 58.52, 32.0, 31.8, 29.7, 24.3, 12.52, 12.48, 11.7, 11.6. **IR**  $\nu_{\text{max}}/\text{cm}^{-1}$  2958, 2922, 2871, 1588, 1462, 1326, 1071. **HRMS** (ESI):  $m/z$   $[\text{M}+\text{H}]^+$  calculated for  $[\text{C}_{34}\text{H}_{35}\text{O}_2\text{NP}]^+$ : 520.2409, found: 520.2405.

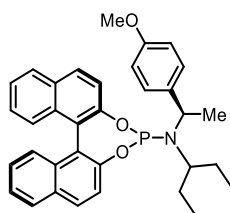

**Ligand L22** : purified by column chromatography (petroleum ether/ethyl acetate = 100:1); white solid ;  $[\alpha]_D^{20} = -132.8$  (  $c = 0.26$ ,  $\text{CHCl}_3$ );  $^1\text{H NMR}$  (400 MHz,  $\text{CDCl}_3$ )  $\delta$  7.95 (d,  $J = 8.8$  Hz, 1H), 7.89 (d,  $J = 8.0$  Hz, 1H), 7.85 (d,  $J = 8.0$  Hz, 1H), 7.79 (d,  $J = 8.8$  Hz, 1H), 7.51 (dd,  $J = 8.8, 0.6$  Hz, 1H), 7.45 (d,  $J = 8.8$  Hz, 2H), 7.40 - 7.33 (m, 3H), 7.30 (d,  $J = 8.8$  Hz, 1H), 7.27 (d,  $J = 8.4$  Hz, 1H), 7.25 - 7.17 (m, 3H), 6.95 - 6.86 (m, 2H), 4.51 - 4.36 (m, 1H), 3.83 (s, 3H), 2.90 - 2.77 (m, 1H), 1.62 (d,  $J = 7.2$  Hz, 3H), 1.52 - 1.44 (m, 2H), 1.38 - 1.25 (m, 2H), 0.93 (t,  $J = 7.4$  Hz, 3H), 0.37 (t,  $J = 7.4$  Hz, 3H).  $^{31}\text{P NMR}$  (162 MHz,  $\text{CDCl}_3$ )  $\delta$  148.03.  $^{13}\text{C NMR}$  (100 MHz,  $\text{CDCl}_3$ )  $\delta$  158.5, 150.5, 150.4, 150.0, 137.4, 133.0, 132.9, 131.4, 130.5, 130.4, 129.6, 128.9, 128.8, 128.4, 128.2, 127.3, 126.1, 125.9, 124.8, 124.4, 124.22, 124.17, 122.5, 121.8, 113.6, 113.1, 58.2, 58.1, 55.4, 53.3, 53.2, 29.7, 29.6, 11.6, 11.5. **IR**  $\nu_{\text{max}}/\text{cm}^{-1}$  2962, 2929, 2871, 1588, 1509, 1231, 939. **HRMS** (ESI):  $m/z$   $[\text{M}+\text{H}]^+$  calculated for  $[\text{C}_{34}\text{H}_{35}\text{O}_3\text{NP}]^+$ : 536.2355, found: 536.2353.

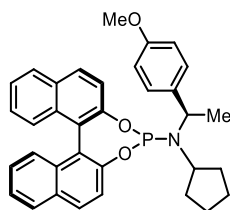

**Ligand L23**: purified by column chromatography (petroleum ether/ethyl acetate = 100:1); white solid ;  $[\alpha]_D^{20} = -100.87$  (  $c = 0.35$ ,  $\text{CHCl}_3$ );  $^1\text{H NMR}$  (400 MHz,  $\text{CDCl}_3$ )  $\delta$  7.94 (d,  $J = 8.8$  Hz, 1H), 7.87 (d,  $J = 8.4$  Hz, 1H), 7.79 (d,  $J = 8.0$  Hz, 1H), 7.67 (d,  $J = 8.8$  Hz, 1H), 7.52 (d,  $J = 8.8$  Hz, 1H), 7.44 (d,  $J = 8.8$  Hz, 2H), 7.38 - 7.25 (m, 5H), 7.21 - 7.17 (m, 2H), 6.92 (d,  $J = 8.4$  Hz, 2H), 4.45 - 4.38 (m, 1H), 3.81 (s, 3H), 3.33 - 3.22 (m, 1H), 1.86 - 1.73 (m, 2H), 1.68 - 1.52 (m, 5H), 1.57 (d,  $J = 6.8$  Hz, 3H), 1.28 - 1.12 (m, 2H).  $^{31}\text{P NMR}$  (162 MHz,  $\text{CDCl}_3$ )  $\delta$  151.13.  $^{13}\text{C NMR}$  (100 MHz,  $\text{CDCl}_3$ )  $\delta$  158.3, 150.5, 150.4, 150.1, 136.9, 132.9, 132.7, 131.4, 130.5, 130.4, 129.4, 128.4, 128.2, 127.2, 126.1, 125.9, 124.8, 124.4, 124.24, 124.18, 122.5, 122.3, 121.6, 113.6, 57.0, 56.9, 55.3, 53.1, 53.0, 34.4, 32.8, 32.7, 23.8.; **IR**  $\nu_{\text{max}}/\text{cm}^{-1}$  2954, 2865, 1508, 1461, 1229, 1203, 1176, 1035, 945. **HRMS** (ESI):  $m/z$   $[\text{M}+\text{Na}]^+$  calculated for  $[\text{C}_{34}\text{H}_{32}\text{O}_3\text{NPNa}]^+$ : 556.2012, found:556.2012.

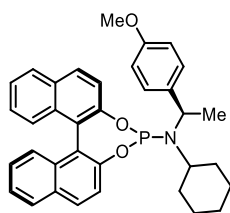

**Ligand L24:** purified by column chromatography (petroleum ether/ethyl acetate = 100:1); white solid ;  $[\alpha]_D^{20} = -127.5$  ( $c = 0.25$ ,  $\text{CHCl}_3$ );  $^1\text{H NMR}$  (400 MHz,  $\text{CDCl}_3$ )  $\delta$  7.96 (d,  $J = 8.8$  Hz, 1H), 7.90 (d,  $J = 8.0$  Hz, 1H), 7.84 (d,  $J = 8.0$  Hz, 1H), 7.76 (d,  $J = 8.8$  Hz, 1H), 7.52 (d,  $J = 8.8$  Hz, 1H), 7.48 (d,  $J = 8.6$  Hz, 2H), 7.42 - 7.27 (m, 5H), 7.25 - 7.19 (m, 2H), 6.92 (d,  $J = 8.6$  Hz, 2H), 4.52 - 4.43 (m, 1H), 3.84 (s, 3H), 2.80 - 2.59 (m, 1H), 1.92 - 1.74 (m, 1H), 1.64 (d,  $J = 7.0$  Hz, 3H), 1.59 - 1.46 (m, 4H), 1.39 - 1.27 (m, 2H), 0.93 - 0.80 (m, 2H), 0.59 - 0.49 (m, 1H).  $^{31}\text{P NMR}$  (162 MHz,  $\text{CDCl}_3$ )  $\delta$  151.43.  $^{13}\text{C NMR}$  (100 MHz,  $\text{CDCl}_3$ )  $\delta$  158.4, 150.64, 150.56, 150.1, 137.5, 133.0, 132.8, 131.4, 130.5, 130.3, 129.6, 128.40, 128.37, 128.2, 127.2, 126.1, 125.9, 124.8, 124.4, 124.3, 124.2, 122.6, 122.2, 121.7, 113.6, 55.5, 55.4, 53.2, 53.0, 35.1, 34.1, 27.1, 26.3, 25.5, 24.5, 24.4. **IR**  $\nu_{\text{max}}/\text{cm}^{-1}$  2923, 2852, 1509, 1232, 1034, 943. **HRMS** (ESI):  $m/z$   $[\text{M}+\text{Na}]^+$  calculated for  $[\text{C}_{35}\text{H}_{34}\text{O}_3\text{NPNa}]^+$ : 570.2168, found: 570.2170.

## 5. General Procedure for the Optimization of the Reaction Conditions.

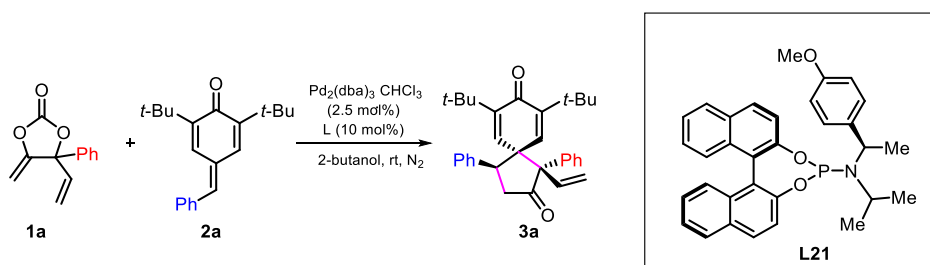

In the glovebox, to a vial equipped with a dried stir bar was added  $\text{Pd}_2(\text{dba})_3 \cdot \text{CHCl}_3$  (0.0025 mmol), ligand **L21** (0.01 mmol), anhydrous 2-Butanol (0.5 mL). The reaction mixture was then allowed to stir for 1 h at room temperature, followed by the addition of cyclic carbonate **1a** (0.10 mmol) and *para*-quinone methide **2a** (0.15 mmol). Then, the reaction mixture was allowed to stir at room temperature until the starting material disappeared (monitored by TLC) in the glovebox. The crude reaction mixture was concentrated under reduced pressure and directly purified by silica gel chromatography (petroleum ether/ethyl acetate = 50:1). The *dr* values were determined by  $^1\text{H NMR}$  analysis of crude reaction mixture. The enantiopurity of the purified product was analyzed by chiral HPLC.

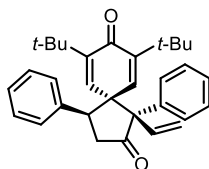

**Compound 3a:** purified by column chromatography (petroleum ether/ethyl acetate = 50:1); yellow solid, 40 mg, 79% yield,  $dr >20:1$ , 92.5:7.5 *er*,  $[\alpha]_D^{20} = -134.9$  ( $c = 0.33$ ,  $\text{CHCl}_3$ );  $^1\text{H NMR}$  (400 MHz,  $\text{CDCl}_3$ )  $\delta$  7.42 - 7.35 (m, 3H), 7.19 - 7.10 (m, 5H), 6.91 - 6.88 (m, 2H), 6.41 (d,  $J = 3.2$  Hz, 1H), 6.24 (d,  $J = 3.2$  Hz, 1H), 5.95 (dd,  $J = 17.6$ , 11.2 Hz, 1H), 5.25 (d,  $J = 11.2$  Hz, 1H), 5.13 (d,  $J = 17.6$  Hz, 1H), 3.61 (dd,  $J = 12.6$ , 8.6 Hz, 1H), 3.25 (dd,  $J = 19.6$ , 12.6 Hz, 1H), 3.09 (dd,  $J = 19.6$ , 8.6 Hz, 1H), 1.08 (s, 9H), 1.06 (s, 9H);  $^{13}\text{C NMR}$  (100 MHz,  $\text{CDCl}_3$ )  $\delta$  216.0, 185.6, 148.7, 148.6, 141.5, 138.8, 138.5, 136.7, 135.0, 129.64, 128.60, 128.4, 128.0, 127.7, 127.5, 118.7, 69.9, 55.9, 47.6, 41.5, 35.3, 35.2, 29.3, 29.0. **IR**  $\nu_{\text{max}}/\text{cm}^{-1}$  2953, 2920, 2865, 1737, 1631, 1453, 1355, 1252, 1201, 1106, 925. **HRMS** (ESI):  $m/z$   $[\text{M}+\text{H}]^+$  calculated for  $[\text{C}_{32}\text{H}_{37}\text{O}_2]^+$ : 453.2794, found:453.2796.

The *ee* was determined by HPLC analysis: CHIRALPAK ADH (4.6 mm i.d.  $\times$  250 mm); hexane/2-propanol = 97/3; flow rate 0.3 mL/min; 35 °C; 250 nm; retention time: 19.08 min (minor) and 17.54 min (major).

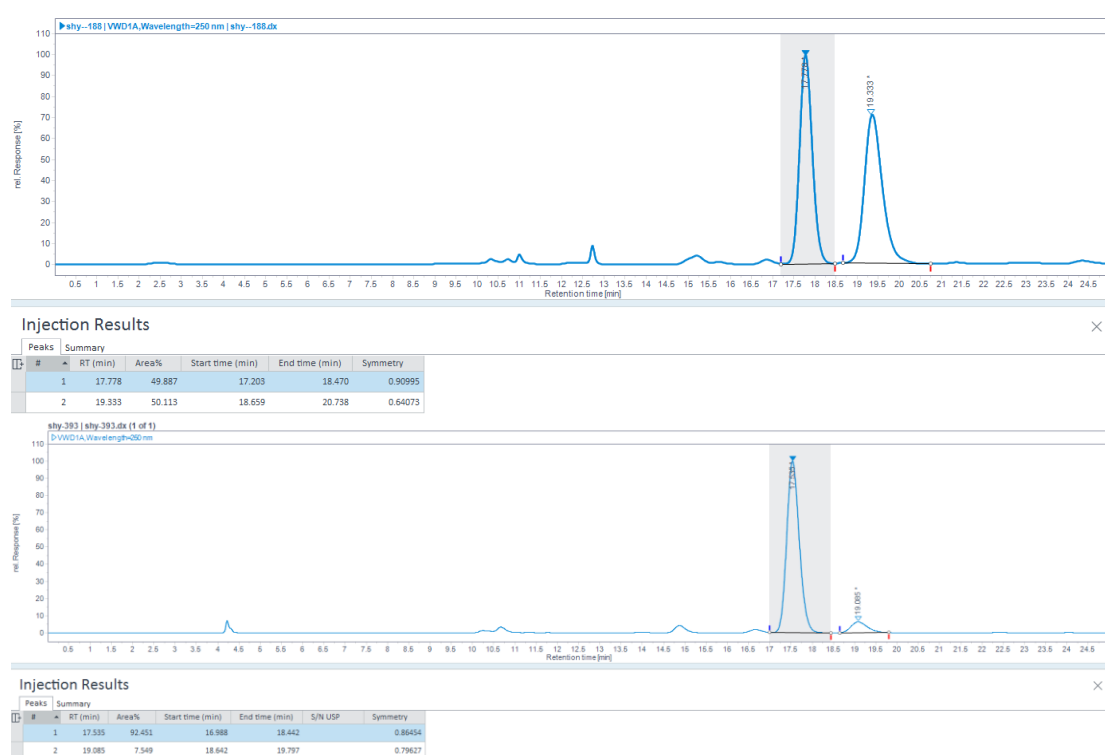



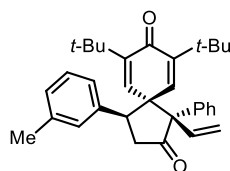

**Compound 3b**: purified by column chromatography (petroleum ether/ethyl acetate = 50:1); yellow solid, 40 mg, 85% yield, 11:1 *dr*, 91.5:8.5 *er*,  $[\alpha]_D^{20} = -127.7$  ( $c = 0.23$ ,  $\text{CHCl}_3$ );  $^1\text{H NMR}$  (400 MHz,  $\text{CDCl}_3$ )  $\delta$  7.41 - 7.33 (m, 3H), 7.18 (d,  $J = 7.2$  Hz, 2H), 7.03 (t,  $J = 7.2$  Hz, 1H), 6.95 (d,  $J = 7.2$  Hz, 1H), 6.70 (d,  $J = 8.8$  Hz, 2H), 6.41 (d,  $J = 3.0$  Hz, 1H), 6.23 (d,  $J = 3.0$  Hz, 1H), 5.94 (dd,  $J = 17.6, 11.2$  Hz, 1H), 5.25 (d,  $J = 11.2$  Hz, 1H), 5.13 (d,  $J = 17.6$  Hz, 1H), 3.58 (dd,  $J = 12.6, 8.6$  Hz, 1H), 3.25 (dd,  $J = 19.6, 12.6$  Hz, 1H), 3.07 (dd,  $J = 19.6, 8.6$  Hz, 1H), 2.21 (s, 3H), 1.08 (s, 9H), 1.06 (s, 9H).  $^{13}\text{C NMR}$  (100 MHz,  $\text{CDCl}_3$ )  $\delta$  216.1, 185.7, 148.7, 148.5, 141.7, 139.0, 138.5, 136.9, 136.7, 134.9, 129.6, 129.4, 128.41, 128.38, 128.0, 127.5, 125.7, 118.7, 69.9, 55.8, 47.6, 41.5, 35.3, 35.2, 29.3, 29.1, 21.5. **IR**  $\nu_{\text{max}}/\text{cm}^{-1}$  2956, 2919, 2866, 1742, 1630, 1367, 1258, 1093, 1013. **HRMS** (ESI):  $m/z$   $[\text{M}+\text{H}]^+$  calculated for  $[\text{C}_{33}\text{H}_{39}\text{O}_2]^+$ : 467.2945, found : 467.2935.

The *ee* was determined by HPLC analysis: CHIRALPAK ADH (4.6 mm i.d.  $\times$  250 mm); hexane/2-propanol = 97/3; flow rate 0.3 mL/min; 35 °C; 250 nm; retention time: 16.63 min (minor) and 15.01 min (major).

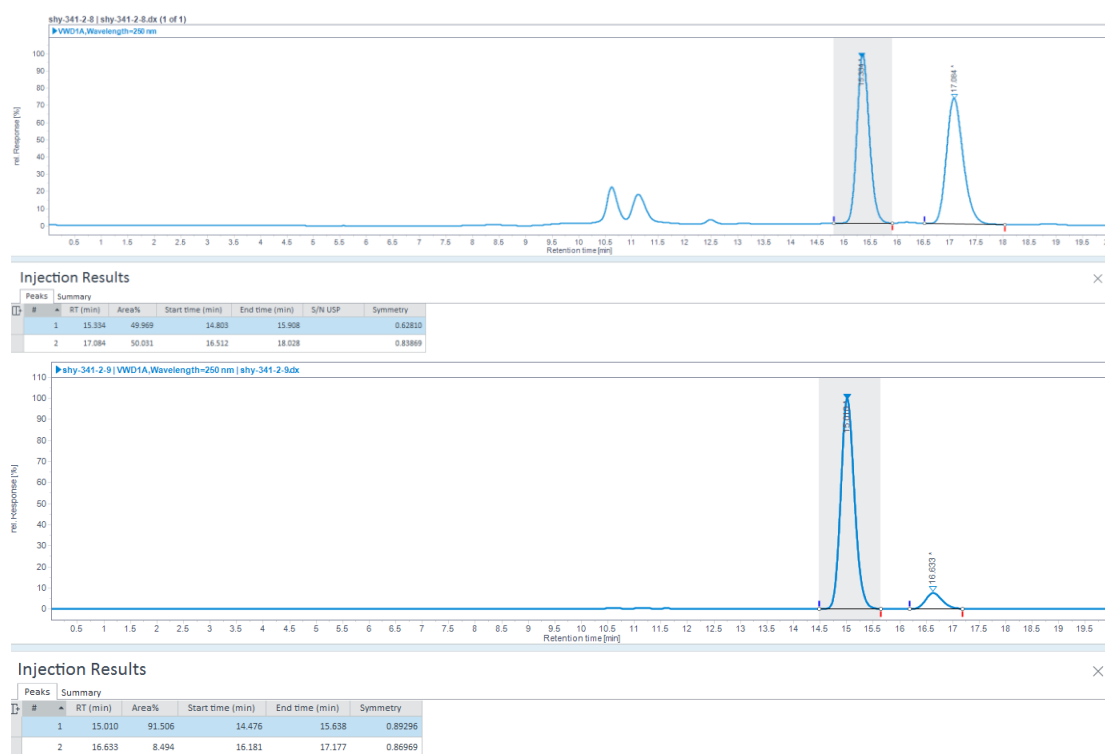

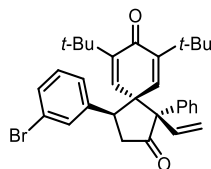

**Compound 3c:** purified by column chromatography (petroleum ether/ethyl acetate = 50:1); yellow solid, 46 mg, 81% yield, 13:1 *dr*, 94:6 *er*,  $[\alpha]_D^{20} = -96.0$  ( $c = 0.24$ ,  $\text{CHCl}_3$ );  $^1\text{H NMR}$  (400 MHz,  $\text{CDCl}_3$ )  $\delta$  7.42 - 7.34 (m, 3H), 7.28 (d,  $J = 7.2$  Hz, 1H), 7.18 - 7.16 (m, 2H), 7.04 - 7.00 (m, 2H), 6.83 (d,  $J = 7.8$  Hz, 1H), 6.38 (d,  $J = 3.2$  Hz, 1H), 6.21 (d,  $J = 3.2$  Hz, 1H), 5.93 (dd,  $J = 17.6, 11.2$  Hz, 1H), 5.26 (dd,  $J = 11.2, 0.7$  Hz, 1H), 5.13 (dd,  $J = 17.6, 0.7$  Hz, 1H), 3.56 (dd,  $J = 12.4, 8.8$  Hz, 1H), 3.19 (dd,  $J = 19.6, 12.4$  Hz, 1H), 3.08 (dd,  $J = 19.6, 8.8$  Hz, 1H), 1.08 (s, 9H), 1.06 (s, 9H).  $^{13}\text{C NMR}$  (100 MHz,  $\text{CDCl}_3$ )  $\delta$  215.2, 185.5, 149.2, 149.1, 141.0, 138.2, 137.6, 136.4, 131.7, 130.8, 129.6, 129.0, 128.5, 128.2, 127.2, 121.7, 118.9, 69.8, 55.7, 47.2, 41.3, 35.4, 35.3, 29.4, 29.1. **IR**  $\nu_{\text{max}}/\text{cm}^{-1}$  2955, 2910, 2866, 1740, 1637, 1368, 1243, 1044, 928, 783. **HRMS** (ESI):  $m/z$   $[\text{M}+\text{Na}]^+$  calculated for  $[\text{C}_{32}\text{H}_{35}\text{BrO}_2\text{Na}]^+$ : 553.1713, found: 553.1721.

The *ee* was determined by HPLC analysis: CHIRALPAK ADH (4.6 mm i.d.  $\times$  250 mm); hexane/2-propanol = 97/3; flow rate 0.3 mL/min; 35 °C; 250 nm; retention time: 19.76 min (minor) and 17.99 min (major).

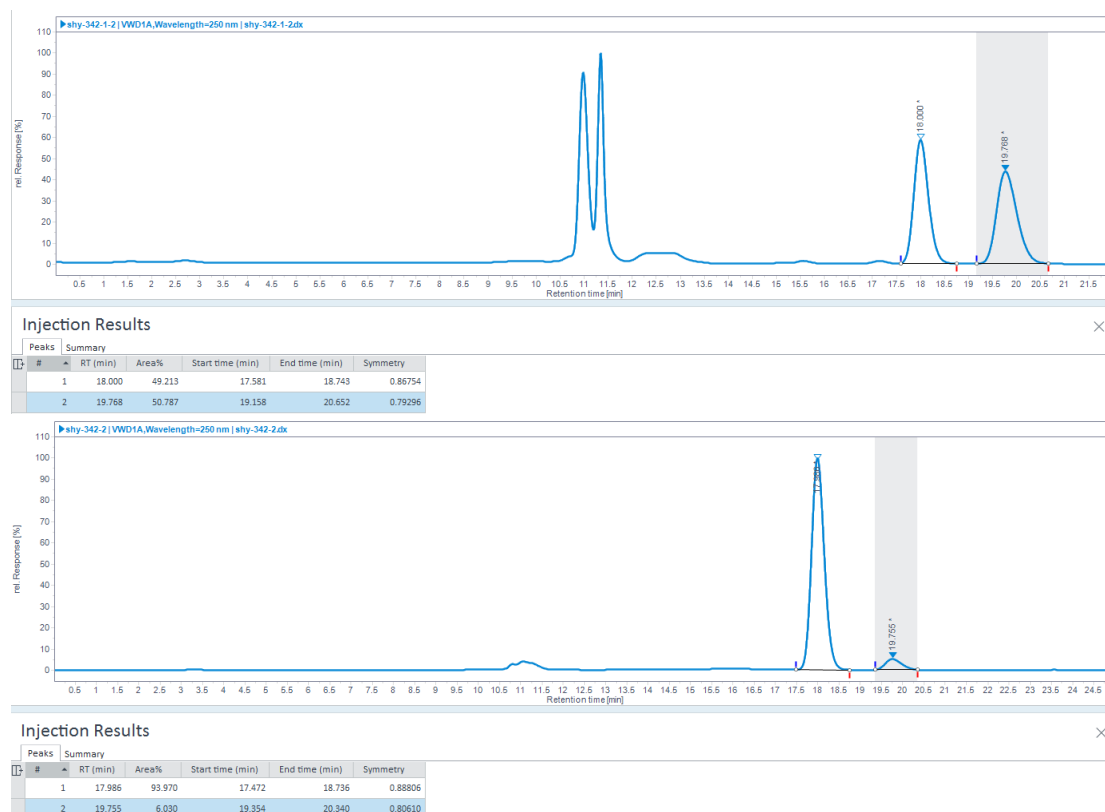

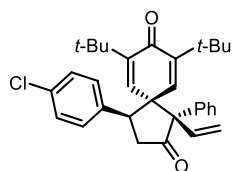

**Compound 3d** : purified by column chromatography (petroleum ether/ethyl acetate = 50:1); yellow solid, 40 mg, 77% yield, 11:1 *dr*, 89:11 *er*,  $[\alpha]_D^{20} = -68.8$  ( $c = 0.18$ ,  $\text{CHCl}_3$ );  $^1\text{H NMR}$  (400 MHz,  $\text{CDCl}_3$ )  $\delta$  7.42 - 7.35 (m, 3H), 7.18 - 7.16 (m, 2H), 7.12 (d,  $J = 8.4$  Hz, 2H), 6.84 (d,  $J = 8.4$  Hz, 2H), 6.37 (d,  $J = 3.0$  Hz, 1H), 6.21 (d,  $J = 3.0$  Hz, 1H), 5.93 (dd,  $J = 17.6, 11.2$  Hz, 1H), 5.26 (d,  $J = 11.2$  Hz, 1H), 5.13 (d,  $J = 17.6$  Hz, 1H), 3.58 (dd,  $J = 12.2, 9.0$  Hz, 1H), 3.17 (dd,  $J = 19.6, 12.2$  Hz, 1H), 3.08 (dd,  $J = 19.6, 9.0$  Hz, 1H), 1.09 (s, 9H), 1.08 (s, 9H).  $^{13}\text{C NMR}$  (100 MHz,  $\text{CDCl}_3$ )  $\delta$  215.4, 185.4, 149.09, 149.08, 141.2, 138.4, 138.3, 136.5, 133.8, 133.5, 129.9, 129.6, 128.5, 128.1, 127.7, 118.9, 69.9, 55.7, 47.0, 41.5, 35.4, 35.3, 29.3, 29.1. **IR**  $\nu_{\text{max}}/\text{cm}^{-1}$  2955, 2918, 2865, 1742, 1635, 1492, 1367, 1250, 1091, 1013, 928. **HRMS** (ESI):  $m/z$   $[\text{M}+\text{H}]^+$  calculated for  $[\text{C}_{32}\text{H}_{36}\text{ClO}_2]^+$ : 487.2398, found: 487.2389.

The *ee* was determined by HPLC analysis: CHIRALPAK IG (4.6 mm i.d.  $\times$  250 mm); hexane/2-propanol = 97/3; flow rate 0.3 mL/min; 35 °C; 250 nm; retention time: 19.44 min (minor) and 28.64 min (major).

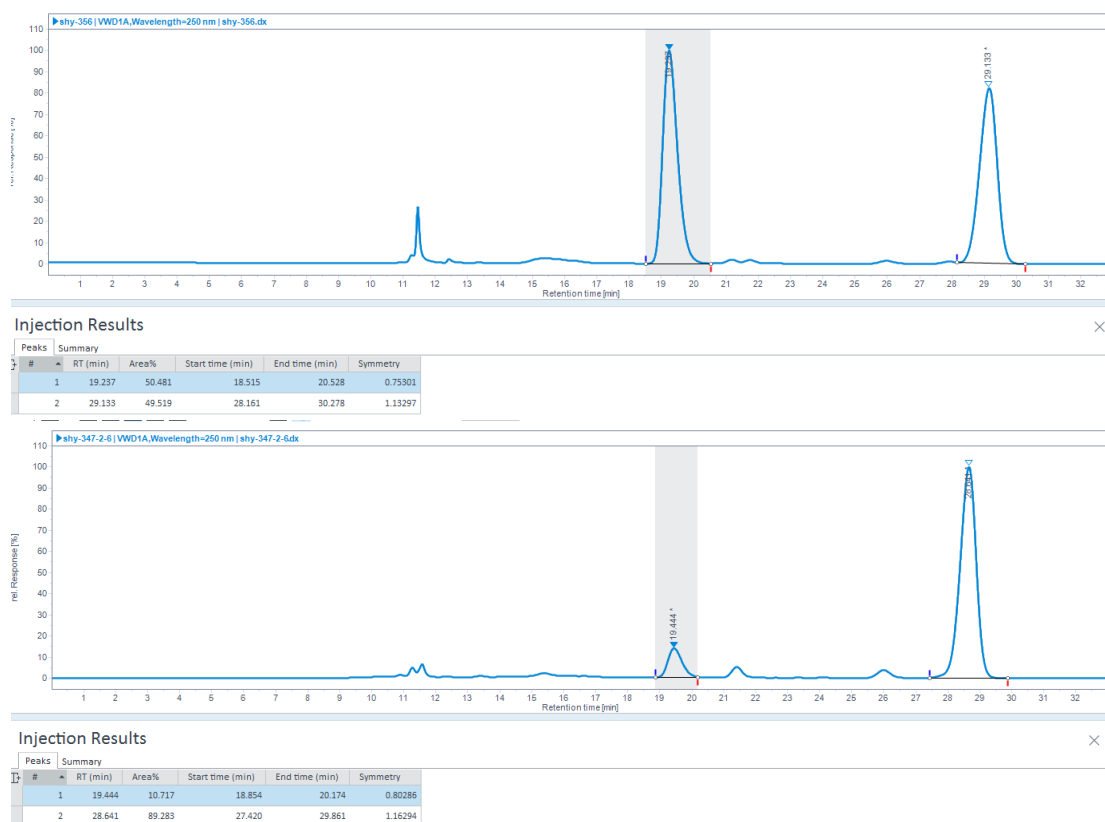

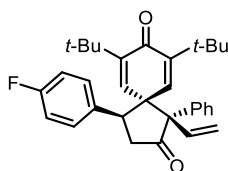

**Compound 3e:** purified by column chromatography (petroleum ether/ethyl acetate = 50:1); yellow solid, 44 mg, 91% yield, 11:1 *dr*, 89:11 *er*,  $[\alpha]_D^{20} = -108.9$  ( $c = 0.27$ ,  $\text{CHCl}_3$ );  $^1\text{H NMR}$  (400 MHz,  $\text{CDCl}_3$ )  $\delta$  7.42 - 7.35 (m, 3H), 7.17 (d,  $J = 7.6$  Hz, 2H), 6.90-6.81 (m, 4H), 6.38 (s, 1H), 6.22 (s, 1H), 5.94 (dd,  $J = 17.6, 11.2$  Hz, 1H), 5.26 (d,  $J = 11.2$  Hz, 1H), 5.13 (d,  $J = 17.6$  Hz, 1H), 3.59 (dd,  $J = 12.0, 9.2$  Hz, 1H), 3.17 (dd,  $J = 19.6, 12.0$  Hz, 1H), 3.08 (dd,  $J = 19.6, 9.2$  Hz, 1H), 1.08 (s, 18H);  $^{19}\text{F NMR}$  (376 MHz,  $\text{CDCl}_3$ )  $\delta$  -114.55 (s).  $^{13}\text{C NMR}$  (100 MHz,  $\text{CDCl}_3$ )  $\delta$  215.6, 185.5, 162.1 (d,  $J_{\text{CF}} = 245$  Hz), 149.0 (d,  $J_{\text{CF}} = 3$  Hz), 141.3, 138.5, 138.3, 136.6, 130.8 (d,  $J_{\text{CF}} = 3$  Hz), 130.1 (d,  $J_{\text{CF}} = 8$  Hz), 129.6, 128.4, 128.1, 118.8, 114.6, 114.4, 69.9, 55.8, 46.9, 41.7, 35.33, 35.27, 29.3, 29.1. **IR**  $\nu_{\text{max}}/\text{cm}^{-1}$  2955, 2921, 2855, 1737, 1635, 1509, 1357, 1231, 1160, 1105, 926. **HRMS** (ESI):  $m/z$   $[\text{M}+\text{H}]^+$  calculated for  $[\text{C}_{32}\text{H}_{36}\text{O}_2\text{F}]^+$ : 471.2694, found: 471.2692.

The *ee* was determined by HPLC analysis: CHIRALPAK IG (4.6 mm i.d.  $\times$  250 mm); hexane/2-propanol = 97/3; flow rate 0.3 mL/min; 35 °C; 250 nm; retention time: 17.25 min (minor) and 22.01 min (major).

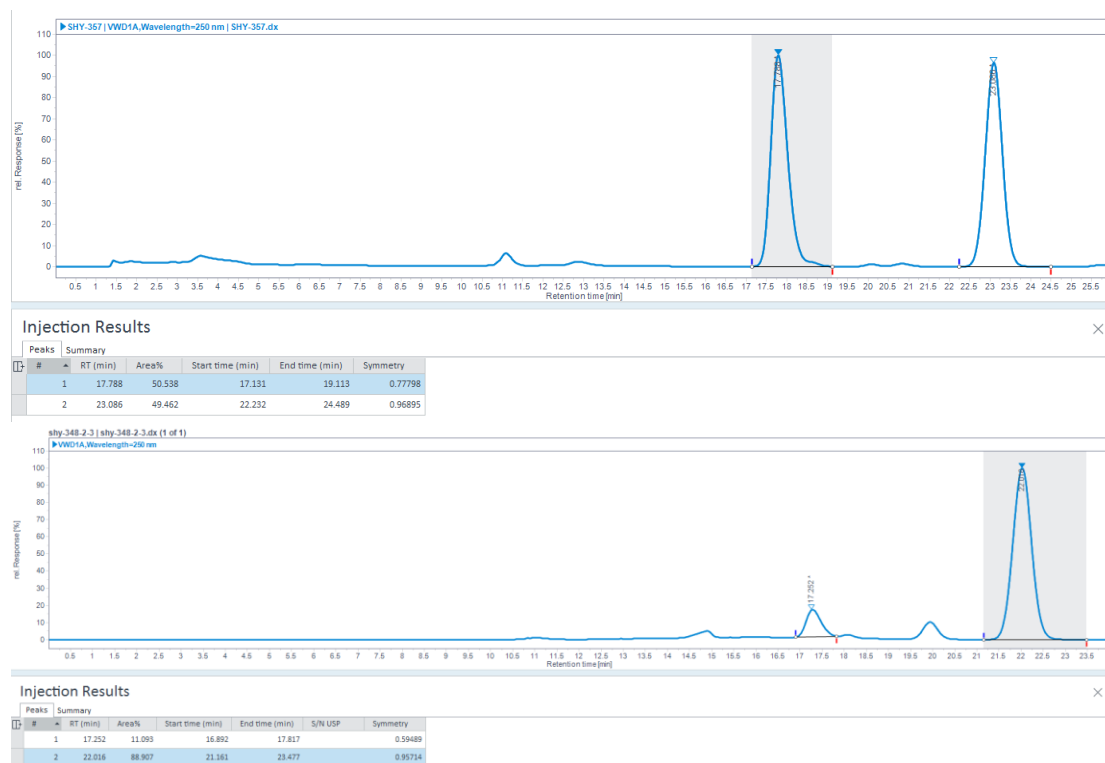

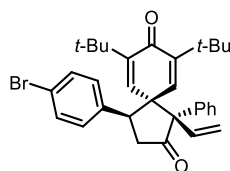

**Compound 3f:** purified by column chromatography (petroleum ether/ethyl acetate = 50:1); yellow solid, 38 mg, 68% yield, 10:1 *dr*, 90:10 *er*,  $[\alpha]_D^{20} = -129.8$  ( $c = 0.27$ ,  $\text{CHCl}_3$ );  $^1\text{H NMR}$  (400 MHz,  $\text{CDCl}_3$ )  $\delta$  7.41 - 7.33 (m, 3H), 7.27 (d,  $J = 8.4$  Hz, 2H), 7.16 (d,  $J = 7.4$  Hz, 2H), 6.78 (d,  $J = 8.4$  Hz, 2H), 6.37 (d,  $J = 2.8$  Hz, 1H), 6.21 (d,  $J = 2.8$  Hz, 1H), 5.93 (dd,  $J = 17.6, 11.2$  Hz, 1H), 5.26 (d,  $J = 11.2$  Hz, 1H), 5.13 (d,  $J = 17.6$  Hz, 1H), 3.56 (dd,  $J = 12.2, 9.0$  Hz, 1H), 3.17 (dd,  $J = 19.6, 12.2$  Hz, 1H), 3.07 (dd,  $J = 19.6, 9.0$  Hz, 1H), 1.09 (s, 9H), 1.08 (s, 9H).  $^{13}\text{C NMR}$  (100 MHz,  $\text{CDCl}_3$ )  $\delta$  215.3, 185.4, 149.1, 141.2, 138.32, 138.30, 136.4, 134.3, 130.7, 130.2, 129.6, 128.5, 128.1, 121.5, 118.9, 69.8, 55.6, 47.0, 41.5, 35.4, 35.3, 29.3, 29.1. **IR**  $\nu_{\text{max}}/\text{cm}^{-1}$  2936, 2917, 2866, 1740, 1631, 1486, 1368, 1251, 1097, 1073, 1006, 921. **HRMS** (ESI):  $m/z$   $[\text{M}+\text{Na}]^+$  calculated for  $[\text{C}_{32}\text{H}_{35}\text{BrO}_2\text{Na}]^+$ : 553.1713, found: 553.1721.

The *ee* was determined by HPLC analysis: CHIRALPAK IG (4.6 mm i.d.  $\times$  250 mm); hexane/2-propanol = 97/3; flow rate 0.3 mL/min; 35 °C; 250 nm; retention time: 19.19 min (minor) and 28.04 min (major).

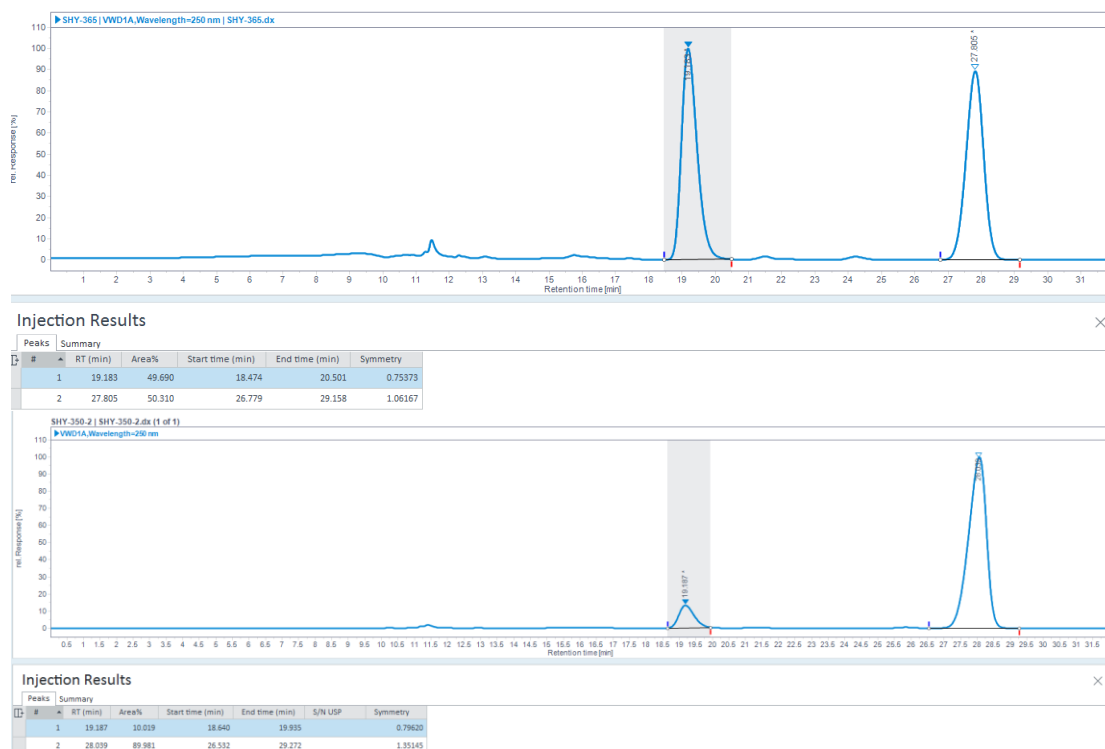

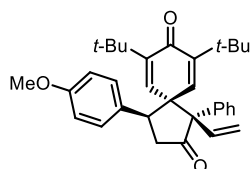

**Compound 3g:** purified by column chromatography (petroleum ether/ethyl acetate = 50:1); yellow solid, 37 mg, 72% yield, 8:1 *dr*, 86.5:13.5 *er*,  $[\alpha]_D^{20} = -115.6$  ( $c = 0.25$ ,  $\text{CHCl}_3$ );  $^1\text{H NMR}$  (400 MHz,  $\text{CDCl}_3$ )  $\delta$  7.42 - 7.34 (m, 3H), 7.17 (d,  $J = 6.8$  Hz, 2H), 6.81 (d,  $J = 8.8$  Hz, 2H), 6.67 (d,  $J = 8.8$  Hz, 2H), 6.40 (d,  $J = 3.0$  Hz, 1H), 6.22 (d,  $J = 3.0$  Hz, 1H), 5.94 (dd,  $J = 17.6, 11.2$  Hz, 1H), 5.24 (d,  $J = 11.2$  Hz, 1H), 5.12 (d,  $J = 17.76$  Hz, 1H), 3.70 (s, 3H), 3.56 (dd,  $J = 12.6, 8.8$  Hz, 1H), 3.18 (dd,  $J = 19.6, 12.6$  Hz, 1H), 3.06 (dd,  $J = 19.6, 8.8$  Hz, 1H), 1.08 (s, 18H).  $^{13}\text{C NMR}$  (100 MHz,  $\text{CDCl}_3$ )  $\delta$  216.1, 185.6, 159.0, 148.71, 148.69, 141.7, 139.0, 138.5, 136.8, 129.64, 129.63, 128.4, 128.0, 127.0, 118.7, 113.0, 69.9, 56.0, 55.4, 46.9, 41.9, 35.3, 35.2, 29.3, 29.1. **IR**  $\nu_{\text{max}}/\text{cm}^{-1}$  2954, 2914, 2867, 1738, 1626, 1513, 1366, 1249, 1182, 1105, 1033, 925. **HRMS** (ESI):  $m/z$   $[\text{M}+\text{H}]^+$  calculated for  $[\text{C}_{33}\text{H}_{39}\text{O}_3]^+$ : 483.2894, found: 483.2886.

The *ee* was determined by HPLC analysis: CHIRALPAK ADH (4.6 mm i.d.  $\times$  250 mm); hexane/2-propanol = 97/3; flow rate 0.3 mL/min; 35 °C; 250 nm; retention time: 28.05 min (minor) and 31.01 min (major).

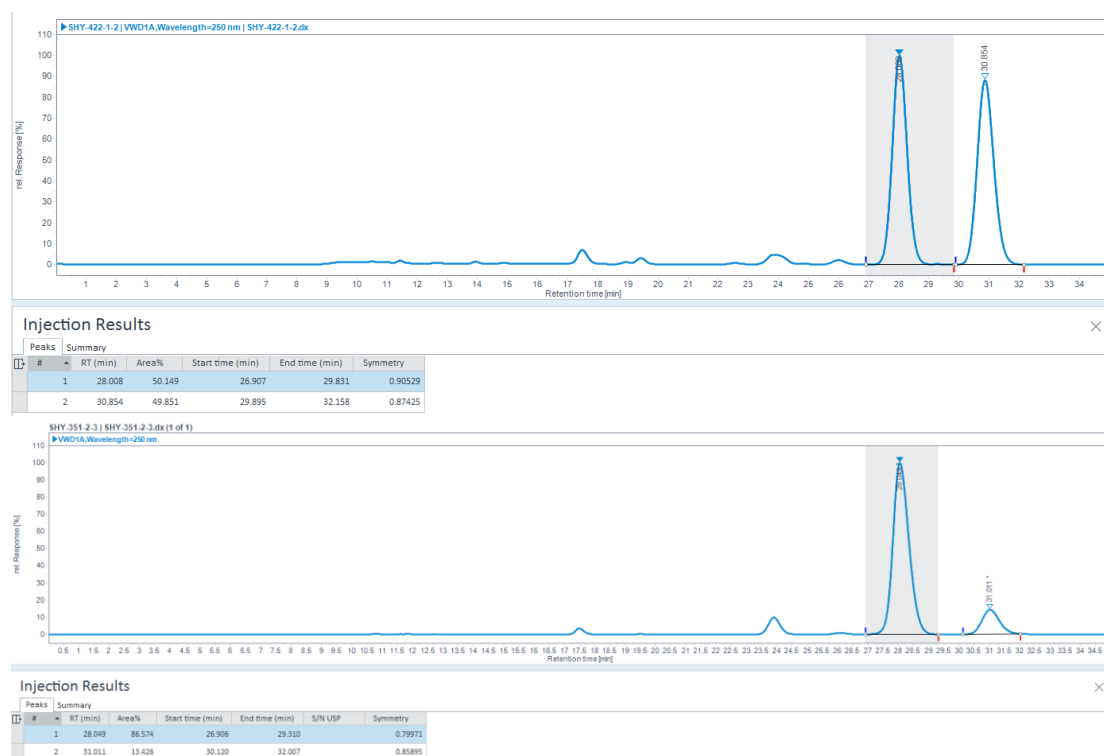

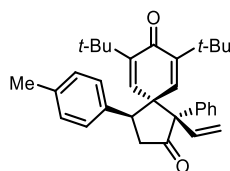

**Compound 3h:** purified by column chromatography (petroleum ether/ethyl acetate = 50:1); yellow solid, 42 mg, 76% yield, 11:1 *dr*, 90:10 *er*,  $[\alpha]_D^{20} = -106.4$  ( $c = 0.25$ ,  $\text{CHCl}_3$ );  $^1\text{H NMR}$  (400 MHz,  $\text{CDCl}_3$ )  $\delta$  7.41 - 7.32 (m, 3H), 7.17 (d,  $J = 7.4$  Hz, 2H), 6.94 (d,  $J = 8.0$  Hz, 2H), 6.78 (d,  $J = 8.0$  Hz, 2H), 6.40 (d,  $J = 3.0$  Hz, 1H), 6.22 (d,  $J = 3.0$  Hz, 1H), 5.94 (dd,  $J = 17.6, 11.2$  Hz, 1H), 5.24 (d,  $J = 11.2$  Hz, 1H), 5.13 (d,  $J = 17.6$  Hz, 1H), 3.58 (dd,  $J = 12.6, 8.6$  Hz, 1H), 3.22 (dd,  $J = 19.7, 12.6$  Hz, 1H), 3.06 (dd,  $J = 19.7, 8.6$  Hz, 1H), 2.22 (s, 3H), 1.08 (s, 9H), 1.07 (s, 9H).  $^{13}\text{C NMR}$  (100 MHz,  $\text{CDCl}_3$ )  $\delta$  216.1, 185.7, 148.63, 148.58, 141.8, 139.0, 138.6, 137.3, 136.7, 132.0, 129.6, 128.43, 128.37, 128.2, 128.0, 118.7, 69.9, 55.9, 47.2, 41.7, 35.3, 35.2, 29.3, 29.1, 21.1. **IR**  $\nu_{\text{max}}/\text{cm}^{-1}$  2953, 2921, 2865, 1740, 1636, 1455, 1367, 1245, 1176, 927. **HRMS** (ESI):  $m/z$   $[\text{M}+\text{H}]^+$  calculated for  $[\text{C}_{33}\text{H}_{39}\text{O}_2]^+$ : 467.2944, found: 467.2936.

The *ee* was determined by HPLC analysis: CHIRALPAK ADH (4.6 mm i.d.  $\times$  250 mm); hexane/2-propanol = 97/3; flow rate 0.3 mL/min; 35 °C; 250 nm; retention time: 21.20 min (minor) and 24.03 min (major).

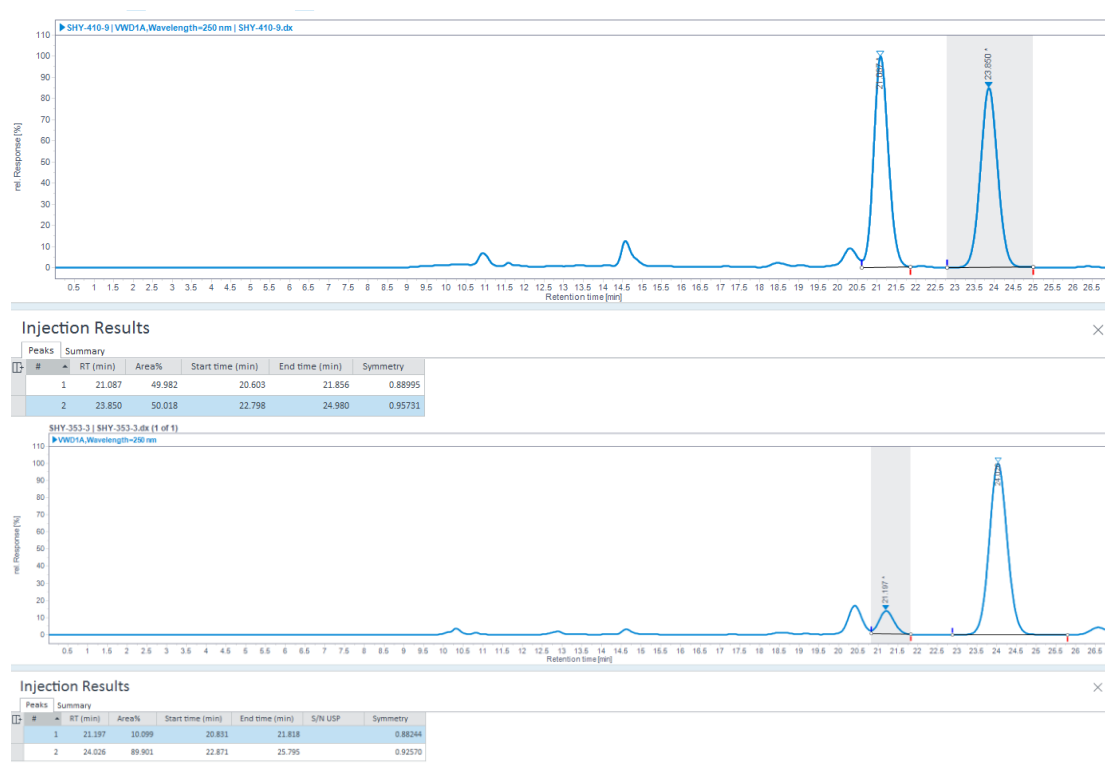

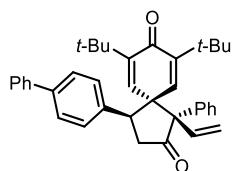

**Compound 3i:** purified by column chromatography (petroleum ether/ethyl acetate = 50:1); yellow solid, 40 mg, 70% yield, > 20:1 *dr*, 90:10 *er*,  $[\alpha]_D^{20} = -149.2$  ( $c = 0.20$ ,  $\text{CHCl}_3$ );  $^1\text{H NMR}$  (400 MHz,  $\text{CDCl}_3$ )  $\delta$  7.47 - 7.29 (m, 10H), 7.20 (d,  $J = 7.2$  Hz, 2H), 6.97 (d,  $J = 8.2$  Hz, 2H), 6.43 (d,  $J = 3.0$  Hz, 1H), 6.26 (d,  $J = 3.0$  Hz, 1H), 5.96 (dd,  $J = 17.6, 11.2$  Hz, 1H), 5.26 (d,  $J = 11.2$  Hz, 1H), 5.14 (d,  $J = 17.6$  Hz, 1H), 3.66 (dd,  $J = 12.6, 8.6$  Hz, 1H), 3.28 (dd,  $J = 19.6, 12.6$  Hz, 1H), 3.12 (dd,  $J = 19.6, 8.6$  Hz, 1H), 1.10 (s, 9H), 1.07 (s, 9H).  $^{13}\text{C NMR}$  (100 MHz,  $\text{CDCl}_3$ )  $\delta$  215.9, 185.5, 148.8, 148.7, 141.5, 140.68, 140.66, 138.8, 138.5, 136.7, 134.2, 129.6, 129.0, 128.9, 128.4, 128.1, 127.5, 127.2, 126.2, 118.8, 69.9, 55.9, 47.3, 41.5, 35.34, 35.26, 29.3, 29.1. **IR**  $\nu_{\text{max}}/\text{cm}^{-1}$  2952, 2906, 2861, 1743, 1633, 1355, 1250, 1175, 837. **HRMS** (ESI):  $m/z$   $[\text{M}+\text{H}]^+$  calculated for  $[\text{C}_{38}\text{H}_{41}\text{O}_2]^+$ : 529.3101, found: 529.3096.

The *ee* was determined by HPLC analysis: CHIRALPAK IG (4.6 mm i.d.  $\times$  250 mm); hexane/2-propanol = 97/3; flow rate 0.3 mL/min; 35 °C; 250 nm; retention time: 25.48 min (minor) and 20.88 min (major).

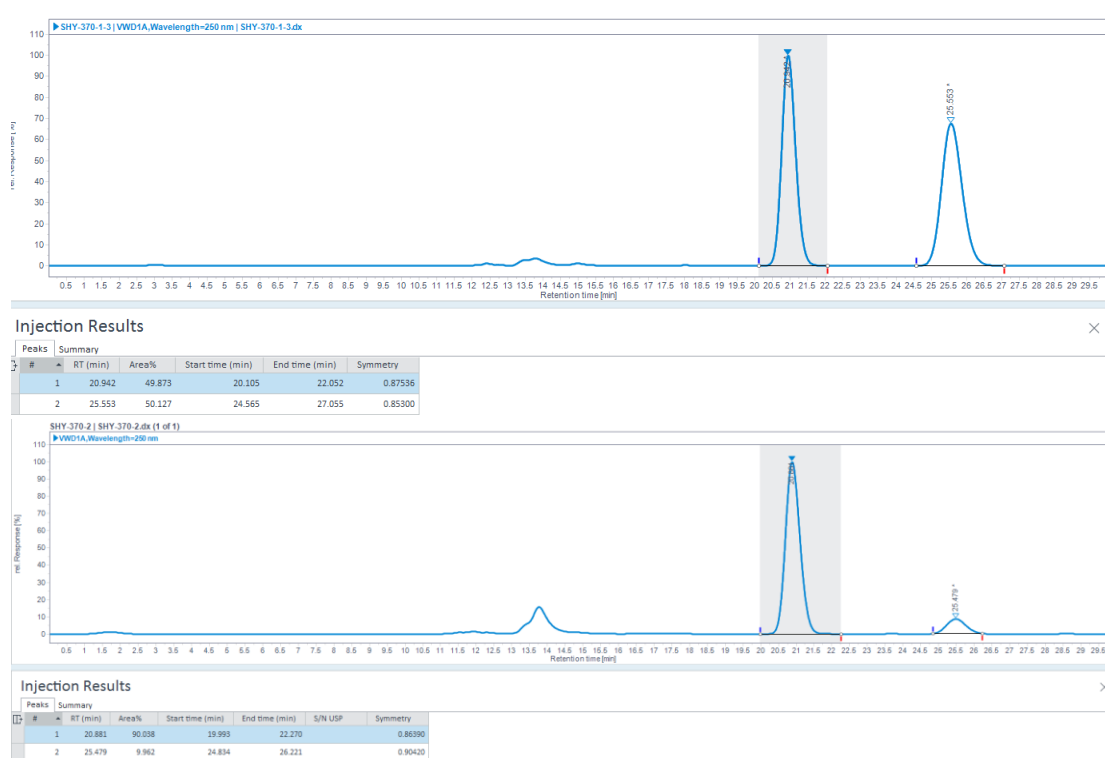



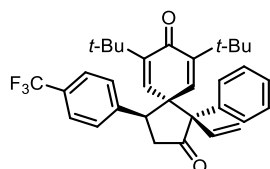

**Compound 3j** : purified by column chromatography (petroleum ether/ethyl acetate = 50:1); yellow solid, 42 mg, 76% yield, > 20:1 *dr*, 96.5:3.5 *er*,  $[\alpha]_D^{20} = -115.2$  ( $c = 0.24$ ,  $\text{CHCl}_3$ );  $^1\text{H NMR}$  (400 MHz,  $\text{CDCl}_3$ )  $\delta$  7.41 - 7.35 (m, 5H), 7.18 (d,  $J = 7.4$  Hz, 2H), 7.04 (d,  $J = 8.0$  Hz, 2H), 6.38 (s, 1H), 6.24 (s, 1H), 5.93 (dd,  $J = 17.6, 11.2$  Hz, 1H), 5.27 (d,  $J = 11.2$  Hz, 1H), 5.14 (d,  $J = 17.6$  Hz, 1H), 3.66 (dd,  $J = 12.0, 8.8$  Hz, 1H), 3.24 (dd,  $J = 19.6, 12.0$  Hz, 1H), 3.12 (dd,  $J = 19.6, 8.8$  Hz, 1H), 1.09 (s, 9H), 1.05 (s, 9H).  $^{19}\text{F NMR}$  (376 MHz,  $\text{CDCl}_3$ )  $\delta$  -62.69(s).  $^{13}\text{C NMR}$  (100 MHz,  $\text{CDCl}_3$ )  $\delta$  215.1, 185.3, 149.24, 149.81, 141.0, 139.5, 138.2, 138.1, 136.3, 130.0 (q,  $J_{\text{CF}} = 33$  Hz), 129.6, 128.9, 128.5, 128.2, 124.5 (q,  $J_{\text{CF}} = 3$  Hz), 124.0 (q,  $J_{\text{CF}} = 270$  Hz), 119.0, 69.8, 55.7, 47.3, 41.2, 35.4, 35.3, 29.3, 29.0. **IR**  $\nu_{\text{max}}/\text{cm}^{-1}$  2956, 2915, 2867, 1743, 1637, 1368, 1325, 1249, 1165, 1124, 1070. **HRMS** (ESI):  $m/z$   $[\text{M}+\text{Na}]^+$  calculated for  $[\text{C}_{33}\text{H}_{35}\text{F}_3\text{O}_2\text{Na}]^+$ : 543.2481, found: 543.2482.

The *ee* was determined by HPLC analysis: CHIRALPAK OJH (4.6 mm i.d.  $\times$  250 mm); hexane/2-propanol = 97/3; flow rate 0.8 mL/min; 35 °C; 250 nm; retention time: 12.74 min (minor) and 7.25 min (major).

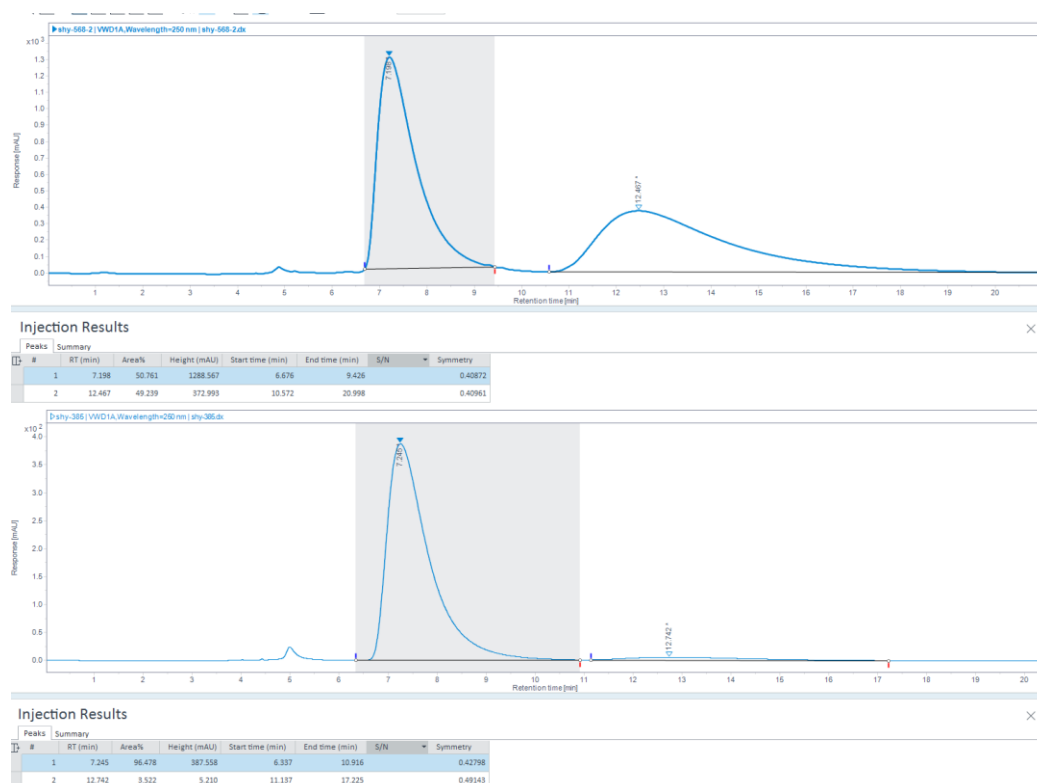

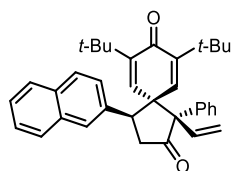

**Compound 3k:** purified by column chromatography (petroleum ether/ethyl acetate = 50:1); yellow solid, 45 mg, 80% yield, 15:1 *dr*, 90:10 *er*,  $[\alpha]_D^{20} = -132.6$  ( $c = 0.27$ ,  $\text{CHCl}_3$ );  $^1\text{H NMR}$  (400 MHz,  $\text{CDCl}_3$ )  $\delta$  7.73 - 7.70 (m, 1H), 7.65 - 7.61 (m, 2H), 7.44 - 7.35 (m, 6H), 7.22 (d,  $J = 7.0$  Hz, 2H), 7.01 (d,  $J = 8.6$  Hz, 1H), 6.50 (d,  $J = 3.0$  Hz, 1H), 6.32 (d,  $J = 3.0$  Hz, 1H), 5.96 (dd,  $J = 17.6, 11.2$  Hz, 1H), 5.26 (d,  $J = 11.2$  Hz, 1H), 5.15 (d,  $J = 17.6$ , 1H), 3.79 (dd,  $J = 12.6, 8.6$  Hz, 1H), 3.39 (dd,  $J = 19.6, 12.6$  Hz, 1H), 3.17 (dd,  $J = 19.6, 8.6$  Hz, 1H), 1.06 (s, 9H), 0.99 (s, 9H).  $^{13}\text{C NMR}$  (100 MHz,  $\text{CDCl}_3$ )  $\delta$  215.7, 185.4, 148.6, 141.5, 138.7, 138.4, 136.5, 132.64, 132.59, 132.4, 129.5, 128.3, 127.9, 127.5, 127.4, 127.3, 126.9, 126.5, 126.2, 125.9, 118.7, 69.8, 55.9, 47.5, 41.6, 35.1, 35.0, 29.2, 28.9. **IR**  $\nu_{\text{max}}/\text{cm}^{-1}$  2950, 2909, 2864, 1740, 1630, 1483, 1367, 1250, 1000, 923. **HRMS** (ESI):  $m/z$   $[\text{M}+\text{Na}]^+$  calculated for  $[\text{C}_{36}\text{H}_{38}\text{O}_2\text{Na}]^+$ : 525.2764, found: 525.2764.

The *ee* was determined by HPLC analysis: CHIRALPAK ADH (4.6 mm i.d.  $\times$  250 mm); hexane/2-propanol = 90/10; flow rate 0.5 mL/min; 35 °C; 250 nm; retention time: 10.17 min (minor) and 12.27 min (major).

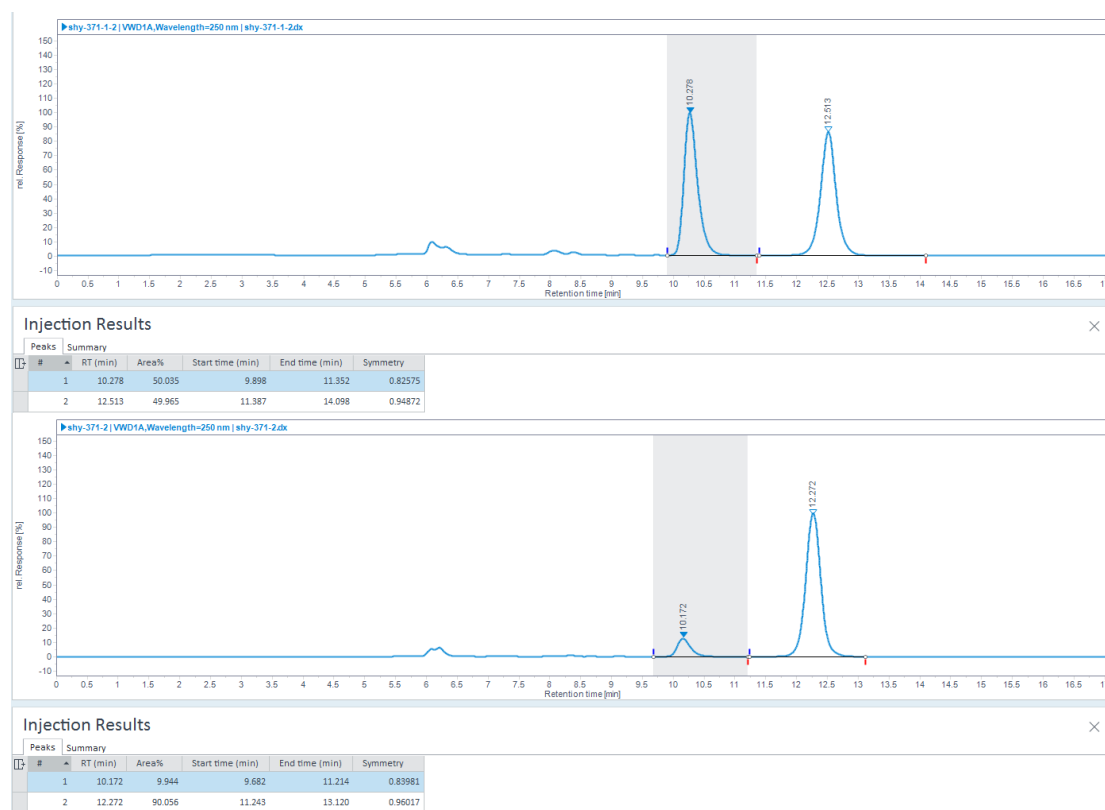

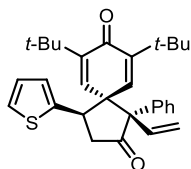

**Compound 3l:** purified by column chromatography (petroleum ether/ethyl acetate = 50:1); yellow solid, 32 mg, 65% yield, > 20:1 *dr*, 81:19 *er*,  $[\alpha]_D^{20} = -75.4$  ( $c = 0.18$ ,  $\text{CHCl}_3$ );  $^1\text{H NMR}$  (400 MHz,  $\text{CDCl}_3$ )  $\delta$  7.41 - 7.34 (m, 3H), 7.15 (d,  $J = 7.6$  Hz, 2H), 7.05 (d,  $J = 5.2$  Hz, 1H), 6.83 - 6.79 (m, 1H), 6.60 (d,  $J = 3.4$  Hz, 1H), 6.33 (d,  $J = 3.0$  Hz, 1H), 6.20 (d,  $J = 3.0$  Hz, 1H), 5.90 (dd,  $J = 17.6, 11.2$  Hz, 1H), 5.26 (d,  $J = 11.2$  Hz, 1H), 5.14 (d,  $J = 17.6$  Hz, 1H), 3.85 (dd,  $J = 12.4, 8.6$  Hz, 1H), 3.26 (dd,  $J = 19.6, 8.6$  Hz, 1H), 3.16 (dd,  $J = 19.6, 12.4$  Hz, 1H), 1.16 (s, 9H), 1.07 (s, 9H).  $^{13}\text{C NMR}$  (100 MHz,  $\text{CDCl}_3$ )  $\delta$  214.9, 185.9, 149.6, 149.3, 141.3, 139.6, 138.49, 138.46, 136.3, 129.6, 128.5, 128.1, 126.3, 125.6, 123.8, 119.0, 69.8, 55.7, 43.6, 42.7, 35.5, 35.2, 29.3, 29.0. **IR**  $\nu_{\text{max}}/\text{cm}^{-1}$  2952, 2917, 2865, 1741, 1634, 1367, 1251, 1109, 1000, 932. **HRMS** (ESI):  $m/z$   $[\text{M}+\text{Na}]^+$  calculated for  $[\text{C}_{30}\text{H}_{34}\text{O}_2\text{SNa}]^+$ : 481.2172, found: 481.2177.

The *ee* was determined by HPLC analysis: CHIRALPAK ADH (4.6 mm i.d.  $\times$  250 mm); hexane/2-propanol = 97/3; flow rate 0.3 mL/min; 35 °C; 250 nm; retention time: 17.26 min (minor) and 14.49 min (major).

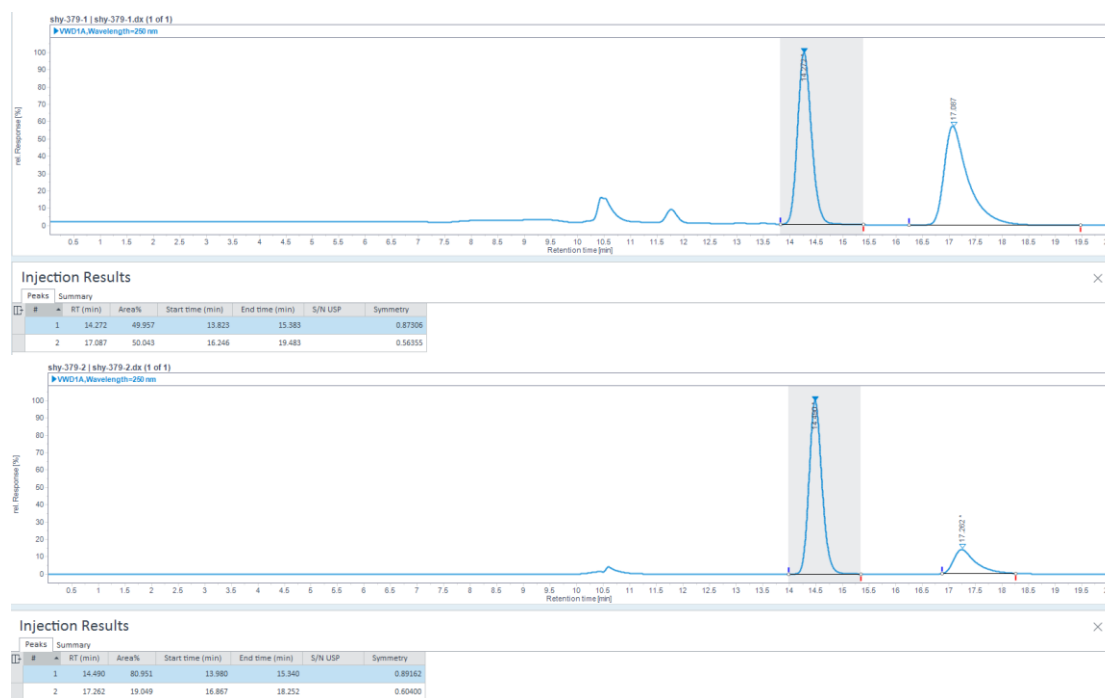

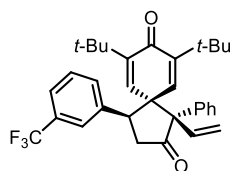

**Compound 3m:** purified by column chromatography (petroleum ether/ethyl acetate = 50:1); yellow solid, 40 mg, 72% yield, >20:1 *dr*, 95:5 *er*,  $[\alpha]_D^{20} = -95.5$  ( $c = 0.19$ ,  $\text{CHCl}_3$ );  $^1\text{H NMR}$  (400 MHz,  $\text{CDCl}_3$ )  $\delta$  7.44 - 7.42 (m, 4H), 7.31 - 7.27 (m, 1H), 7.19 - 7.17 (m, 3H), 7.12 (d,  $J = 7.6$  Hz, 1H), 6.40 (d,  $J = 2.8$  Hz, 1H), 6.24 (d,  $J = 2.8$  Hz, 1H), 5.92 (dd,  $J = 17.6, 11.2$  Hz, 1H), 5.27 (d,  $J = 11.2$  Hz, 1H), 5.14 (d,  $J = 17.6$  Hz, 1H), 3.66 (dd,  $J = 12.4, 8.8$  Hz, 1H), 3.26 (dd,  $J = 19.6, 12.4$  Hz, 1H), 3.12 (dd,  $J = 19.6, 8.8$  Hz, 1H), 1.08 (s, 9H), 1.06 (s, 9H).  $^{19}\text{F NMR}$  (376 MHz,  $\text{CDCl}_3$ )  $\delta$  -62.5 (s).  $^{13}\text{C NMR}$  (100 MHz,  $\text{CDCl}_3$ )  $\delta$  215.1, 185.4, 149.4, 149.3, 141.0, 138.2, 137.9, 136.4, 136.3, 131.8, 130.1 (q,  $J_{\text{CF}} = 32$  Hz), 129.5, 128.5, 128.2, 128.1, 125.1 (q,  $J_{\text{CF}} = 4$  Hz), 124.6 (q,  $J_{\text{CF}} = 4$  Hz), 124.0 (q,  $J_{\text{CF}} = 271$  Hz), 119.0, 69.8, 55.7, 47.3, 41.2, 35.34, 35.26, 29.2, 29.0. **IR**  $\nu_{\text{max}}/\text{cm}^{-1}$  2958, 2913, 2868, 1744, 1657, 1638, 1368, 1327, 1165, 1127, 1076. **HRMS** (ESI):  $m/z$   $[\text{M}+\text{H}]^+$  calculated for  $[\text{C}_{33}\text{H}_{36}\text{O}_2\text{F}_3]^+$ : 521.2667, found: 521.2668.

The *ee* was determined by HPLC analysis: CHIRALPAK ODH (4.6 mm i.d.  $\times$  250 mm); hexane/2-propanol = 95/5; flow rate 0.5 mL/min; 35 °C; 250 nm; retention time: 12.84 min (minor) and 10.08 min (major).

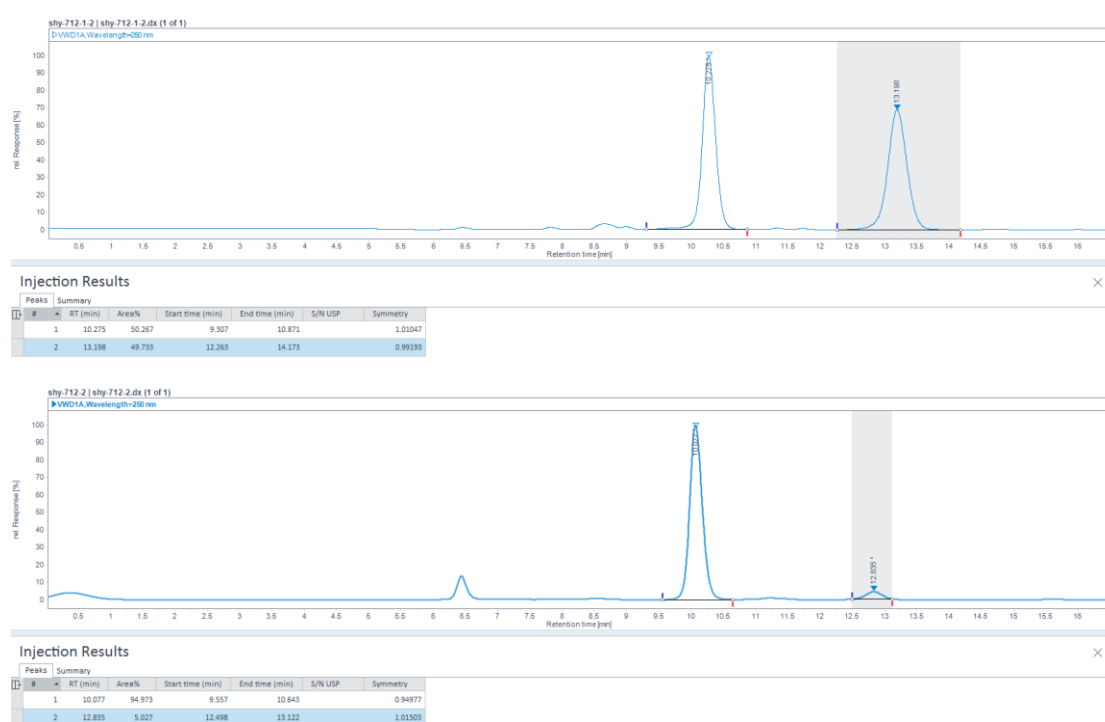

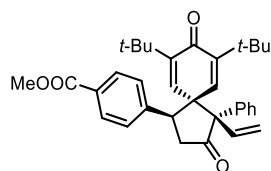

**Compound 3n:** purified by column chromatography (petroleum ether/ethyl acetate = 50:1); yellow solid, 35 mg, 70% yield, >20:1 *dr*, 94.5:5.5 *er*,  $[\alpha]_D^{20} = -81.69$  ( $c = 0.31$ ,  $\text{CHCl}_3$ );  $^1\text{H NMR}$  (400 MHz,  $\text{CDCl}_3$ )  $\delta$  7.82 (d,  $J = 8.0$  Hz, 2H), 7.43 - 7.37 (m, 3H), 7.18 (d,  $J = 7.6$  Hz, 2H), 6.99 (d,  $J = 8.0$  Hz, 2H), 6.40 (d,  $J = 2.8$  Hz, 1H), 6.24 (d,  $J = 2.8$  Hz, 1H), 5.93 (dd,  $J = 17.6, 11.2$  Hz, 1H), 5.27 (d,  $J = 11.2$  Hz, 1H), 5.14 (d,  $J = 17.6$  Hz, 1H), 3.86 (s, 3H), 3.66 (dd,  $J = 12.4, 8.8$  Hz, 1H), 3.26 (dd,  $J = 19.6, 12.4$  Hz, 1H), 3.12 (dd,  $J = 19.6, 8.8$  Hz, 1H), 1.08 (s, 9H), 1.06 (s, 9H).  $^{13}\text{C NMR}$  (100 MHz,  $\text{CDCl}_3$ )  $\delta$  215.3, 185.4, 166.7, 149.09, 149.05, 141.1, 140.6, 138.2, 136.4, 129.6, 129.4, 128.8, 128.6, 128.5, 128.2, 119.0, 69.8, 55.7, 52.3, 47.5, 41.4, 35.4, 35.3, 29.3, 29.1. **IR**  $\nu_{\text{max}}/\text{cm}^{-1}$  2953, 2910, 2866, 1744, 1720, 1657, 1635, 1368, 1279, 1250, 1186, 1112. **HRMS** (ESI):  $m/z$   $[\text{M}+\text{H}]^+$  calculated for  $[\text{C}_{34}\text{H}_{38}\text{O}_4\text{Na}]^+$ : 533.2668, found: 533.2669.

The *ee* was determined by HPLC analysis: CHIRALPAK ADH (4.6 mm i.d.  $\times$  250 mm); hexane/2-propanol = 80/20; flow rate 0.4 mL/min; 35  $^\circ\text{C}$ ; 250 nm; retention time: 20.77 min (minor) and 16.63 min (major).

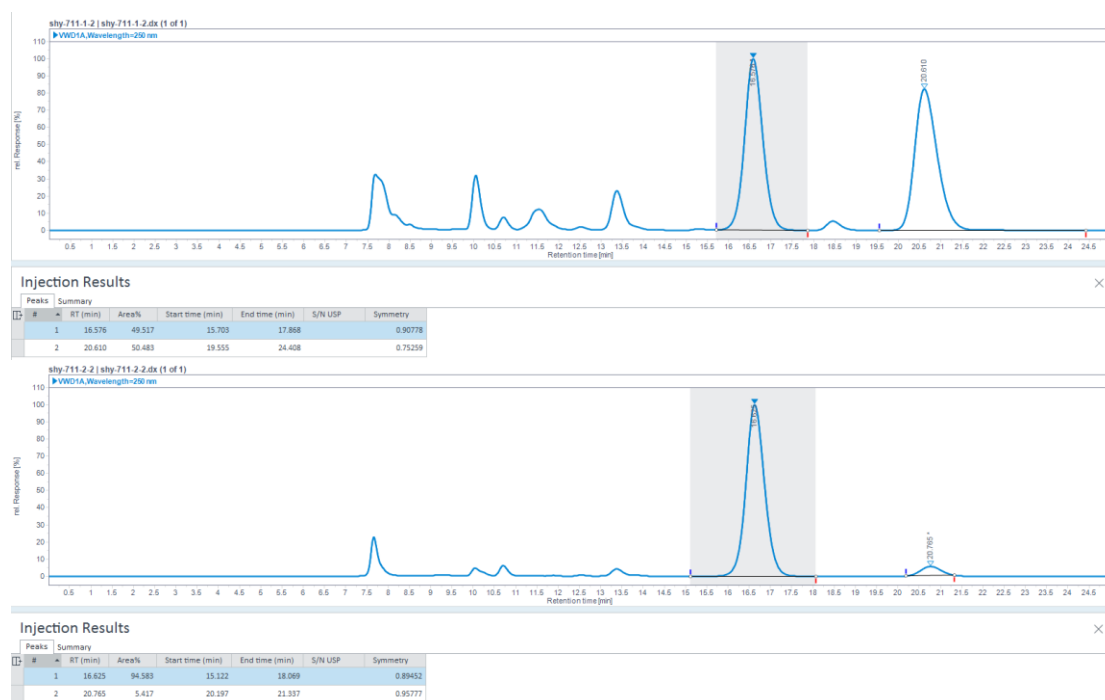

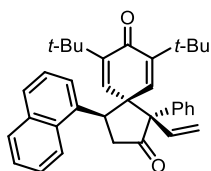

**Compound 30:** purified by column chromatography (petroleum ether/ethyl acetate = 50:1); yellow solid, 35 mg, 66% yield,  $dr > 20:1$ , 88:12 *er*,  $[\alpha]_D^{20} = +60.9$  ( $c = 0.19$ ,  $\text{CHCl}_3$ );  $^1\text{H NMR}$  (400 MHz,  $\text{CDCl}_3$ )  $\delta$  7.74 (d,  $J = 8.0$  Hz, 1H), 7.66 (d,  $J = 8.0$  Hz, 1H), 7.48 - 7.42 (m, 4H), 7.37 - 7.21 (m, 6H), 6.53 (d,  $J = 3.0$  Hz, 1H), 6.31 (d,  $J = 3.0$  Hz, 1H), 6.04 (dd,  $J = 17.6, 11.2$  Hz, 1H), 5.28 (d,  $J = 11.2$  Hz, 1H), 5.16 (d,  $J = 17.6$  Hz, 1H), 4.75 (dd,  $J = 12.2, 8.6$  Hz, 1H), 3.36 (dd,  $J = 19.6, 12.2$  Hz, 1H), 3.20 (dd,  $J = 19.6, 8.6$  Hz, 1H), 1.11 (s, 9H), 0.65 (s, 9H).  $^{13}\text{C NMR}$  (100 MHz,  $\text{CDCl}_3$ )  $\delta$  216.1, 184.9, 148.7, 147.5, 141.1, 139.4, 138.6, 136.9, 133.7, 132.5, 131.3, 129.6, 129.3, 128.5, 128.4, 128.2, 126.3, 126.2, 125.4, 124.2, 122.9, 118.8, 70.2, 56.1, 43.1, 41.3, 35.3, 34.8, 29.1, 28.5. **IR**  $\nu_{\text{max}}/\text{cm}^{-1}$  2955, 2913, 2866, 1740, 1632, 1447, 1366, 1254, 1095, 936. **HRMS** (ESI):  $m/z$   $[\text{M}+\text{Na}]^+$  calculated for  $[\text{C}_{36}\text{H}_{38}\text{O}_2\text{Na}]^+$ : 525.2764, found: 525.2764.

The *ee* was determined by HPLC analysis: CHIRALPAK ASH (4.6 mm i.d.  $\times$  250 mm); hexane/2-propanol = 97/3; flow rate 0.3 mL/min; 35 °C; 250 nm; retention time: 21.29 min (minor) and 17.10 min (major).

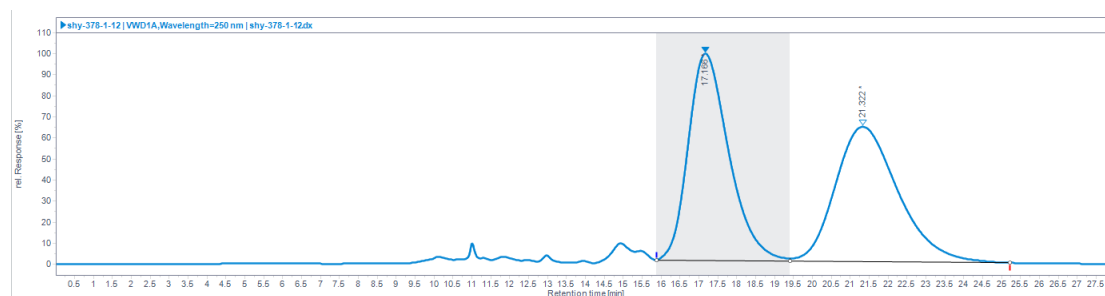

| Injection Results |          |         |                  |                |          |
|-------------------|----------|---------|------------------|----------------|----------|
| Peaks             |          | Summary |                  |                |          |
| #                 | RT (min) | Area%   | Start time (min) | End time (min) | Symmetry |
| 1                 | 17.166   | 49.842  | 15.869           | 19.400         | 0.70267  |
| 2                 | 21.322   | 50.158  | 19.400           | 25.209         | 0.74066  |

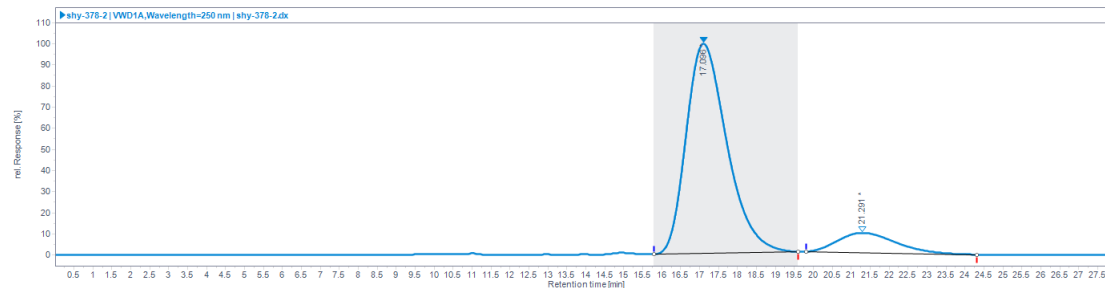

| Injection Results |          |         |                  |                |          |
|-------------------|----------|---------|------------------|----------------|----------|
| Peaks             |          | Summary |                  |                |          |
| #                 | RT (min) | Area%   | Start time (min) | End time (min) | Symmetry |
| 1                 | 17.096   | 88.155  | 15.802           | 19.593         | 0.70171  |
| 2                 | 21.291   | 11.845  | 19.813           | 24.309         | 0.71003  |

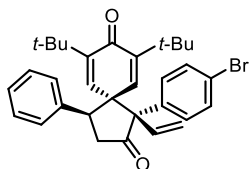

**Compound 3p:** purified by column chromatography (petroleum ether/ethyl acetate = 50:1); white solid, 38 mg, 71% yield, 11:1 *dr*, 93:7 *er*,  $[\alpha]_D^{20} = -134.4$  ( $c = 0.26$ ,  $\text{CHCl}_3$ );  $^1\text{H NMR}$  (400 MHz,  $\text{CDCl}_3$ )  $\delta$  7.53 (d,  $J = 8.0$  Hz, 2H), 7.15 (d,  $J = 4.4$  Hz, 3H), 7.05 (d,  $J = 8.0$  Hz, 2H), 6.90 (d,  $J = 4.4$  Hz, 2H), 6.38 (s, 1H), 6.21 (s, 1H), 5.90 (dd,  $J = 17.6, 11.2$  Hz, 1H), 5.26 (d,  $J = 11.2$  Hz, 1H), 5.11 (d,  $J = 17.6$  Hz, 1H), 3.55 (dd,  $J = 12.6, 8.6$  Hz, 1H), 3.25 (dd,  $J = 19.8, 12.6$  Hz, 1H), 3.06 (dd,  $J = 19.8, 8.6$  Hz, 1H), 1.09 (s, 9H), 1.06 (s, 9H).  $^{13}\text{C NMR}$  (100 MHz,  $\text{CDCl}_3$ )  $\delta$  215.4, 185.4, 149.2, 148.9, 140.9, 138.4, 137.6, 136.4, 134.8, 131.5, 131.4, 128.6, 127.8, 127.6, 122.2, 119.3, 69.4, 55.7, 47.7, 41.3, 35.4, 35.2, 29.3, 29.0. **IR**  $\nu_{\text{max}}/\text{cm}^{-1}$  2954, 2922, 2865, 1742, 1658, 1637, 1487, 1368, 1249, 1177, 1008. **HRMS** (ESI):  $m/z$   $[\text{M}+\text{Na}]^+$  calculated for  $[\text{C}_{32}\text{H}_{35}\text{BrO}_2\text{Na}]^+$ : 553.1713, found: 553.1721.

The *ee* was determined by HPLC analysis: CHIRALPAK IG (4.6 mm i.d.  $\times$  250 mm); hexane/2-propanol = 97/3; flow rate 0.3 mL/min; 35 °C; 250 nm; retention time: 17.38 min (minor) and 19.81 min (major).

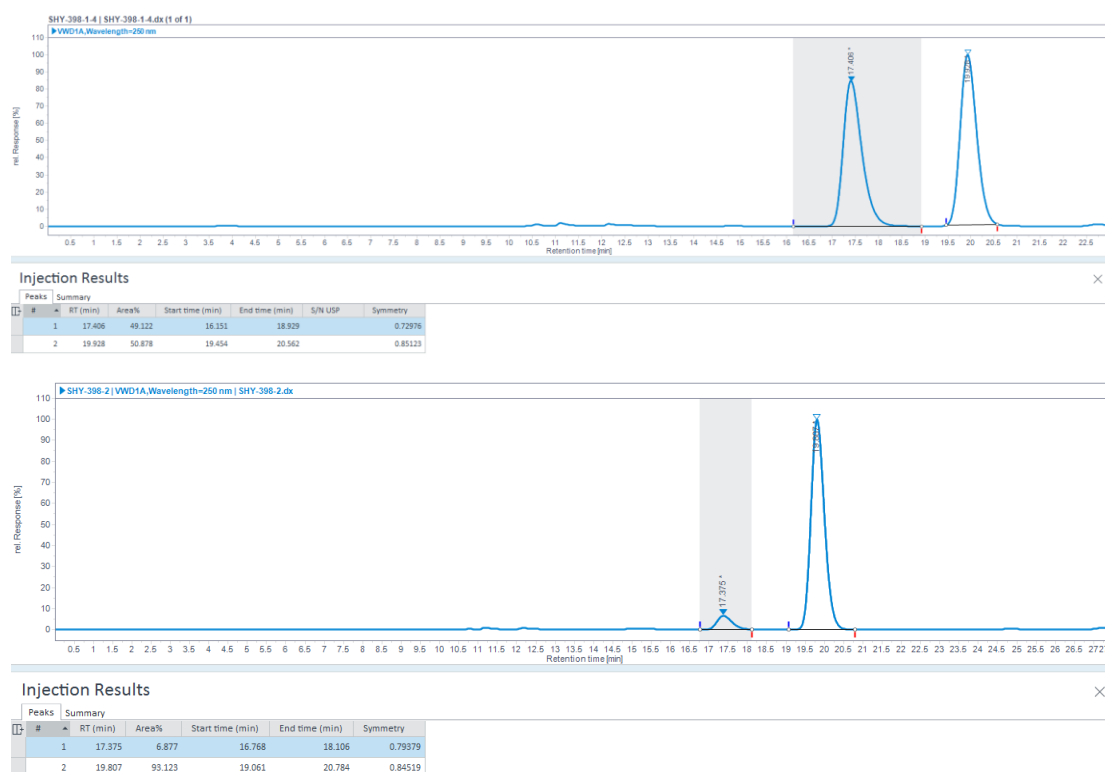

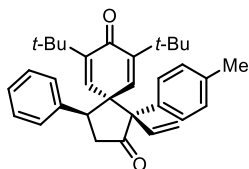

**Compound 3q:** purified by column chromatography (petroleum ether/ethyl acetate = 50:1); yellow solid, 50 mg, 96% yield, > 20:1 *dr*, 91.5:8.5 *er*,  $[\alpha]_D^{20} = -140.2$  ( $c = 0.29$ ,  $\text{CHCl}_3$ );  $^1\text{H NMR}$  (400 MHz,  $\text{CDCl}_3$ )  $\delta$  7.20 (d,  $J = 8.0$  Hz, 2H), 7.14 - 7.12 (m, 3H), 7.06 (d,  $J = 8.0$  Hz, 2H), 6.91- 6.88 (m, 2H), 6.40 (d,  $J = 3.0$  Hz, 1H), 6.29 (d,  $J = 3.0$  Hz, 1H), 5.92 (dd,  $J = 17.6, 11.2$  Hz, 1H), 5.22 (d,  $J = 11.2$  Hz, 1H), 5.10 (d,  $J = 17.6$  Hz, 1H), 3.60 (dd,  $J = 12.6, 8.8$  Hz, 1H), 3.22 (dd,  $J = 19.8, 12.6$  Hz, 1H), 3.07 (dd,  $J = 19.8, 8.8$  Hz, 1H), 2.39 (s, 3H), 1.09 (s, 9H), 1.06 (s, 9H).  $^{13}\text{C NMR}$  (100 MHz,  $\text{CDCl}_3$ )  $\delta$  216.1, 185.6, 148.7, 148.6, 141.7, 138.9, 137.9, 136.8, 135.2, 135.1, 129.5, 129.1, 128.6, 127.7, 127.5, 118.5, 69.7, 55.9, 47.6, 41.4, 35.3, 35.2, 29.3, 29.0, 21.2. **IR**  $\nu_{\text{max}}/\text{cm}^{-1}$  2954, 2920, 2865, 1742, 1635, 1454, 1367, 1251, 927. **HRMS** (ESI):  $m/z$   $[\text{M}+\text{H}]^+$  calculated for  $[\text{C}_{33}\text{H}_{39}\text{O}_2]^+$ : 467.2945, found:467.2936.

The *ee* was determined by HPLC analysis: CHIRALPAK IG (4.6 mm i.d.  $\times$  250 mm); hexane/2-propanol = 97/3; flow rate 0.3 mL/min; 35 °C; 250 nm; retention time: 17.91 min (minor) and 19.74 min (major).

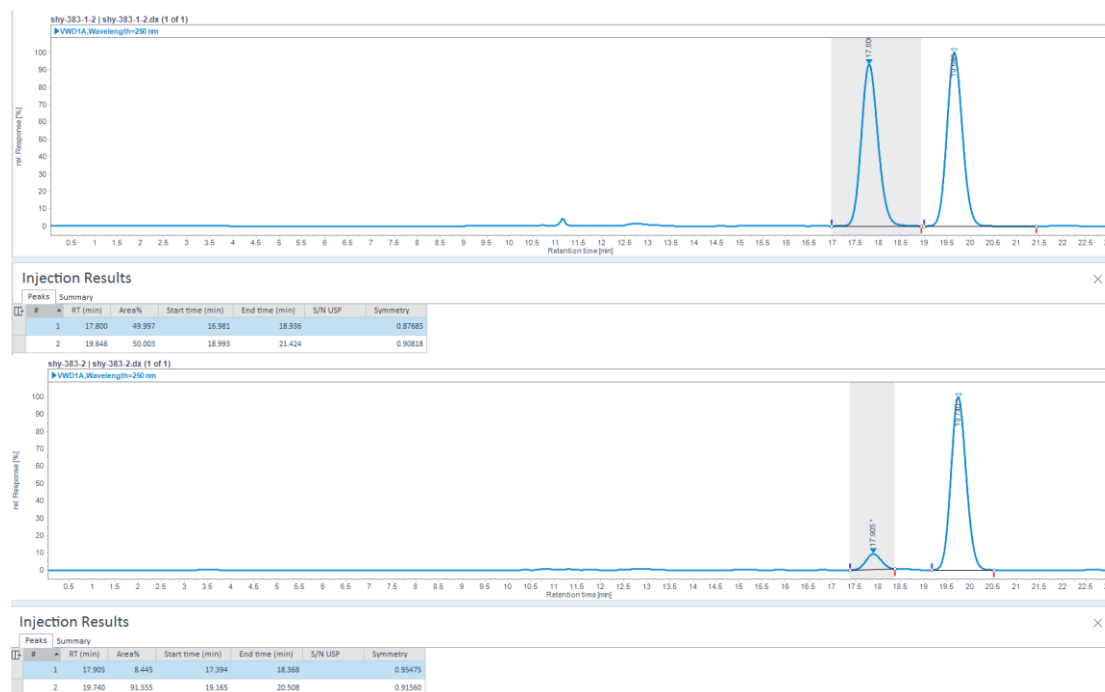



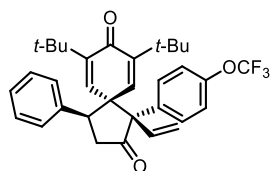

**Compound 3r:** purified by column chromatography (petroleum ether/ethyl acetate = 50:1); yellow solid, 34 mg, 69% yield, >20:1 *dr*, 93:7 *er*,  $[\alpha]_D^{20} = -114.6$  ( $c = 0.23$ ,  $\text{CHCl}_3$ );  $^1\text{H NMR}$  (400 MHz,  $\text{CDCl}_3$ )  $\delta$  7.26 - 7.15 (m, 7H), 6.92 - 7.91 (m, 2H), 6.39 (s, 1H), 6.14 (s, 1H), 5.93 (dd,  $J = 17.6, 11.2$  Hz, 1H), 5.28 (dd,  $J = 11.2, 0.8$  Hz, 1H), 5.14 (dd,  $J = 17.6, 0.8$  Hz, 1H), 3.57 (dd,  $J = 12.4, 8.6$  Hz, 1H), 3.27 (dd,  $J = 19.8, 12.4$  Hz, 1H), 3.08 (dd,  $J = 19.8, 8.6$  Hz, 1H), 1.08 (s, 9H), 1.06 (s, 9H).  $^{19}\text{F NMR}$  (376 MHz,  $\text{CDCl}_3$ )  $\delta$  -57.83 (s).  $^{13}\text{C NMR}$  (100 MHz,  $\text{CDCl}_3$ )  $\delta$  215.4, 185.4, 149.1, 148.9, 148.7, 140.9, 138.4, 137.4, 136.4, 134.7, 131.1, 128.6, 127.9, 127.7, 121.3 (q,  $J_{\text{CF}} = 256$  Hz), 119.2, 116.7, 69.1, 55.7, 47.6, 41.4, 35.32, 35.25, 29.3, 29.0. **IR**  $\nu_{\text{max}}/\text{cm}^{-1}$  2957, 2913, 2867, 1744, 1658, 1637, 1506, 1256, 1215, 1170. **HRMS** (ESI):  $m/z$   $[\text{M}+\text{H}]^+$  calculated for  $[\text{C}_{33}\text{H}_{36}\text{F}_3\text{O}_3]^+$ : 537.2611, found: 537.2603.

The *ee* was determined by HPLC analysis: CHIRALPAK IG (4.6 mm i.d.  $\times$  250 mm); hexane/2-propanol = 97/3; flow rate 0.3 mL/min; 35 °C; 250 nm; retention time: 13.20 min (minor) and 14.52 min (major).

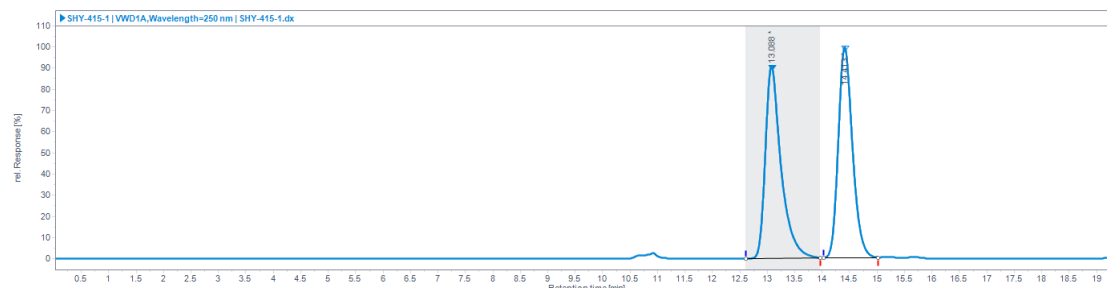

**Injection Results**

| Peak # | RT (min) | Area%  | Start time (min) | End time (min) | Symmetry |
|--------|----------|--------|------------------|----------------|----------|
| 1      | 13.088   | 50.193 | 12.611           | 13.960         | 0.71304  |
| 2      | 14.413   | 49.807 | 14.030           | 15.024         | 0.86714  |

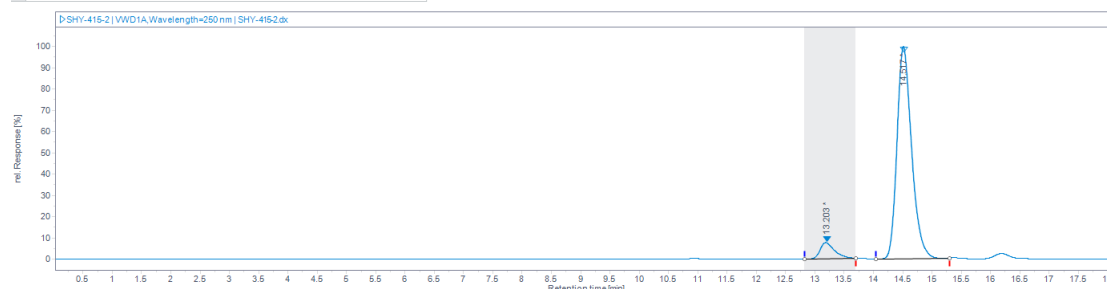

**Injection Results**

| Peak # | RT (min) | Area%  | Start time (min) | End time (min) | Symmetry |
|--------|----------|--------|------------------|----------------|----------|
| 1      | 13.203   | 7.046  | 12.820           | 13.697         | 0.76651  |
| 2      | 14.517   | 92.954 | 14.047           | 15.304         | 0.85640  |

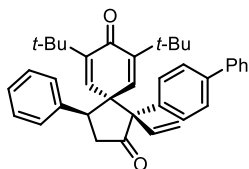

**Compound 3s:** purified by column chromatography (petroleum ether/ethyl acetate = 50:1); yellow solid, 42 mg, 76% yield, 10:1 *dr*, 89:11 *er*,  $[\alpha]_D^{20} = -141.5$  ( $c = 0.26$ ,  $\text{CHCl}_3$ );  $^1\text{H NMR}$  (400 MHz,  $\text{CDCl}_3$ )  $\delta$  7.63 (d,  $J = 7.8$  Hz, 4H), 7.47 (t,  $J = 7.4$  Hz, 2H), 7.38 (t,  $J = 7.2$  Hz, 1H), 7.25 (d,  $J = 8.0$  Hz, 2H), 7.14 (m, 3H), 6.93 (m, 2H), 6.42 (d,  $J = 2.4$  Hz, 1H), 6.32 (d,  $J = 2.4$  Hz, 1H), 5.97 (dd,  $J = 17.6, 11.2$  Hz, 1H), 5.28 (d,  $J = 11.2$  Hz, 1H), 5.17 (d,  $J = 17.6$  Hz, 1H), 3.66 (dd,  $J = 12.6, 8.8$  Hz, 1H), 3.27 (dd,  $J = 19.8, 12.6$  Hz, 1H), 3.12 (dd,  $J = 19.8, 8.8$  Hz, 1H), 1.10 (s, 9H), 1.08 (s, 9H).  $^{13}\text{C NMR}$  (100 MHz,  $\text{CDCl}_3$ )  $\delta$  215.9, 185.6, 148.9, 148.7, 141.5, 140.8, 140.2, 138.8, 137.4, 136.6, 135.0, 130.1, 129.1, 128.6, 127.9, 127.7, 127.6, 127.2, 126.9, 118.8, 69.7, 56.0, 47.7, 41.4, 35.4, 35.2, 29.3, 29.0. **IR**  $\nu_{\text{max}}/\text{cm}^{-1}$  2955, 2912, 2866, 1742, 1658, 1636, 1454, 1368, 1249, 1178, 1113. **HRMS** (ESI):  $m/z$   $[\text{M}+\text{H}]^+$  calculated for  $[\text{C}_{38}\text{H}_{41}\text{O}_2]^+$ : 529.3101, found: 529.3096.

The *ee* was determined by HPLC analysis: CHIRALPAK ADH (4.6 mm i.d.  $\times$  250 mm); hexane/2-propanol = 97/3; flow rate 0.3 mL/min; 35 °C; 250 nm; retention time: 15.55 min (minor) and 26.06 min (major).

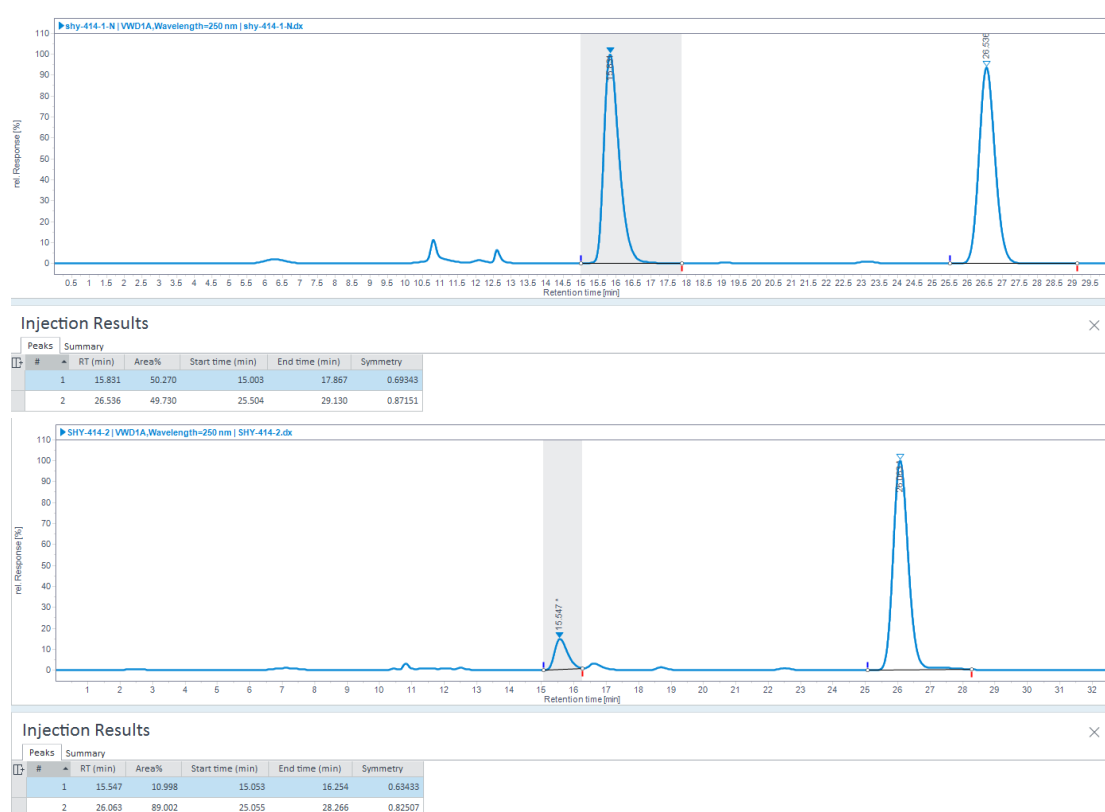

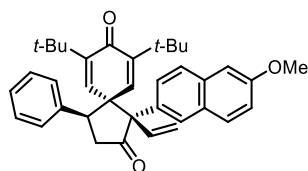

**Compound 3t:** purified by column chromatography (petroleum ether/ethyl acetate = 50:1); yellow solid, 41 mg, 74% yield, 15:1 *dr*, 90:10 *er*,  $[\alpha]_D^{20} = -166.8$  ( $c = 0.24$ ,  $\text{CHCl}_3$ );  $^1\text{H NMR}$  (400 MHz,  $\text{CDCl}_3$ )  $\delta$  7.76 (d,  $J = 8.6$  Hz, 1H), 7.71 (d,  $J = 8.8$  Hz, 1H), 7.50 (s, 1H), 7.27 - 7.13 (m, 6H), 6.89 (d,  $J = 4.4$  Hz, 2H), 6.46 (s, 1H), 6.34 (s, 1H), 5.99 (dd,  $J = 17.6, 11.2$  Hz, 1H), 5.29 (d,  $J = 11.2$  Hz, 1H), 5.14 (d,  $J = 17.6$  Hz, 1H), 3.95 (s, 3H), 3.70 - 3.58 (m, 1H), 3.29 (dd,  $J = 19.8, 12.4$  Hz, 1H), 3.18 (dd,  $J = 19.8, 8.8$  Hz, 1H), 1.09 (s, 18H).  $^{13}\text{C NMR}$  (100 MHz,  $\text{CDCl}_3$ )  $\delta$  216.0, 185.7, 158.6, 148.9, 148.7, 141.7, 138.7, 136.8, 135.1, 133.9, 133.3, 129.8, 128.7, 128.6, 128.3, 127.9, 127.7, 127.5, 126.5, 119.6, 119.3, 105.7, 70.4, 56.2, 55.5, 47.7, 41.4, 35.33, 35.25, 29.3, 29.1. **IR**  $\nu_{\text{max}}/\text{cm}^{-1}$  2954, 2908, 2865, 1738, 1657, 1633, 1601, 1482, 1454, 1243, 1221, 1164, 1032. **HRMS** (ESI):  $m/z$   $[\text{M}+\text{H}]^+$  calculated for  $[\text{C}_{37}\text{H}_{41}\text{O}_3]^+$ : 533.3050, found: 533.3054.

The *ee* was determined by HPLC analysis: CHIRALPAK ADH (4.6 mm i.d.  $\times$  250 mm); hexane/2-propanol = 97/3; flow rate 0.3 mL/min; 35 °C; 250 nm; retention time: 22.37 min (minor) and 25.64 min (major).

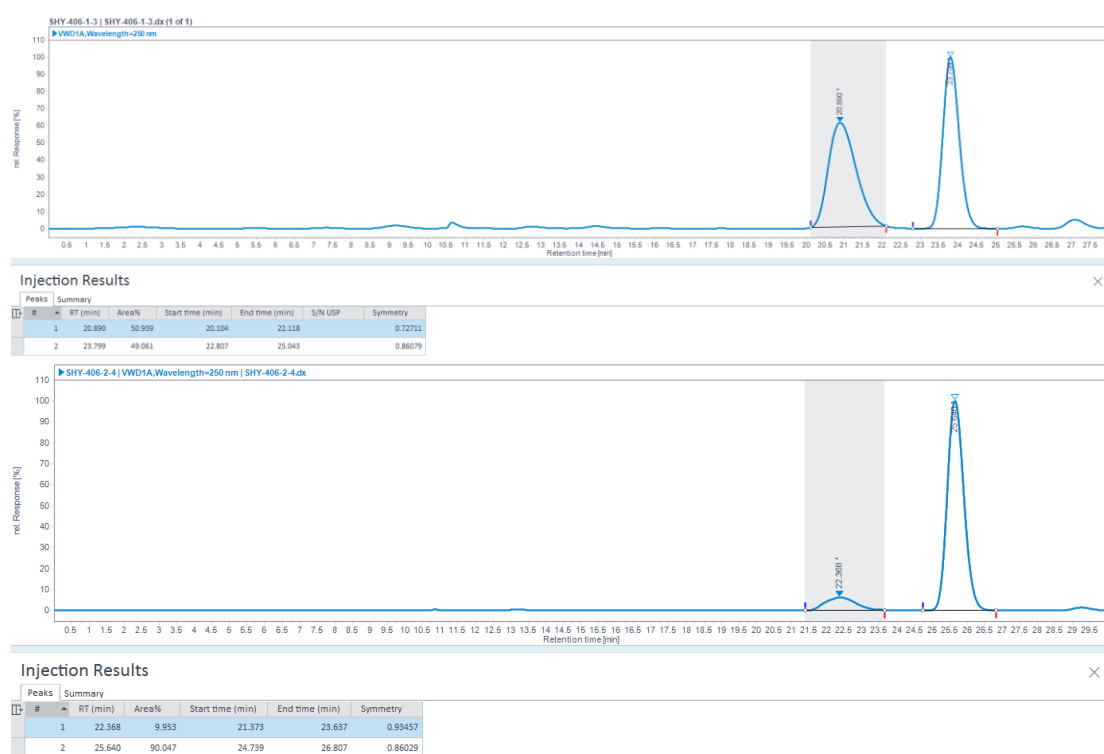

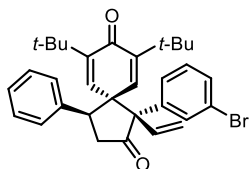

**Compound 3u:** purified by column chromatography (petroleum ether/ethyl acetate = 50:1); yellow solid, 40 mg, 68% yield, *dr* >20:1, 95:5 *er*,  $[\alpha]_D^{20} = -119.2$  ( $c = 0.12$ ,  $\text{CHCl}_3$ );  $^1\text{H NMR}$  (400 MHz,  $\text{CDCl}_3$ )  $\delta$  7.50 (d,  $J = 8.0$  Hz, 1H), 7.32-7.26 (m, 2H), 7.19 - 7.12 (m, 3H), 7.10 (d,  $J = 8.0$  Hz, 1H), 6.96 - 6.83 (m, 2H), 6.38 (d,  $J = 2.8$  Hz, 1H), 6.20 (d,  $J = 2.8$  Hz, 1H), 5.90 (dd,  $J = 17.6, 11.2$  Hz, 1H), 5.28 (d,  $J = 11.2$  Hz, 1H), 5.15 (d,  $J = 17.6$  Hz, 1H), 3.56 (dd,  $J = 12.6, 8.6$  Hz, 1H), 3.26 (dd,  $J = 19.8, 12.6$  Hz, 1H), 3.08 (dd,  $J = 19.8, 8.6$  Hz, 1H), 1.11 (s, 9H), 1.06 (s, 9H).  $^{13}\text{C NMR}$  (100 MHz,  $\text{CDCl}_3$ )  $\delta$  215.2, 185.5, 149.1, 149.0, 141.0, 138.2, 136.2, 134.8, 133.1, 131.2, 129.8, 128.5, 127.84, 127.81, 127.6, 122.6, 119.4, 69.4, 55.7, 47.6, 41.3, 35.4, 35.3, 29.3, 29.0. **IR**  $\nu_{\text{max}}/\text{cm}^{-1}$  2955, 2919, 2865, 1743, 1658, 1637, 1454, 1367, 1250, 698. **HRMS** (ESI):  $m/z$   $[\text{M}+\text{Na}]^+$  calculated for  $[\text{C}_{32}\text{H}_{35}\text{BrO}_2\text{Na}]^+$ : 553.1713, found: 553.1721.

The *ee* was determined by HPLC analysis: CHIRALPAK ADH (4.6 mm i.d.  $\times$  250 mm); hexane/2-propanol = 97/3; flow rate 0.3 mL/min; 35 °C; 250 nm; retention time: 20.48 min (minor) and 15.10 min (major).

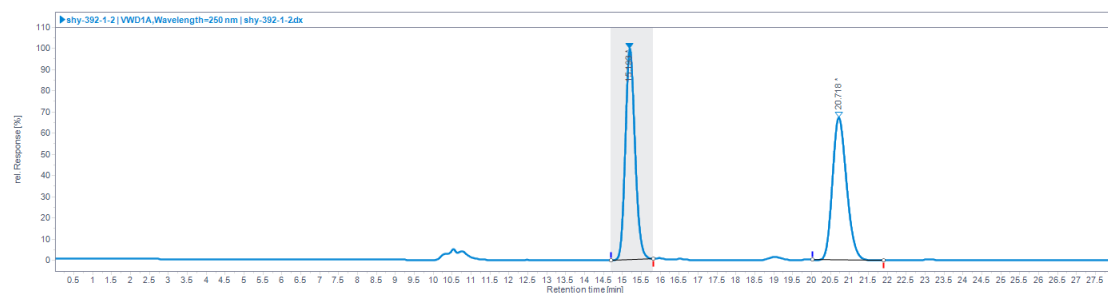

Injection Results

| Peaks | Summary  |        |                  |                |          |
|-------|----------|--------|------------------|----------------|----------|
| #     | RT (min) | Area%  | Start time (min) | End time (min) | Symmetry |
| 1     | 15.193   | 50.383 | 14.697           | 15.808         | 0.88286  |
| 2     | 20.718   | 49.617 | 20.012           | 21.896         | 0.82672  |

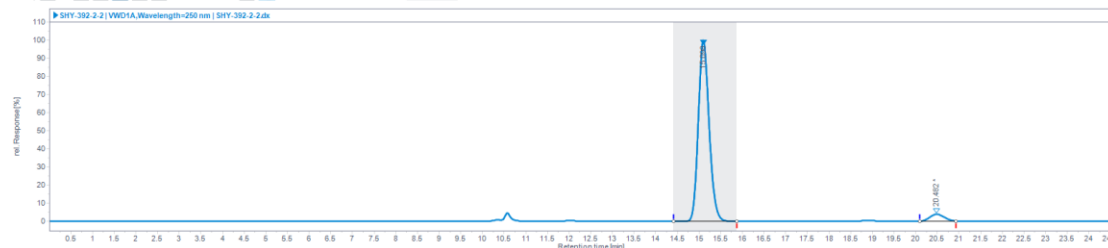

Injection Results

| Peaks | Summary  |        |                  |                |          |
|-------|----------|--------|------------------|----------------|----------|
| #     | RT (min) | Area%  | Start time (min) | End time (min) | Symmetry |
| 1     | 15.098   | 95.120 | 14.411           | 15.870         | 0.89048  |
| 2     | 20.482   | 4.880  | 20.085           | 20.920         | 0.91981  |

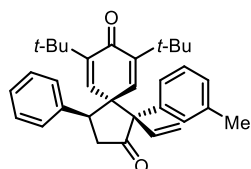

**Compound 3v:** purified by column chromatography (petroleum ether/ethyl acetate = 50:1); yellow solid, 40 mg, 84% yield, 14:1 *dr*, 90.5:9.5 *er*,  $[\alpha]_D^{20} = -111.2$  ( $c = 0.25$ ,  $\text{CHCl}_3$ );  $^1\text{H NMR}$  (400 MHz,  $\text{CDCl}_3$ )  $\delta$  7.30 - 7.26 (m, 1H), 7.17 - 7.14 (m, 4H), 6.97 - 6.91 (m, 4H), 6.40 (s, 1H), 6.27 (s, 1H), 5.93 (dd,  $J = 17.6, 11.2$  Hz, 1H), 5.24 (d,  $J = 11.2$  Hz, 1H), 5.13 (d,  $J = 17.6$  Hz, 1H), 3.65 - 3.55 (m, 1H), 3.24 (dd,  $J = 19.6, 12.6$  Hz, 1H), 3.08 (dd,  $J = 19.6, 8.6$  Hz, 1H), 2.38 (s, 3H), 1.09 (s, 9H), 1.06 (s, 9H).  $^{13}\text{C NMR}$  (100 MHz,  $\text{CDCl}_3$ )  $\delta$  216.1, 185.6, 148.64, 148.55, 141.8, 138.9, 138.3, 138.0, 136.7, 135.1, 130.5, 128.8, 128.6, 128.2, 127.7, 127.6, 126.6, 118.5, 69.9, 55.8, 47.6, 41.5, 35.3, 35.2, 29.3, 29.0, 21.8. **IR**  $\nu_{\text{max}}/\text{cm}^{-1}$  2955, 2919, 2865, 1743, 1658, 1637, 1454, 1367, 1250, 698. **HRMS** (ESI):  $m/z$   $[\text{M}+\text{K}]^+$  calculated for  $[\text{C}_{33}\text{H}_{38}\text{O}_2\text{K}]^+$ : 505.2503, found: 505.2502.

The *ee* was determined by HPLC analysis: CHIRALPAK ADH (4.6 mm i.d.  $\times$  250 mm); hexane/2-propanol = 97/3; flow rate 0.3 mL/min; 35 °C; 250 nm; retention time: 17.79 min (minor) and 14.94 min (major).

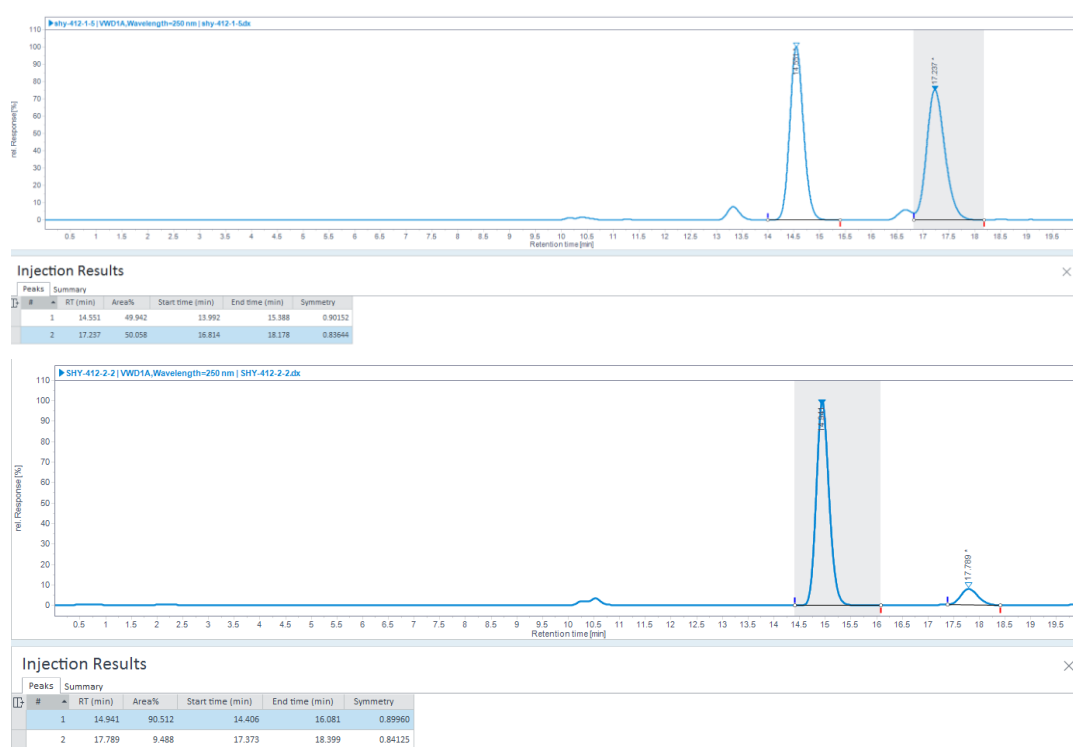

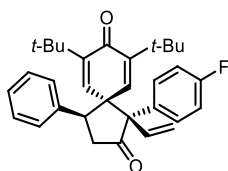

**Compound 3w:** purified by column chromatography (petroleum ether/ethyl acetate = 50:1); yellow solid, 35 mg, 69% yield, 11:1 *dr*, 93:7 *er*,  $[\alpha]_D^{20} = -134.4$  ( $c = 0.28$ ,  $\text{CHCl}_3$ );  $^1\text{H NMR}$  (400 MHz,  $\text{CDCl}_3$ )  $\delta$  7.18 - 7.08 (m, 7H), 6.90 (d,  $J = 4.4$  Hz, 2H), 6.39 (d,  $J = 2.4$  Hz, 1H), 6.19 (d,  $J = 2.4$  Hz, 1H), 5.92 (dd,  $J = 17.6, 11.2$  Hz, 1H), 5.26 (d,  $J = 11.2$  Hz, 1H), 5.11 (d,  $J = 17.6$  Hz, 1H), 3.56 (dd,  $J = 12.6, 8.6$  Hz, 1H), 3.25 (dd,  $J = 19.6, 12.6$  Hz, 1H), 3.07 (dd,  $J = 19.6, 8.6$  Hz, 1H), 1.08 (s, 9H), 1.06 (s, 9H).  $^{19}\text{F NMR}$  (376 MHz,  $\text{CDCl}_3$ )  $\delta$  -113.49 (s).  $^{13}\text{C NMR}$  (100 MHz,  $\text{CDCl}_3$ )  $\delta$  215.7, 185.5, 162.1 (d,  $J_{\text{CF}} = 248$  Hz), 149.02, 148.8, 141.1, 138.6, 136.7, 134.8, 134.3 (d,  $J_{\text{CF}} = 4$  Hz), 131.4 (d,  $J_{\text{CF}} = 8$  Hz), 128.6, 127.8, 127.6, 119.0, 115.4 (d,  $J = 22$  Hz), 69.2, 55.8, 47.6, 41.3, 35.3, 35.2, 29.3, 29.0. **IR**  $\nu_{\text{max}}/\text{cm}^{-1}$  2954, 2921, 2865, 1745, 1633, 1507, 1366, 1229, 1170, 928. **HRMS** (ESI):  $m/z$   $[\text{M}+\text{H}]^+$  calculated for  $[\text{C}_{32}\text{H}_{36}\text{FO}_2]^+$ : 471.2694, found: 471.2692.

The *ee* was determined by HPLC analysis: CHIRALPAK ADH (4.6 mm i.d.  $\times$  250 mm); hexane/2-propanol = 97/3; flow rate 0.2 mL/min; 35 °C; 250 nm; retention time: 22.40 min (minor) and 24.16 min (major).

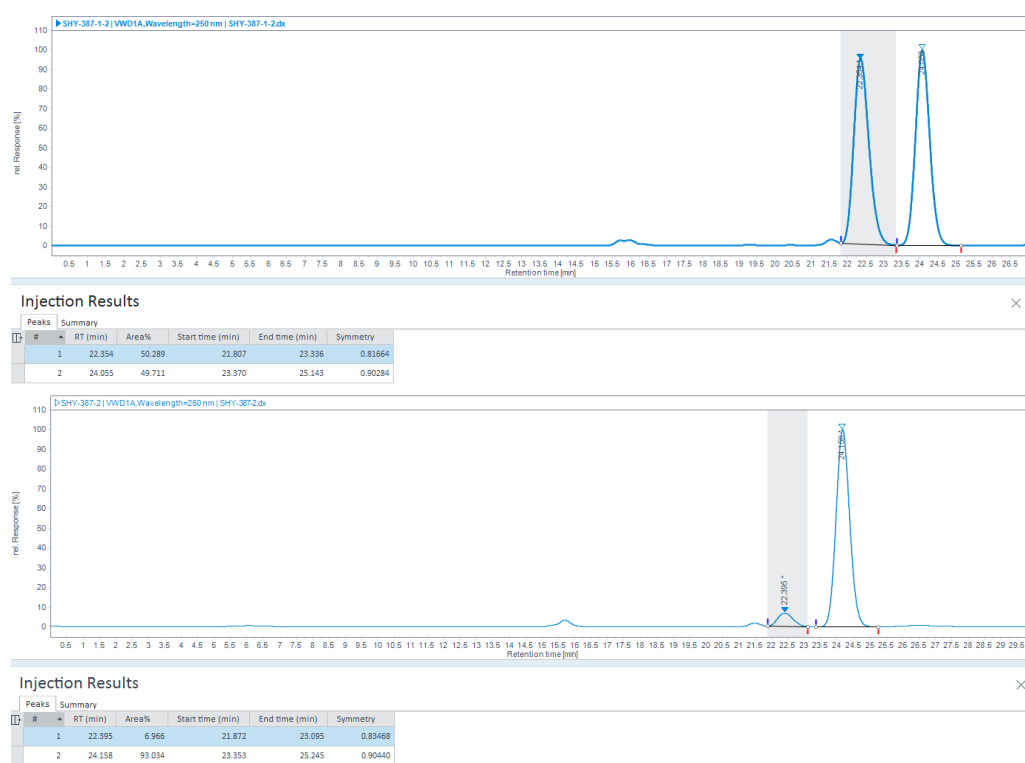

## 6. Synthetic Transformations and Gram-Scale Synthesis of Product 3a.

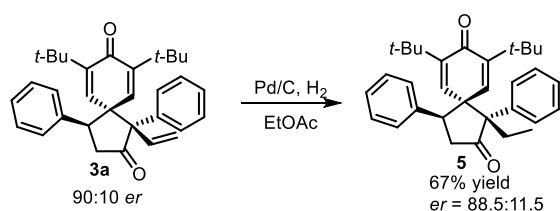

To a solution of product **3a** (45 mg, 0.1 mmol, 1.0 eq) in EtOAc (2 mL) was carefully added Pd/C (4.5 mg, 10%). The reaction mixture was degassed and purged with hydrogen. The reaction was allowed to stir for 4h at room temperature. After the completion of the reaction, the mixture was filtered through a celite pad and washed with EtOAc. The solvents were removed and concentrated under reduced pressure and purified by column chromatography to afford the desired product **5** as a colorless oil (67 % yield, *er* = 88.5:11.5).

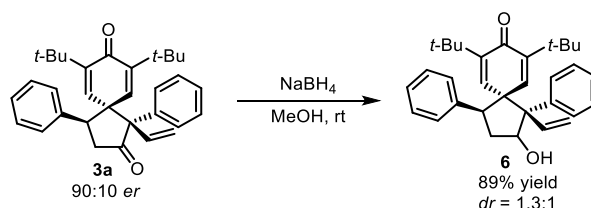

To a well-stirred solution of product **3a** (45 mg, 0.1 mmol, 1.0 eq) in MeOH (2 mL) was added NaBH<sub>4</sub> (14.8 mg, 0.5 mmol, 4.0 eq.). The reaction mixture was stirred for 2h at room temperature. After the completion of the reaction (monitored by TLC), water (2 mL) was added. The mixture was extracted with ethyl acetate (3 × 2 mL). The combined organic layers were washed with brine, dried over Na<sub>2</sub>SO<sub>4</sub>. After concentration in vacuo, the resulting residue was purified by column chromatography to give the corresponding alcohol **6** (89% yield, *dr* = 1.3:1, 69:31 *er* (major); 58.5:41.5 *er* (mino)).

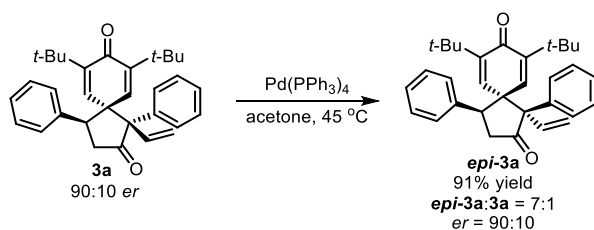

To a solution of product **3a** (45 mg, 0.1 mmol, 1.0 eq) in acetone (2 mL) was added Pd(PPh<sub>3</sub>)<sub>4</sub> (5.8 mg, 5 mol%) under N<sub>2</sub>. The reaction was allowed to stir for 20 h at 45

°C. After the completion of the reaction, the solvents were removed and concentrated under reduced pressure, and then purified by column chromatography to afford the desired product **epi-3a** as a yellow solid (91 % yield, **epi-3a:3a** = 7:1, *er* = 90:10).

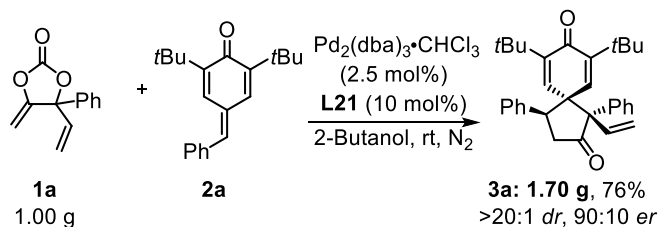

In the glovebox, to a round-bottomed flask with a dried stir bar was added  $\text{Pd}_2(\text{dba})_3\cdot\text{CHCl}_3$  (0.13g, 0.12 mmol), ligand **L21** (0.25g, 0.5 mmol), anhydrous 2-Butanol (5 mL). The reaction mixture was then allowed to stir for 1 h at room temperature, followed by the addition of cyclic carbonate **1a** (1.00 g, 4.95 mmol) and *para*-quinone methide **2a** (2.2 g, 7.43 mmol). Then, the reaction mixture was allowed to stir at room temperature until the starting material disappeared (monitored by TLC) in the glovebox. The crude reaction mixture was concentrated under reduced pressure and directly purified by silica gel (chromatography petroleum ether/ethyl acetate = 50:1) to give **3a** (1.70 g, 3.76 mmol, 76%, >20:1 *dr*, 90:10 *er*) as a yellow solid. The *dr* value was determined by  $^1\text{H}$  NMR spectrum of the crude reaction mixture. The enantiopurity of the product was analyzed by HPLC.

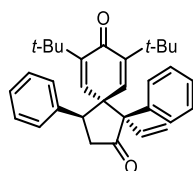

**Compound epi-3a:** yellow solid,  $[\alpha]_D^{20} = -86.2$  ( $c = 0.33$ ,  $\text{CHCl}_3$ );  $^1\text{H}$  NMR (400 MHz,  $\text{CDCl}_3$ )  $\delta$  7.20 - 7.12 (m, 8H), 7.03 - 7.01 (m, 3H), 6.57 (dd,  $J = 17.2, 10.8$  Hz, 1H), 6.15 (s, 1H), 5.52 (d,  $J = 10.8$  Hz, 1H), 5.19 (d,  $J = 17.2$  Hz, 1H), 3.91 (dd,  $J = 12.4, 8.8$  Hz, 1H), 3.21 (dd,  $J = 19.6, 12.4$  Hz, 1H), 3.09 (dd,  $J = 19.6, 8.6$  Hz, 1H), 1.23 (s, 9H), 0.69 (s, 9H);  $^{13}\text{C}$  NMR (100 MHz,  $\text{CDCl}_3$ )  $\delta$  213.3, 185.1, 151.0, 147.8, 139.1, 138.4, 138.1, 135.7, 135.3, 128.2, 127.9, 127.73, 127.70, 127.34, 127.25, 120.7, 70.7, 57.0, 47.0, 40.8, 35.4, 34.6, 29.4, 28.5. IR  $\nu_{\text{max}}/\text{cm}^{-1}$  2954, 2911, 2865, 1737, 1659, 1636, 1454, 1358, 1251, 1112, 930. HRMS (ESI):  $m/z$   $[\text{M}+\text{H}]^+$  calculated for  $[\text{C}_{32}\text{H}_{37}\text{O}_2]^+$ : 453.2794, found:453.2794.



The *ee* was determined by HPLC analysis: CHIRALPAK ADH (4.6 mm i.d. × 250 mm); hexane/2-propanol = 97/3; flow rate 0.3 mL/min; 35 °C; 250 nm; retention time: 14.85 min (minor) and 16.47 min (major).

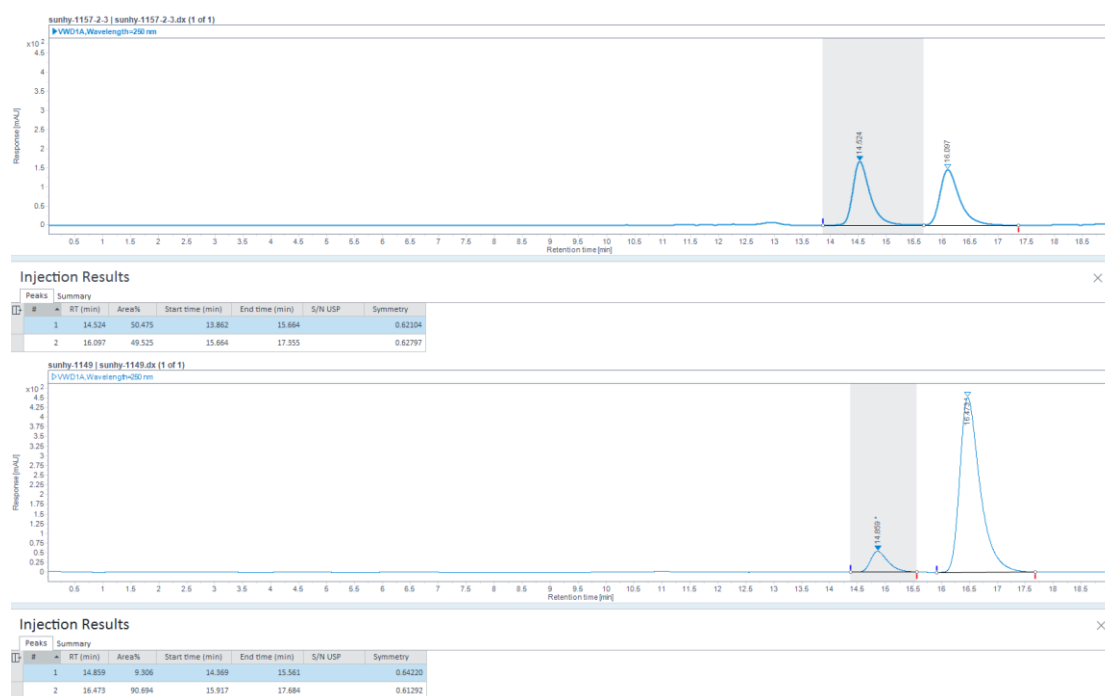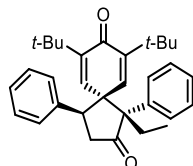

**Compound 5:** colorless oil;  $[\alpha]_D^{20} = -171.1$  ( $c = 0.09$ ,  $\text{CHCl}_3$ );  $^1\text{H NMR}$  (400 MHz,  $\text{CDCl}_3$ )  $\delta$  7.42 - 7.34 (m, 3H), 7.13 - 7.06 (m, 5H), 6.98 - 6.90 (m, 2H), 6.44 (s, 1H), 6.21 (s, 1H), 3.56 (dd,  $J = 12.0, 8.8$  Hz, 1H), 3.20 (dd,  $J = 19.6, 12.0$  Hz, 1H), 3.09 (dd,  $J = 19.6, 8.8$  Hz, 1H), 1.73 - 1.71 (m, 1H), 1.49 - 1.43 (m, 1H), 1.12 (s, 9H), 1.08 (s, 9H), 0.79 (t,  $J = 7.2$  Hz);  $^{13}\text{C NMR}$  (100 MHz,  $\text{CDCl}_3$ )  $\delta$  219.7, 186.1, 148.8, 148.7, 141.7, 137.8, 136.7, 136.0, 129.4, 128.3, 128.0, 127.8, 127.6, 67.9, 56.8, 47.6, 35.4, 35.3, 29.3, 29.2, 27.0, 9.6.; **IR**  $\nu_{\text{max}}/\text{cm}^{-1}$  2954, 2922, 2863, 1739, 1658, 1636, 1454, 1357, 1275, 1259, 764, 749, 698. **HRMS** (ESI):  $m/z$   $[\text{M}+\text{H}]^+$  calculated for  $[\text{C}_{32}\text{H}_{39}\text{O}_2]^+$ : 455.2950, found:455.2951.

The *ee* was determined by HPLC analysis: CHIRALPAK ODH (4.6 mm i.d. × 250 mm); hexane/2-propanol = 95/5; flow rate 0.5 mL/min; 35 °C; 250 nm; retention time: 9.04 min (minor) and 8.32 min (major).

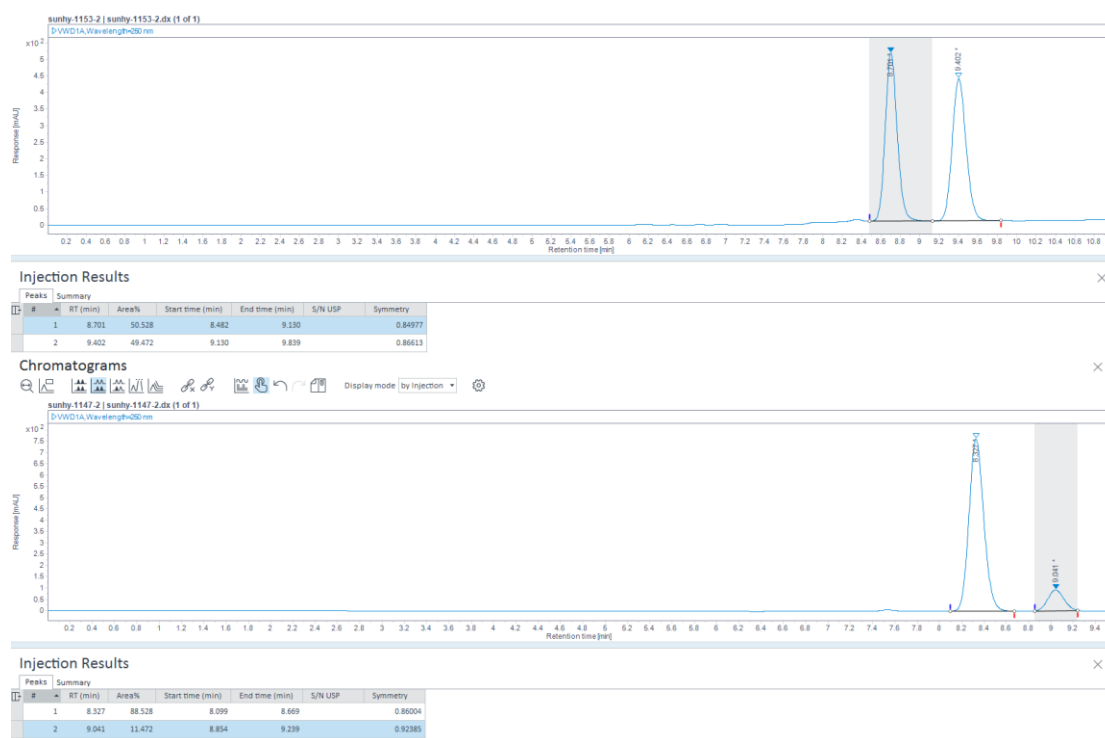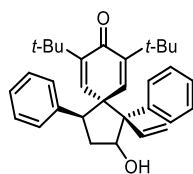

**Compound 6:** white solid;  $[\alpha]_D^{20} = -134.5$  ( $c = 0.29$ ,  $\text{CHCl}_3$ );  $^1\text{H NMR}$  (400 MHz,  $\text{CDCl}_3$ ) (major diastereomer)  $\delta$  7.38 – 6.97 (m, 10H), 6.86 (s, 1H), 6.29 (dd,  $J = 17.6$ , 11.2 Hz, 1H), 6.00 (s, 1H), 5.26 (d,  $J = 11.2$  Hz, 1H), 5.04 – 4.99 (m, 1H), 4.84 (d,  $J = 17.6$  Hz, 1H), 3.45 (dd,  $J = 11.2$ , 9.2 Hz, 1H), 2.88 – 2.80 (m, 1H), 2.71 – 2.65 (m, 1H), 0.99 (s, 9H), 0.95 (s, 9H);  $^1\text{H NMR}$  (400 MHz,  $\text{CDCl}_3$ ) (minor diastereomer)  $\delta$  7.38 – 6.97 (m, 10H), 6.49 (s, 1H), 6.18 (s, 1H), 6.11 (dd,  $J = 17.2$ , 10.8 Hz, 1H), 5.14 (d,  $J = 10.8$  Hz, 1H), 5.17 – 5.10 (m, 1H), 4.99 (d,  $J = 17.2$  Hz, 1H), 3.90 (t,  $J = 10.0$  Hz, 1H), 3.18 – 3.10 (m, 1H), 2.60 – 2.54 (m, 1H), 1.04 (s, 9H), 0.97 (s, 9H);  $^{13}\text{C NMR}$  (100 MHz,  $\text{CDCl}_3$ )  $\delta$  186.3, 186.2, 147.2, 147.0, 146.6, 145.3, 145.2, 145.1, 142.7, 142.2, 141.5, 141.3, 140.0, 139.3, 138.4, 138.3, 130.2, 129.1, 128.3, 128.2, 128.0, 127.9, 127.8, 127.3, 127.23, 127.17, 127.1, 121.4, 115.1, 78.1, 76.0, 66.1, 65.3, 57.2, 55.3, 51.6, 50.7, 37.8, 37.6, 35.1, 35.0, 34.9, 34.6, 29.3, 29.24, 29.16, 29.08. **IR**  $\nu_{\text{max}}/\text{cm}^{-1}$  3498, 3462, 2951, 2920, 1616, 1454, 1367, 1262, 1104, 908, 879, 755, 696. **HRMS** (ESI):  $m/z$   $[\text{M}+\text{H}]^+$  calculated for  $[\text{C}_{32}\text{H}_{39}\text{O}_2]^+$ : 455.2950, found: 455.2955.

The *ee* was determined by HPLC analysis: CHIRALPAK ODH (4.6 mm i.d. × 250 mm); hexane/2-propanol = 95/5; flow rate 0.5 mL/min; 35 °C; 250 nm; retention time: 16.76 min, 24.28 min (minor) and 13.56, 15.23 min (major).

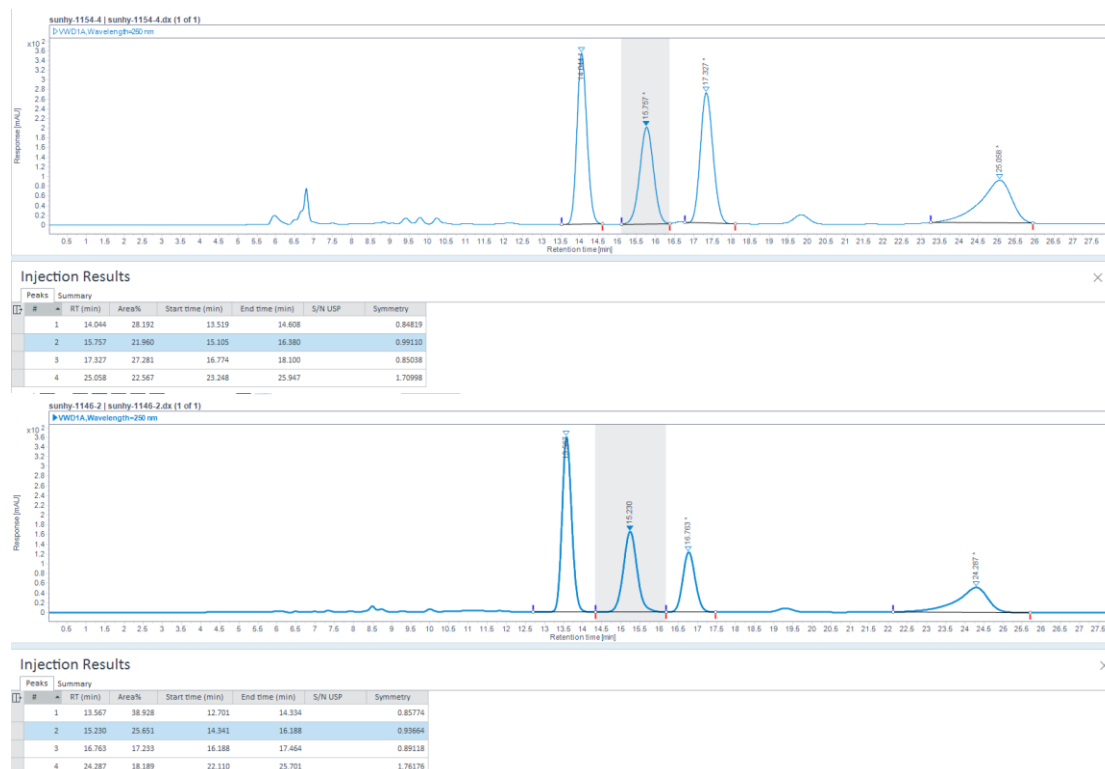

## 7. Methods for the Crystallization of Products **3a** and *epi-3a*.

**Method for the crystallization of **3a**:** Suitable crystals were obtained by slowly evaporation of a clear solution of **3a** in a mixture of petroleum ether and ethyl acetate at ambient temperature.

**Method for the crystallization of *epi-3a*:** Suitable crystals were obtained by slowly evaporation of a solution of compound *epi-3a* in a mixture of dichloromethane and petroleum ether at ambient temperature.

## 8. Crystal Data of 3a.

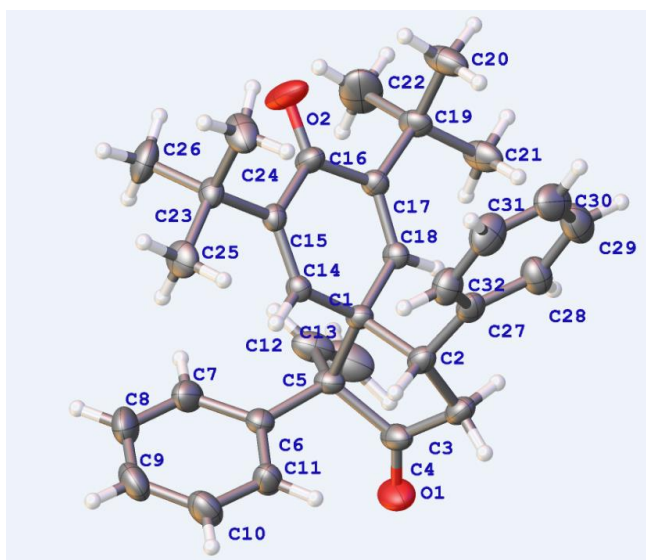

**Table 1** Crystal data and structure refinement for **3a**.

|                                  |                                                |
|----------------------------------|------------------------------------------------|
| Identification code              | pqm                                            |
| Empirical formula                | C <sub>32</sub> H <sub>36</sub> O <sub>2</sub> |
| Formula weight                   | 452.61                                         |
| Temperature/K                    | 149.99(10)                                     |
| Crystal system                   | monoclinic                                     |
| Space group                      | P2 <sub>1</sub>                                |
| a/Å                              | 9.42205(16)                                    |
| b/Å                              | 10.89247(16)                                   |
| c/Å                              | 12.9779(2)                                     |
| $\alpha$ /°                      | 90                                             |
| $\beta$ /°                       | 94.5745(14)                                    |
| $\gamma$ /°                      | 90                                             |
| Volume/Å <sup>3</sup>            | 1327.67(4)                                     |
| Z                                | 2                                              |
| $\rho_{\text{calc}}/\text{cm}^3$ | 1.132                                          |
| $\mu/\text{mm}^{-1}$             | 0.529                                          |
| F(000)                           | 488.0                                          |

|                                             |                                                               |
|---------------------------------------------|---------------------------------------------------------------|
| Crystal size/mm <sup>3</sup>                | 0.13 × 0.12 × 0.11                                            |
| Radiation                                   | Cu Kα (λ = 1.54184)                                           |
| 2θ range for data collection/°              | 6.832 to 147.53                                               |
| Index ranges                                | -11 ≤ h ≤ 11, -13 ≤ k ≤ 13, -15 ≤ l ≤ 15                      |
| Reflections collected                       | 10014                                                         |
| Independent reflections                     | 4960 [R <sub>int</sub> = 0.0207, R <sub>sigma</sub> = 0.0220] |
| Data/restraints/parameters                  | 4960/1/322                                                    |
| Goodness-of-fit on F <sup>2</sup>           | 1.038                                                         |
| Final R indexes [I ≥ 2σ (I)]                | R <sub>1</sub> = 0.0318, wR <sub>2</sub> = 0.0860             |
| Final R indexes [all data]                  | R <sub>1</sub> = 0.0323, wR <sub>2</sub> = 0.0866             |
| Largest diff. peak/hole / e Å <sup>-3</sup> | 0.20/-0.14                                                    |
| Flack/Hoof parameter                        | 0.02(10)/0.06(9)                                              |

### Crystal structure determination of 3a

**Crystal Data** for C<sub>32</sub>H<sub>36</sub>O<sub>2</sub> (*M* = 452.61 g/mol): monoclinic, space group P2<sub>1</sub> (no. 4), *a* = 9.42205(16) Å, *b* = 10.89247(16) Å, *c* = 12.9779(2) Å, β = 94.5745(14)°, *V* = 1327.67(4) Å<sup>3</sup>, *Z* = 2, *T* = 149.99(10) K, μ(Cu Kα) = 0.529 mm<sup>-1</sup>, *D*<sub>calc</sub> = 1.132 g/cm<sup>3</sup>, 10014 reflections measured (6.832° ≤ 2θ ≤ 147.53°), 4960 unique (*R*<sub>int</sub> = 0.0207, *R*<sub>sigma</sub> = 0.0220) which were used in all calculations. The final *R*<sub>1</sub> was 0.0318 (*I* > 2σ(*I*)) and *wR*<sub>2</sub> was 0.0866 (all data).

**Table 2 Fractional Atomic Coordinates (×10<sup>4</sup>) and Equivalent Isotropic Displacement Parameters (Å<sup>2</sup>×10<sup>3</sup>) for 3a. U<sub>eq</sub> is defined as 1/3 of the trace of the orthogonalised U<sub>ij</sub> tensor.**

| Atom | <i>x</i>   | <i>y</i>   | <i>z</i>   | U(eq)   |
|------|------------|------------|------------|---------|
| O1   | 3130(2)    | 1328.1(13) | 4139.9(13) | 54.4(4) |
| O2   | 2344(2)    | 6958.7(15) | 740.1(12)  | 64.8(5) |
| C1   | 3608.7(17) | 4279.0(14) | 2885.7(12) | 24.6(3) |
| C2   | 5129.7(19) | 3854.2(16) | 3352.7(13) | 29.6(3) |
| C3   | 5005(2)    | 2456.5(17) | 3396.4(14) | 35.0(4) |
| C4   | 3521(2)    | 2232.5(16) | 3706.8(14) | 35.3(4) |
| C5   | 2555.0(18) | 3353.4(15) | 3427.1(13) | 28.2(3) |
| C6   | 2034.5(18) | 3920.4(15) | 4408.0(13) | 28.5(3) |

**Table 2 Fractional Atomic Coordinates ( $\times 10^4$ ) and Equivalent Isotropic Displacement Parameters ( $\text{\AA}^2 \times 10^3$ ) for 3a.  $U_{\text{eq}}$  is defined as 1/3 of the trace of the orthogonalised  $U_{ij}$  tensor.**

| Atom | <i>x</i>   | <i>y</i>   | <i>z</i>   | $U(\text{eq})$ |
|------|------------|------------|------------|----------------|
| C7   | 781(2)     | 4602(2)    | 4380.9(16) | 42.3(4)        |
| C8   | 406(2)     | 5241(2)    | 5241(2)    | 52.6(6)        |
| C9   | 1273(3)    | 5214(2)    | 6148.9(18) | 49.9(5)        |
| C10  | 2496(2)    | 4523(2)    | 6201.1(16) | 46.7(5)        |
| C11  | 2871(2)    | 3877(2)    | 5344.0(14) | 38.4(4)        |
| C12  | 1326(2)    | 3016(2)    | 2659.4(15) | 42.4(5)        |
| C13  | 1007(4)    | 1930(3)    | 2273(2)    | 64.9(8)        |
| C14  | 3350.5(16) | 5582.2(14) | 3158.7(12) | 23.7(3)        |
| C15  | 2960.3(16) | 6475.5(14) | 2494.1(12) | 24.2(3)        |
| C16  | 2765.2(19) | 6176.1(15) | 1371.8(13) | 31.6(4)        |
| C17  | 3112.3(17) | 4912.8(14) | 1032.3(12) | 25.9(3)        |
| C18  | 3487.3(16) | 4070.5(14) | 1747.0(12) | 24.4(3)        |
| C19  | 3010(2)    | 4618.8(16) | -126.1(13) | 32.5(4)        |
| C20  | 4011(3)    | 5467(2)    | -675.7(16) | 51.8(6)        |
| C21  | 3468(3)    | 3302.5(18) | -333.3(14) | 44.3(5)        |
| C22  | 1467(3)    | 4766(3)    | -573.3(18) | 66.0(8)        |
| C23  | 2721.1(17) | 7801.2(14) | 2841.6(13) | 28.5(3)        |
| C24  | 3755(3)    | 8656.3(18) | 2343.5(19) | 49.3(5)        |
| C25  | 2987(2)    | 7929.8(17) | 4015.0(15) | 40.9(4)        |
| C26  | 1178(2)    | 8187(2)    | 2545(2)    | 48.3(5)        |
| C27  | 6324.8(17) | 4391.6(17) | 2792.7(13) | 32.0(4)        |
| C28  | 6860(2)    | 3830(2)    | 1944.2(16) | 42.1(4)        |
| C29  | 7896(2)    | 4404(3)    | 1404.4(18) | 51.3(5)        |
| C30  | 8412(2)    | 5541(3)    | 1709.9(19) | 53.4(6)        |
| C31  | 7904(2)    | 6101(2)    | 2558(2)    | 51.3(6)        |

**Table 2 Fractional Atomic Coordinates ( $\times 10^4$ ) and Equivalent Isotropic Displacement Parameters ( $\text{\AA}^2 \times 10^3$ ) for 3a.  $U_{\text{eq}}$  is defined as 1/3 of the trace of the orthogonalised  $U_{ij}$  tensor.**

| Atom | $x$        | $y$        | $z$        | $U(\text{eq})$ |
|------|------------|------------|------------|----------------|
| C32  | 6874.8(19) | 5530.8(19) | 3097.0(16) | 39.3(4)        |

**Table 3 Anisotropic Displacement Parameters ( $\text{\AA}^2 \times 10^3$ ) for 3a. The Anisotropic displacement factor exponent takes the form:  $-2\pi^2[h^2a^{*2}U_{11}+2hka^*b^*U_{12}+\dots]$ .**

| Atom | $U_{11}$  | $U_{22}$ | $U_{33}$ | $U_{23}$ | $U_{13}$ | $U_{12}$  |
|------|-----------|----------|----------|----------|----------|-----------|
| O1   | 78.1(11)  | 30.5(7)  | 57.8(10) | 13.2(7)  | 25.9(8)  | 6.8(7)    |
| O2   | 119.0(15) | 43.0(9)  | 30.2(7)  | 4.4(6)   | -7.0(8)  | 38.1(9)   |
| C1   | 30.2(7)   | 22.6(7)  | 20.7(7)  | 0.6(6)   | 0.6(5)   | 1.4(6)    |
| C2   | 34.7(8)   | 28.6(8)  | 24.8(8)  | -1.1(6)  | -1.8(6)  | 6.0(6)    |
| C3   | 43.3(9)   | 30.1(9)  | 31.0(8)  | 3.4(7)   | 0.4(7)   | 11.2(7)   |
| C4   | 54.0(11)  | 25.8(8)  | 26.9(8)  | 1.7(7)   | 8.4(7)   | 3.9(7)    |
| C5   | 35.8(8)   | 25.2(7)  | 23.6(8)  | 2.6(6)   | 2.9(6)   | -1.8(6)   |
| C6   | 31.2(8)   | 28.1(8)  | 26.7(8)  | 4.8(6)   | 6.5(6)   | 0.3(6)    |
| C7   | 31.9(9)   | 54.9(11) | 40.9(10) | 10.8(9)  | 7.4(7)   | 7.7(8)    |
| C8   | 43.5(11)  | 59.3(14) | 58.3(14) | 8.1(11)  | 24.4(9)  | 17.6(10)  |
| C9   | 56.6(13)  | 51.9(12) | 44.7(12) | -4.4(9)  | 26.9(10) | 2.6(10)   |
| C10  | 49.2(11)  | 61.2(13) | 30.6(10) | -4.4(9)  | 8.4(8)   | 2.0(10)   |
| C11  | 37.1(9)   | 49.2(11) | 28.8(9)  | 0.2(8)   | 2.8(7)   | 11.1(8)   |
| C12  | 45.4(10)  | 49.2(11) | 31.9(9)  | 4.2(8)   | -1.8(7)  | -17.2(9)  |
| C13  | 79.1(18)  | 63.4(16) | 51.4(14) | -4.3(12) | 0.4(13)  | -38.5(14) |
| C14  | 25.6(7)   | 24.8(7)  | 20.6(7)  | -3.4(6)  | 2.1(5)   | -0.2(6)   |
| C15  | 24.1(7)   | 22.6(7)  | 26.3(8)  | -2.2(6)  | 4.7(5)   | 0.5(6)    |
| C16  | 41.5(9)   | 27.9(8)  | 24.8(8)  | 1.4(7)   | -0.6(7)  | 8.5(7)    |
| C17  | 29.0(8)   | 27.7(8)  | 20.7(7)  | -2.1(6)  | 0.1(6)   | 0.4(6)    |
| C18  | 29.6(7)   | 21.4(7)  | 22.1(7)  | -3.8(6)  | 1.8(6)   | -0.1(6)   |

**Table 3 Anisotropic Displacement Parameters ( $\text{\AA}^2 \times 10^3$ ) for 3a. The Anisotropic displacement factor exponent takes the form:  $-2\pi^2[h^2a^{*2}U_{11}+2hka^*b^*U_{12}+\dots]$ .**

| Atom | $U_{11}$ | $U_{22}$ | $U_{33}$ | $U_{23}$  | $U_{13}$  | $U_{12}$  |
|------|----------|----------|----------|-----------|-----------|-----------|
| C19  | 44.5(10) | 33.4(9)  | 19.1(8)  | -2.2(7)   | -1.3(6)   | -0.5(7)   |
| C20  | 89.0(17) | 40.1(11) | 28.2(10) | -0.6(8)   | 16.1(10)  | -10.0(11) |
| C21  | 74.4(14) | 34.6(9)  | 24.2(9)  | -7.5(8)   | 7.0(8)    | -5.6(9)   |
| C22  | 58.1(14) | 101(2)   | 35.0(11) | -11.7(13) | -19.4(10) | 13.3(14)  |
| C23  | 29.9(8)  | 21.6(7)  | 34.7(9)  | -3.2(6)   | 6.8(6)    | 1.6(6)    |
| C24  | 59.3(13) | 28.4(9)  | 63.8(14) | -2.7(9)   | 26.4(11)  | -6.8(8)   |
| C25  | 53.7(11) | 29.9(9)  | 39.6(10) | -12.7(8)  | 7.3(8)    | -0.5(8)   |
| C26  | 40.3(10) | 39.4(11) | 64.9(14) | -9.7(10)  | 1.0(9)    | 16.3(8)   |
| C27  | 28.7(8)  | 37.1(9)  | 29.3(8)  | 0.2(7)    | -3.4(6)   | 6.9(7)    |
| C28  | 38.4(9)  | 50.3(11) | 37.8(10) | -8.6(9)   | 5.0(8)    | 2.1(8)    |
| C29  | 37.9(10) | 72.8(15) | 44.0(11) | -2.0(11)  | 8.5(8)    | 4.5(10)   |
| C30  | 30.9(10) | 70.1(15) | 59.8(14) | 15.8(12)  | 7.2(9)    | 1.5(10)   |
| C31  | 34.0(10) | 47.3(12) | 72.0(16) | 0.8(11)   | 0.2(9)    | -2.5(8)   |
| C32  | 31.4(9)  | 40.1(9)  | 45.7(11) | -5.3(8)   | -1.7(7)   | 2.8(7)    |

**Table 4 Bond Lengths for 3a.**

| Atom | Atom | Length/ $\text{\AA}$ | Atom | Atom | Length/ $\text{\AA}$ |
|------|------|----------------------|------|------|----------------------|
| O1   | C4   | 1.206(2)             | C14  | C15  | 1.332(2)             |
| O2   | C16  | 1.227(2)             | C15  | C16  | 1.490(2)             |
| C1   | C2   | 1.580(2)             | C15  | C23  | 1.535(2)             |
| C1   | C5   | 1.615(2)             | C16  | C17  | 1.489(2)             |
| C1   | C14  | 1.488(2)             | C17  | C18  | 1.332(2)             |
| C1   | C18  | 1.491(2)             | C17  | C19  | 1.533(2)             |
| C2   | C3   | 1.528(2)             | C19  | C20  | 1.536(3)             |
| C2   | C27  | 1.506(3)             | C19  | C21  | 1.527(3)             |



**Table 4 Bond Lengths for 3a.**

| Atom | Atom | Length/Å | Atom | Atom | Length/Å |
|------|------|----------|------|------|----------|
| C3   | C4   | 1.505(3) | C19  | C22  | 1.531(3) |
| C4   | C5   | 1.549(2) | C23  | C24  | 1.528(2) |
| C5   | C6   | 1.530(2) | C23  | C25  | 1.530(3) |
| C5   | C12  | 1.512(2) | C23  | C26  | 1.533(2) |
| C6   | C7   | 1.393(2) | C27  | C28  | 1.389(3) |
| C6   | C11  | 1.395(2) | C27  | C32  | 1.390(3) |
| C7   | C8   | 1.386(3) | C28  | C29  | 1.394(3) |
| C8   | C9   | 1.379(4) | C29  | C30  | 1.377(4) |
| C9   | C10  | 1.373(3) | C30  | C31  | 1.378(4) |
| C10  | C11  | 1.386(3) | C31  | C32  | 1.387(3) |
| C12  | C13  | 1.310(3) |      |      |          |

**Table 5 Bond Angles for 3a.**

| Atom | Atom | Atom | Angle/°    | Atom | Atom | Atom | Angle/°    |
|------|------|------|------------|------|------|------|------------|
| C2   | C1   | C5   | 102.75(12) | C14  | C15  | C23  | 122.43(14) |
| C14  | C1   | C2   | 110.40(13) | C16  | C15  | C23  | 118.93(14) |
| C14  | C1   | C5   | 111.98(13) | O2   | C16  | C15  | 120.63(15) |
| C14  | C1   | C18  | 112.36(13) | O2   | C16  | C17  | 120.76(16) |
| C18  | C1   | C2   | 109.34(13) | C17  | C16  | C15  | 118.61(14) |
| C18  | C1   | C5   | 109.58(12) | C16  | C17  | C19  | 119.03(14) |
| C3   | C2   | C1   | 103.63(14) | C18  | C17  | C16  | 118.86(14) |
| C27  | C2   | C1   | 113.02(13) | C18  | C17  | C19  | 122.11(14) |
| C27  | C2   | C3   | 117.89(15) | C17  | C18  | C1   | 125.49(14) |
| C4   | C3   | C2   | 104.32(15) | C17  | C19  | C20  | 109.70(14) |
| O1   | C4   | C3   | 125.56(18) | C21  | C19  | C17  | 111.86(14) |
| O1   | C4   | C5   | 123.89(18) | C21  | C19  | C20  | 106.91(16) |

**Table 5 Bond Angles for 3a.**

| Atom | Atom | Atom | Angle/°    | Atom | Atom | Atom | Angle/°    |
|------|------|------|------------|------|------|------|------------|
| C3   | C4   | C5   | 110.52(15) | C21  | C19  | C22  | 107.75(19) |
| C4   | C5   | C1   | 102.95(13) | C22  | C19  | C17  | 109.47(16) |
| C6   | C5   | C1   | 111.03(13) | C22  | C19  | C20  | 111.14(19) |
| C6   | C5   | C4   | 110.15(13) | C24  | C23  | C15  | 109.62(13) |
| C12  | C5   | C1   | 109.30(13) | C24  | C23  | C25  | 107.81(16) |
| C12  | C5   | C4   | 111.58(16) | C24  | C23  | C26  | 110.51(17) |
| C12  | C5   | C6   | 111.53(15) | C25  | C23  | C15  | 111.25(14) |
| C7   | C6   | C5   | 121.42(16) | C25  | C23  | C26  | 107.58(15) |
| C7   | C6   | C11  | 117.32(17) | C26  | C23  | C15  | 110.04(14) |
| C11  | C6   | C5   | 120.96(15) | C28  | C27  | C2   | 122.98(17) |
| C8   | C7   | C6   | 121.17(19) | C28  | C27  | C32  | 117.86(18) |
| C9   | C8   | C7   | 120.4(2)   | C32  | C27  | C2   | 119.08(16) |
| C10  | C9   | C8   | 119.4(2)   | C27  | C28  | C29  | 121.0(2)   |
| C9   | C10  | C11  | 120.4(2)   | C30  | C29  | C28  | 120.2(2)   |
| C10  | C11  | C6   | 121.29(18) | C29  | C30  | C31  | 119.4(2)   |
| C13  | C12  | C5   | 127.8(2)   | C30  | C31  | C32  | 120.4(2)   |
| C15  | C14  | C1   | 125.77(14) | C31  | C32  | C27  | 121.10(19) |
| C14  | C15  | C16  | 118.64(14) |      |      |      |            |

**Table 6 Torsion Angles for 3a.**

| A  | B   | C   | D   | Angle/°    | A   | B  | C  | D   | Angle/°    |
|----|-----|-----|-----|------------|-----|----|----|-----|------------|
| O1 | C4  | C5  | C1  | 179.27(18) | C11 | C6 | C7 | C8  | 2.0(3)     |
| O1 | C4  | C5  | C6  | 60.8(2)    | C12 | C5 | C6 | C7  | -30.8(2)   |
| O1 | C4  | C5  | C12 | -63.6(2)   | C12 | C5 | C6 | C11 | 155.66(18) |
| O2 | C16 | C17 | C18 | -176.2(2)  | C14 | C1 | C2 | C3  | 158.05(14) |
| O2 | C16 | C17 | C19 | 3.1(3)     | C14 | C1 | C2 | C27 | -73.19(17) |

**Table 6 Torsion Angles for 3a.**

| <b>A</b> | <b>B</b> | <b>C</b> | <b>D</b> | <b>Angle/°</b> | <b>A</b> | <b>B</b> | <b>C</b> | <b>D</b> | <b>Angle/°</b> |
|----------|----------|----------|----------|----------------|----------|----------|----------|----------|----------------|
| C1       | C2       | C3       | C4       | -38.06(18)     | C14      | C1       | C5       | C4       | -142.48(14)    |
| C1       | C2       | C27      | C28      | -89.1(2)       | C14      | C1       | C5       | C6       | -24.63(18)     |
| C1       | C2       | C27      | C32      | 87.41(18)      | C14      | C1       | C5       | C12      | 98.82(17)      |
| C1       | C5       | C6       | C7       | 91.36(19)      | C14      | C1       | C18      | C17      | -3.7(2)        |
| C1       | C5       | C6       | C11      | -82.18(19)     | C14      | C15      | C16      | O2       | 176.65(19)     |
| C1       | C5       | C12      | C13      | 115.8(2)       | C14      | C15      | C16      | C17      | -4.2(2)        |
| C1       | C14      | C15      | C16      | -0.4(2)        | C14      | C15      | C23      | C24      | 119.11(18)     |
| C1       | C14      | C15      | C23      | -179.76(14)    | C14      | C15      | C23      | C25      | 0.0(2)         |
| C2       | C1       | C5       | C4       | -24.01(15)     | C14      | C15      | C23      | C26      | -119.16(19)    |
| C2       | C1       | C5       | C6       | 93.84(15)      | C15      | C16      | C17      | C18      | 4.7(2)         |
| C2       | C1       | C5       | C12      | -142.71(15)    | C15      | C16      | C17      | C19      | -175.99(15)    |
| C2       | C1       | C14      | C15      | 126.60(17)     | C16      | C15      | C23      | C24      | -60.2(2)       |
| C2       | C1       | C18      | C17      | -126.64(17)    | C16      | C15      | C23      | C25      | -179.35(15)    |
| C2       | C3       | C4       | O1       | -155.0(2)      | C16      | C15      | C23      | C26      | 61.5(2)        |
| C2       | C3       | C4       | C5       | 23.0(2)        | C16      | C17      | C18      | C1       | -0.6(2)        |
| C2       | C27      | C28      | C29      | 175.32(18)     | C16      | C17      | C19      | C20      | 58.9(2)        |
| C2       | C27      | C32      | C31      | -175.37(18)    | C16      | C17      | C19      | C21      | 177.38(16)     |
| C3       | C2       | C27      | C28      | 31.9(2)        | C16      | C17      | C19      | C22      | -63.3(2)       |
| C3       | C2       | C27      | C32      | -151.61(17)    | C18      | C1       | C2       | C3       | -77.84(16)     |
| C3       | C4       | C5       | C1       | 1.22(18)       | C18      | C1       | C2       | C27      | 50.91(18)      |
| C3       | C4       | C5       | C6       | -117.24(16)    | C18      | C1       | C5       | C4       | 92.15(15)      |
| C3       | C4       | C5       | C12      | 118.33(17)     | C18      | C1       | C5       | C6       | -150.01(13)    |
| C4       | C5       | C6       | C7       | -155.26(17)    | C18      | C1       | C5       | C12      | -26.56(19)     |
| C4       | C5       | C6       | C11      | 31.2(2)        | C18      | C1       | C14      | C15      | 4.2(2)         |
| C4       | C5       | C12      | C13      | 2.6(3)         | C18      | C17      | C19      | C20      | -121.80(19)    |
| C5       | C1       | C2       | C3       | 38.48(16)      | C18      | C17      | C19      | C21      | -3.3(2)        |

**Table 6 Torsion Angles for 3a.**

| A  | B   | C   | D   | Angle/°     | A   | B   | C   | D   | Angle/°     |
|----|-----|-----|-----|-------------|-----|-----|-----|-----|-------------|
| C5 | C1  | C2  | C27 | 167.24(13)  | C18 | C17 | C19 | C22 | 116.0(2)    |
| C5 | C1  | C14 | C15 | -119.58(16) | C19 | C17 | C18 | C1  | -179.86(15) |
| C5 | C1  | C18 | C17 | 121.46(17)  | C23 | C15 | C16 | O2  | -4.0(3)     |
| C5 | C6  | C7  | C8  | -171.75(18) | C23 | C15 | C16 | C17 | 175.12(14)  |
| C5 | C6  | C11 | C10 | 171.46(18)  | C27 | C2  | C3  | C4  | -163.76(14) |
| C6 | C5  | C12 | C13 | -121.0(2)   | C27 | C28 | C29 | C30 | 0.3(3)      |
| C6 | C7  | C8  | C9  | -0.1(3)     | C28 | C27 | C32 | C31 | 1.3(3)      |
| C7 | C6  | C11 | C10 | -2.3(3)     | C28 | C29 | C30 | C31 | 0.5(3)      |
| C7 | C8  | C9  | C10 | -1.6(4)     | C29 | C30 | C31 | C32 | -0.5(3)     |
| C8 | C9  | C10 | C11 | 1.2(3)      | C30 | C31 | C32 | C27 | -0.5(3)     |
| C9 | C10 | C11 | C6  | 0.7(3)      | C32 | C27 | C28 | C29 | -1.2(3)     |

**Table 7 Hydrogen Atom Coordinates ( $\text{\AA} \times 10^4$ ) and Isotropic Displacement Parameters ( $\text{\AA}^2 \times 10^3$ ) for 3a.**

| Atom | x        | y        | z        | U(eq)   |
|------|----------|----------|----------|---------|
| H2   | 5246.71  | 4150.81  | 4067.36  | 36      |
| H3A  | 5130.96  | 2094.3   | 2726.98  | 42      |
| H3B  | 5709.22  | 2114.87  | 3902.49  | 42      |
| H7   | 184.75   | 4627.47  | 3774.61  | 51      |
| H8   | -434.84  | 5691.87  | 5206.78  | 63      |
| H9   | 1031.76  | 5659.81  | 6720.69  | 60      |
| H10  | 3075.15  | 4488.39  | 6815.05  | 56      |
| H11  | 3696.31  | 3405.61  | 5393.66  | 46      |
| H12  | 724.08   | 3655.03  | 2434.6   | 51      |
| H13A | 180(40)  | 1830(40) | 1710(30) | 89(11)  |
| H13B | 1620(50) | 1150(50) | 2510(40) | 113(15) |

**Table 7 Hydrogen Atom Coordinates ( $\text{\AA}\times 10^4$ ) and Isotropic Displacement Parameters ( $\text{\AA}^2\times 10^3$ ) for 3a.**

| Atom | x       | y       | z        | U(eq) |
|------|---------|---------|----------|-------|
| H14  | 3472.23 | 5791.89 | 3854.83  | 28    |
| H18  | 3690.4  | 3286.5  | 1516.03  | 29    |
| H20A | 3710.19 | 6303.88 | -609.29  | 78    |
| H20B | 3981.64 | 5252.14 | -1394.41 | 78    |
| H20C | 4965.04 | 5376.61 | -367.03  | 78    |
| H21A | 4434.54 | 3184.04 | -57.48   | 66    |
| H21B | 3399.82 | 3155.22 | -1064.94 | 66    |
| H21C | 2858.47 | 2740.85 | -7.84    | 66    |
| H22B | 1171.66 | 5602.11 | -494.57  | 99    |
| H22A | 863.27  | 4233.68 | -212.05  | 99    |
| H22C | 1396.66 | 4554.5  | -1293.66 | 99    |
| H24A | 4707.59 | 8349.52 | 2471.74  | 74    |
| H24B | 3695.74 | 9463.48 | 2634.04  | 74    |
| H24C | 3510.26 | 8693.22 | 1611.76  | 74    |
| H25A | 2337.25 | 7411.74 | 4347.2   | 61    |
| H25B | 2844.29 | 8768.4  | 4209.37  | 61    |
| H25C | 3947.57 | 7689.95 | 4224.74  | 61    |
| H26A | 1012.53 | 8210.25 | 1805.51  | 73    |
| H26B | 1012.5  | 8986.49 | 2822.71  | 73    |
| H26C | 541.89  | 7605.98 | 2820.34  | 73    |
| H28  | 6522.84 | 3060.9  | 1733.3   | 50    |
| H29  | 8240.22 | 4017.33 | 835.83   | 62    |
| H30  | 9097.52 | 5927.48 | 1346.68  | 64    |
| H31  | 8253.44 | 6866.34 | 2771.12  | 62    |
| H32  | 6547.18 | 5917.14 | 3671.44  | 47    |

## 9. Crystal Data of *epi*-3a.

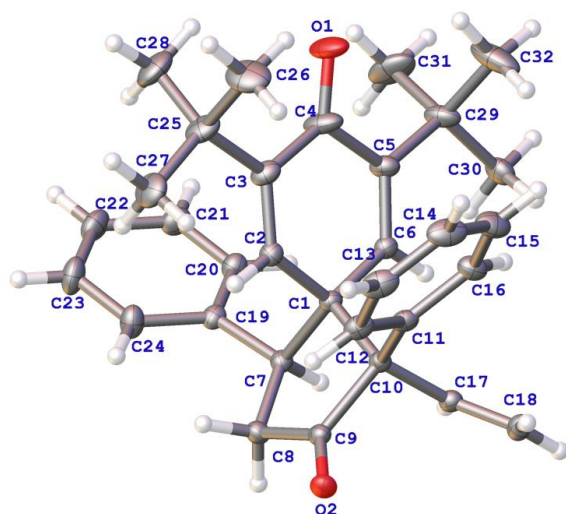

**Table 1** Crystal data and structure refinement for *epi*-3a.

|                                    |                                                |
|------------------------------------|------------------------------------------------|
| Identification code                | SHY-11                                         |
| Empirical formula                  | C <sub>32</sub> H <sub>36</sub> O <sub>2</sub> |
| Formula weight                     | 452.61                                         |
| Temperature/K                      | 149.99(10)                                     |
| Crystal system                     | orthorhombic                                   |
| Space group                        | P2 <sub>1</sub> 2 <sub>1</sub> 2 <sub>1</sub>  |
| a/Å                                | 9.38580(10)                                    |
| b/Å                                | 10.82370(10)                                   |
| c/Å                                | 26.4399(3)                                     |
| α/°                                | 90                                             |
| β/°                                | 90                                             |
| γ/°                                | 90                                             |
| Volume/Å <sup>3</sup>              | 2686.01(5)                                     |
| Z                                  | 4                                              |
| ρ <sub>calc</sub> /cm <sup>3</sup> | 1.119                                          |
| μ/mm <sup>-1</sup>                 | 0.522                                          |
| F(000)                             | 976.0                                          |

|                                             |                                                               |
|---------------------------------------------|---------------------------------------------------------------|
| Crystal size/mm <sup>3</sup>                | 0.14 × 0.12 × 0.1                                             |
| Radiation                                   | Cu Kα (λ = 1.54184)                                           |
| 2θ range for data collection/°              | 6.686 to 143.474                                              |
| Index ranges                                | -10 ≤ h ≤ 11, -10 ≤ k ≤ 13, -30 ≤ l ≤ 32                      |
| Reflections collected                       | 15182                                                         |
| Independent reflections                     | 5140 [R <sub>int</sub> = 0.0198, R <sub>sigma</sub> = 0.0200] |
| Data/restraints/parameters                  | 5140/6/333                                                    |
| Goodness-of-fit on F <sup>2</sup>           | 1.051                                                         |
| Final R indexes [I ≥ 2σ (I)]                | R <sub>1</sub> = 0.0361, wR <sub>2</sub> = 0.0937             |
| Final R indexes [all data]                  | R <sub>1</sub> = 0.0369, wR <sub>2</sub> = 0.0944             |
| Largest diff. peak/hole / e Å <sup>-3</sup> | 0.16/-0.21                                                    |
| Flack/Hooft parameter                       | 0.02(7)/0.02(7)                                               |

**Table 2 Fractional Atomic Coordinates (×10<sup>4</sup>) and Equivalent Isotropic Displacement Parameters (Å<sup>2</sup>×10<sup>3</sup>) for *epi*-3a. U<sub>eq</sub> is defined as 1/3 of the trace of the orthogonalised U<sub>ij</sub> tensor.**

| Atom | x          | y          | z          | U(eq)    |
|------|------------|------------|------------|----------|
| O1   | 7179(12)   | 5111(7)    | 4817.5(16) | 70.7(18) |
| O1B  | 7790(20)   | 4740(30)   | 4739(7)    | 86(6)    |
| O2   | 5945.1(14) | 7132.9(12) | 2185.1(5)  | 38.2(3)  |
| C1   | 6313.5(18) | 5195.8(15) | 3282.4(6)  | 27.4(3)  |
| C2   | 7532.7(19) | 5875.0(15) | 3510.4(7)  | 30.8(4)  |
| C3   | 7898(2)    | 5846.0(18) | 3996.0(7)  | 40.0(4)  |
| C4   | 7028(3)    | 5089(2)    | 4351.9(8)  | 57.2(6)  |
| C5   | 5786(2)    | 4382.6(17) | 4147.6(7)  | 37.4(4)  |
| C6   | 5497.9(18) | 4465.5(15) | 3657.5(6)  | 28.8(3)  |
| C7   | 6896.4(18) | 4329.8(16) | 2842.6(6)  | 28.9(3)  |
| C8   | 7126(2)    | 5216.4(17) | 2399.0(6)  | 33.9(4)  |
| C9   | 6128.0(18) | 6290.3(17) | 2477.8(6)  | 30.1(4)  |
| C10  | 5327.4(17) | 6141.0(15) | 2988.7(6)  | 27.7(3)  |

|      |            |            |            |          |
|------|------------|------------|------------|----------|
| C11  | 5113(2)    | 7321.0(15) | 3289.7(6)  | 31.9(4)  |
| C12  | 5951(2)    | 8368.7(17) | 3215.2(7)  | 38.9(4)  |
| C13  | 5800(3)    | 9395.3(19) | 3522.1(9)  | 53.1(6)  |
| C14  | 4824(3)    | 9399(2)    | 3913.7(9)  | 58.9(6)  |
| C15  | 3998(3)    | 8367(2)    | 3995.6(8)  | 53.3(6)  |
| C16  | 4136(2)    | 7333.8(18) | 3688.7(7)  | 40.7(4)  |
| C17  | 3942.0(18) | 5533.9(16) | 2821.9(6)  | 30.3(4)  |
| C18  | 2721(2)    | 6108.0(18) | 2751.9(7)  | 38.0(4)  |
| C19  | 8153.1(18) | 3559.6(16) | 3018.0(7)  | 31.9(4)  |
| C20  | 7903(2)    | 2545.5(18) | 3327.0(7)  | 38.6(4)  |
| C21  | 9015(2)    | 1852(2)    | 3523.5(8)  | 46.6(5)  |
| C22  | 10407(2)   | 2155(2)    | 3407.8(9)  | 50.3(5)  |
| C23  | 10674(2)   | 3135(2)    | 3096.0(11) | 55.8(6)  |
| C24  | 9558(2)    | 3834(2)    | 2899.1(9)  | 46.2(5)  |
| C25  | 9171(3)    | 6584(2)    | 4203.3(9)  | 53.2(6)  |
| C26  | 8628(4)    | 7528(3)    | 4593.8(11) | 84.1(10) |
| C27  | 9898(3)    | 7327(3)    | 3785.0(10) | 66.1(7)  |
| C28  | 10135(11)  | 5742(6)    | 4500(5)    | 70(2)    |
| C28B | 10552(19)  | 5630(14)   | 4289(9)    | 60(4)    |
| C29  | 4910(3)    | 3561(2)    | 4503.7(7)  | 49.6(5)  |
| C30  | 3695(2)    | 2938(2)    | 4226.6(8)  | 45.8(5)  |
| C31  | 5867(4)    | 2536(3)    | 4711.7(12) | 86.4(11) |
| C32  | 4249(5)    | 4342(3)    | 4932.2(10) | 91.8(13) |

**Table 3 Anisotropic Displacement Parameters ( $\text{\AA}^2 \times 10^3$ ) for *epi-3a*. The Anisotropic displacement factor exponent takes the form:  $-2\pi^2[h^2a^{*2}U_{11}+2hka^*b^*U_{12}+\dots]$ .**

| Atom | $U_{11}$ | $U_{22}$ | $U_{33}$ | $U_{23}$ | $U_{13}$  | $U_{12}$ |
|------|----------|----------|----------|----------|-----------|----------|
| O1   | 79(4)    | 99(3)    | 33.7(14) | 10.6(17) | -22.2(19) | -41(3)   |



**Table 3 Anisotropic Displacement Parameters ( $\text{\AA}^2 \times 10^3$ ) for *epi-3a*. The Anisotropic displacement factor exponent takes the form:  $-2\pi^2[h^2a^{*2}U_{11}+2hka^*b^*U_{12}+\dots]$ .**

| Atom | $U_{11}$ | $U_{22}$ | $U_{33}$ | $U_{23}$ | $U_{13}$  | $U_{12}$  |
|------|----------|----------|----------|----------|-----------|-----------|
| O1B  | 76(7)    | 138(12)  | 44(5)    | 41(6)    | -30(5)    | -62(7)    |
| O2   | 41.2(7)  | 40.4(7)  | 32.9(6)  | 11.1(6)  | 1.2(5)    | -0.4(6)   |
| C1   | 30.5(8)  | 25.2(8)  | 26.5(8)  | 0.4(6)   | -2.8(6)   | -1.8(6)   |
| C2   | 32.3(8)  | 25.1(8)  | 35.1(8)  | -0.2(7)  | -2.0(7)   | -3.3(6)   |
| C3   | 46.1(10) | 31.9(9)  | 41.8(10) | -2.2(8)  | -13.4(8)  | -8.6(8)   |
| C4   | 81.2(16) | 55.8(13) | 34.6(10) | 8.8(9)   | -22.5(11) | -28.4(13) |
| C5   | 51.5(11) | 30.9(9)  | 30.0(9)  | 2.9(7)   | -5.0(8)   | -8.7(8)   |
| C6   | 31.7(8)  | 24.2(8)  | 30.3(8)  | 1.6(6)   | -2.3(7)   | -1.8(6)   |
| C7   | 29.3(8)  | 27.9(8)  | 29.6(8)  | -2.9(7)  | -0.5(6)   | -1.9(7)   |
| C8   | 35.2(9)  | 36.4(9)  | 30.0(8)  | 1.2(7)   | 2.7(7)    | -1.4(8)   |
| C9   | 29.0(8)  | 34.0(9)  | 27.3(8)  | 2.4(7)   | -2.3(6)   | -5.3(7)   |
| C10  | 29.6(8)  | 26.4(8)  | 27.0(8)  | 3.4(6)   | -1.0(6)   | -2.3(7)   |
| C11  | 40.7(9)  | 25.1(8)  | 29.7(8)  | 2.7(7)   | -6.5(7)   | 0.4(7)    |
| C12  | 48.7(10) | 27.6(9)  | 40.4(10) | 5.7(7)   | -9.9(8)   | -4.8(8)   |
| C13  | 77.5(16) | 27.2(9)  | 54.8(12) | 1.1(9)   | -20.2(12) | -5.4(10)  |
| C14  | 92.8(19) | 35.8(11) | 48.0(12) | -12.0(9) | -14.7(13) | 10.4(12)  |
| C15  | 75.6(15) | 46.2(12) | 38.1(10) | -7.2(9)  | 2.9(11)   | 11.2(12)  |
| C16  | 53.0(11) | 35.2(9)  | 34.0(9)  | 0.2(8)   | 2.5(8)    | 2.5(9)    |
| C17  | 32.9(8)  | 29.4(8)  | 28.6(8)  | 2.9(6)   | -1.3(7)   | -4.1(7)   |
| C18  | 33.0(9)  | 38.8(10) | 42.3(10) | 8.1(8)   | -2.6(7)   | -3.8(8)   |
| C19  | 32.3(8)  | 27.0(8)  | 36.2(9)  | -6.1(7)  | -4.1(7)   | -0.4(7)   |
| C20  | 36.7(9)  | 33.6(9)  | 45.3(10) | 1.2(8)   | -2.6(8)   | 0.5(8)    |
| C21  | 49.9(11) | 39.7(10) | 50.4(11) | 4.1(9)   | -8.1(9)   | 6.7(9)    |
| C22  | 41.1(10) | 45.2(12) | 64.7(14) | -6.0(10) | -13.8(10) | 12.1(9)   |
| C23  | 30.4(10) | 49.9(12) | 87.3(17) | 0.7(12)  | -1.4(10)  | 3.3(9)    |
| C24  | 34.3(9)  | 39.3(10) | 65.1(13) | 5.4(10)  | 3.7(9)    | 0.6(9)    |

**Table 3 Anisotropic Displacement Parameters ( $\text{\AA}^2 \times 10^3$ ) for *epi-3a*. The Anisotropic displacement factor exponent takes the form:  $-2\pi^2[h^2a^{*2}U_{11}+2hka^*b^*U_{12}+\dots]$ .**

| Atom | $U_{11}$ | $U_{22}$ | $U_{33}$ | $U_{23}$  | $U_{13}$  | $U_{12}$  |
|------|----------|----------|----------|-----------|-----------|-----------|
| C25  | 58.4(13) | 45.9(12) | 55.2(13) | -2.7(10)  | -23.7(11) | -17.1(10) |
| C26  | 112(2)   | 79.1(19) | 61.0(16) | -25.8(15) | -12.5(16) | -39.7(19) |
| C27  | 49.7(13) | 75.2(17) | 73.5(16) | -6.7(14)  | -11.1(12) | -31.8(13) |
| C28  | 54(3)    | 74(3)    | 82(5)    | -12(3)    | -37(3)    | -4(3)     |
| C28B | 53(5)    | 59(6)    | 67(9)    | 16(6)     | -33(5)    | -17(3)    |
| C29  | 76.2(15) | 45.0(11) | 27.8(9)  | 5.6(8)    | -2.4(9)   | -20.7(11) |
| C30  | 54.5(12) | 43.6(11) | 39.4(10) | 3.3(9)    | 11.2(9)   | -15.3(9)  |
| C31  | 107(2)   | 76.9(19) | 74.8(18) | 49.0(16)  | -40.2(17) | -33.6(19) |
| C32  | 149(3)   | 83(2)    | 42.6(13) | -19.2(13) | 34.8(17)  | -56(2)    |

**Table 4 Bond Lengths for *epi-3a*.**

| Atom | Atom | Length/ $\text{\AA}$ | Atom | Atom | Length/ $\text{\AA}$ |
|------|------|----------------------|------|------|----------------------|
| O1   | C4   | 1.239(4)             | C11  | C16  | 1.398(3)             |
| O1B  | C4   | 1.305(12)            | C12  | C13  | 1.383(3)             |
| O2   | C9   | 1.208(2)             | C13  | C14  | 1.383(4)             |
| C1   | C2   | 1.488(2)             | C14  | C15  | 1.377(4)             |
| C1   | C6   | 1.481(2)             | C15  | C16  | 1.388(3)             |
| C1   | C7   | 1.591(2)             | C17  | C18  | 1.317(3)             |
| C1   | C10  | 1.583(2)             | C19  | C20  | 1.388(3)             |
| C2   | C3   | 1.329(3)             | C19  | C24  | 1.387(3)             |
| C3   | C4   | 1.491(3)             | C20  | C21  | 1.386(3)             |
| C3   | C25  | 1.539(3)             | C21  | C22  | 1.382(3)             |
| C4   | C5   | 1.495(3)             | C22  | C23  | 1.366(4)             |
| C5   | C6   | 1.327(2)             | C23  | C24  | 1.393(3)             |
| C5   | C29  | 1.534(3)             | C25  | C26  | 1.539(4)             |

**Table 4 Bond Lengths for *epi*-3a.**

| Atom | Atom | Length/Å | Atom | Atom | Length/Å  |
|------|------|----------|------|------|-----------|
| C7   | C8   | 1.531(2) | C25  | C27  | 1.528(4)  |
| C7   | C19  | 1.517(2) | C25  | C28  | 1.504(6)  |
| C8   | C9   | 1.507(3) | C25  | C28B | 1.672(17) |
| C9   | C10  | 1.554(2) | C29  | C30  | 1.514(3)  |
| C10  | C11  | 1.518(2) | C29  | C31  | 1.529(4)  |
| C10  | C17  | 1.522(2) | C29  | C32  | 1.544(4)  |
| C11  | C12  | 1.394(3) |      |      |           |

**Table 5 Bond Angles for *epi*-3a.**

| Atom | Atom | Atom | Angle/°    | Atom | Atom | Atom | Angle/°    |
|------|------|------|------------|------|------|------|------------|
| C2   | C1   | C7   | 108.84(13) | C12  | C11  | C10  | 122.37(16) |
| C2   | C1   | C10  | 109.21(13) | C12  | C11  | C16  | 117.95(17) |
| C6   | C1   | C2   | 112.95(14) | C16  | C11  | C10  | 119.40(16) |
| C6   | C1   | C7   | 110.66(13) | C13  | C12  | C11  | 120.8(2)   |
| C6   | C1   | C10  | 111.78(14) | C14  | C13  | C12  | 120.6(2)   |
| C10  | C1   | C7   | 102.90(12) | C15  | C14  | C13  | 119.3(2)   |
| C3   | C2   | C1   | 125.32(16) | C14  | C15  | C16  | 120.6(2)   |
| C2   | C3   | C4   | 118.77(17) | C15  | C16  | C11  | 120.7(2)   |
| C2   | C3   | C25  | 122.16(19) | C18  | C17  | C10  | 125.49(16) |
| C4   | C3   | C25  | 119.06(17) | C20  | C19  | C7   | 118.87(16) |
| O1   | C4   | C3   | 123.6(4)   | C24  | C19  | C7   | 123.51(17) |
| O1   | C4   | C5   | 117.3(4)   | C24  | C19  | C20  | 117.59(17) |
| O1B  | C4   | C3   | 110.6(7)   | C21  | C20  | C19  | 121.42(18) |
| O1B  | C4   | C5   | 124.4(7)   | C22  | C21  | C20  | 120.0(2)   |
| C3   | C4   | C5   | 118.67(16) | C23  | C22  | C21  | 119.5(2)   |
| C4   | C5   | C29  | 119.53(16) | C22  | C23  | C24  | 120.6(2)   |

**Table 5 Bond Angles for *epi*-3a.**

| Atom | Atom | Atom | Angle/°    | Atom | Atom | Atom | Angle/°    |
|------|------|------|------------|------|------|------|------------|
| C6   | C5   | C4   | 118.52(17) | C19  | C24  | C23  | 120.9(2)   |
| C6   | C5   | C29  | 121.94(17) | C3   | C25  | C26  | 109.0(2)   |
| C5   | C6   | C1   | 125.76(16) | C3   | C25  | C28B | 109.2(5)   |
| C8   | C7   | C1   | 103.84(13) | C26  | C25  | C28B | 125.1(8)   |
| C19  | C7   | C1   | 111.58(14) | C27  | C25  | C3   | 111.22(18) |
| C19  | C7   | C8   | 117.98(15) | C27  | C25  | C26  | 106.5(2)   |
| C9   | C8   | C7   | 106.86(14) | C27  | C25  | C28B | 94.5(8)    |
| O2   | C9   | C8   | 125.58(16) | C28  | C25  | C3   | 109.8(3)   |
| O2   | C9   | C10  | 124.50(16) | C28  | C25  | C26  | 104.6(5)   |
| C8   | C9   | C10  | 109.90(14) | C28  | C25  | C27  | 115.3(6)   |
| C9   | C10  | C1   | 102.17(13) | C5   | C29  | C32  | 110.38(18) |
| C11  | C10  | C1   | 111.35(13) | C30  | C29  | C5   | 111.41(16) |
| C11  | C10  | C9   | 115.61(14) | C30  | C29  | C31  | 107.04(19) |
| C11  | C10  | C17  | 113.69(14) | C30  | C29  | C32  | 107.2(2)   |
| C17  | C10  | C1   | 111.26(13) | C31  | C29  | C5   | 109.0(2)   |
| C17  | C10  | C9   | 101.90(13) | C31  | C29  | C32  | 111.7(2)   |

**Table 6 Torsion Angles for *epi*-3a.**

| A   | B  | C   | D   | Angle/°     | A  | B  | C   | D   | Angle/°     |
|-----|----|-----|-----|-------------|----|----|-----|-----|-------------|
| O1  | C4 | C5  | C6  | 171.9(6)    | C6 | C5 | C29 | C31 | 115.7(2)    |
| O1  | C4 | C5  | C29 | -9.7(7)     | C6 | C5 | C29 | C32 | -121.3(3)   |
| O1B | C4 | C5  | C6  | -149.9(19)  | C7 | C1 | C2  | C3  | -122.7(2)   |
| O1B | C4 | C5  | C29 | 28.5(19)    | C7 | C1 | C6  | C5  | 121.59(19)  |
| O2  | C9 | C10 | C1  | -161.85(16) | C7 | C1 | C10 | C9  | -34.26(15)  |
| O2  | C9 | C10 | C11 | -40.8(2)    | C7 | C1 | C10 | C11 | -158.25(13) |
| O2  | C9 | C10 | C17 | 83.0(2)     | C7 | C1 | C10 | C17 | 73.81(16)   |

**Table 6 Torsion Angles for *epi-3a*.**

| <b>A</b> | <b>B</b> | <b>C</b> | <b>D</b> | <b>Angle/°</b> | <b>A</b> | <b>B</b> | <b>C</b> | <b>D</b> | <b>Angle/°</b> |
|----------|----------|----------|----------|----------------|----------|----------|----------|----------|----------------|
| C1       | C2       | C3       | C4       | -0.6(3)        | C7       | C8       | C9       | O2       | -174.79(17)    |
| C1       | C2       | C3       | C25      | -179.58(18)    | C7       | C8       | C9       | C10      | 3.70(18)       |
| C1       | C7       | C8       | C9       | -25.53(17)     | C7       | C19      | C20      | C21      | -176.10(18)    |
| C1       | C7       | C19      | C20      | 75.77(19)      | C7       | C19      | C24      | C23      | 176.1(2)       |
| C1       | C7       | C19      | C24      | -102.2(2)      | C8       | C7       | C19      | C20      | -164.14(16)    |
| C1       | C10      | C11      | C12      | 95.11(19)      | C8       | C7       | C19      | C24      | 17.9(3)        |
| C1       | C10      | C11      | C16      | -78.68(19)     | C8       | C9       | C10      | C1       | 19.64(17)      |
| C1       | C10      | C17      | C18      | 152.37(17)     | C8       | C9       | C10      | C11      | 140.72(15)     |
| C2       | C1       | C6       | C5       | -0.7(3)        | C8       | C9       | C10      | C17      | -95.48(15)     |
| C2       | C1       | C7       | C8       | -78.39(16)     | C9       | C10      | C11      | C12      | -20.9(2)       |
| C2       | C1       | C7       | C19      | 49.71(18)      | C9       | C10      | C11      | C16      | 165.32(15)     |
| C2       | C1       | C10      | C9       | 81.24(16)      | C9       | C10      | C17      | C18      | -99.4(2)       |
| C2       | C1       | C10      | C11      | -42.74(18)     | C10      | C1       | C2       | C3       | 125.70(19)     |
| C2       | C1       | C10      | C17      | -170.68(14)    | C10      | C1       | C6       | C5       | -124.36(19)    |
| C2       | C3       | C4       | O1       | -171.5(7)      | C10      | C1       | C7       | C8       | 37.39(16)      |
| C2       | C3       | C4       | O1B      | 153.8(17)      | C10      | C1       | C7       | C19      | 165.49(13)     |
| C2       | C3       | C4       | C5       | 0.6(3)         | C10      | C11      | C12      | C13      | -174.99(17)    |
| C2       | C3       | C25      | C26      | 117.8(3)       | C10      | C11      | C16      | C15      | 174.92(19)     |
| C2       | C3       | C25      | C27      | 0.6(3)         | C11      | C10      | C17      | C18      | 25.7(2)        |
| C2       | C3       | C25      | C28      | -128.2(6)      | C11      | C12      | C13      | C14      | 0.8(3)         |
| C2       | C3       | C25      | C28B     | -102.3(9)      | C12      | C11      | C16      | C15      | 0.9(3)         |
| C3       | C4       | C5       | C6       | -0.6(3)        | C12      | C13      | C14      | C15      | -0.1(4)        |
| C3       | C4       | C5       | C29      | 177.8(2)       | C13      | C14      | C15      | C16      | -0.2(4)        |
| C4       | C3       | C25      | C26      | -61.2(3)       | C14      | C15      | C16      | C11      | -0.2(3)        |
| C4       | C3       | C25      | C27      | -178.3(2)      | C16      | C11      | C12      | C13      | -1.1(3)        |
| C4       | C3       | C25      | C28      | 52.9(7)        | C17      | C10      | C11      | C12      | -138.28(17)    |

**Table 6 Torsion Angles for *epi*-3a.**

| A  | B  | C   | D    | Angle/°     | A   | B   | C   | D   | Angle/°     |
|----|----|-----|------|-------------|-----|-----|-----|-----|-------------|
| C4 | C3 | C25 | C28B | 78.7(10)    | C17 | C10 | C11 | C16 | 47.9(2)     |
| C4 | C5 | C6  | C1   | 0.7(3)      | C19 | C7  | C8  | C9  | -149.57(15) |
| C4 | C5 | C29 | C30  | 179.4(2)    | C19 | C20 | C21 | C22 | -0.8(3)     |
| C4 | C5 | C29 | C31  | -62.7(3)    | C20 | C19 | C24 | C23 | -1.8(3)     |
| C4 | C5 | C29 | C32  | 60.3(3)     | C20 | C21 | C22 | C23 | -0.5(4)     |
| C6 | C1 | C2  | C3   | 0.6(3)      | C21 | C22 | C23 | C24 | 0.7(4)      |
| C6 | C1 | C7  | C8   | 156.94(14)  | C22 | C23 | C24 | C19 | 0.6(4)      |
| C6 | C1 | C7  | C19  | -74.96(17)  | C24 | C19 | C20 | C21 | 2.0(3)      |
| C6 | C1 | C10 | C9   | -153.03(13) | C25 | C3  | C4  | O1  | 7.5(7)      |
| C6 | C1 | C10 | C11  | 82.98(17)   | C25 | C3  | C4  | O1B | -27.2(17)   |
| C6 | C1 | C10 | C17  | -44.95(18)  | C25 | C3  | C4  | C5  | 179.6(2)    |
| C6 | C5 | C29 | C30  | -2.3(3)     | C29 | C5  | C6  | C1  | -177.63(18) |

**Table 7 Hydrogen Atom Coordinates ( $\text{\AA} \times 10^4$ ) and Isotropic Displacement Parameters ( $\text{\AA}^2 \times 10^3$ ) for *epi*-3a.**

| Atom | x       | y        | z       | U(eq) |
|------|---------|----------|---------|-------|
| H2   | 8084.1  | 6359.29  | 3295.71 | 37    |
| H6   | 4714.33 | 4026.3   | 3539.04 | 35    |
| H7   | 6129.04 | 3760.37  | 2748.53 | 35    |
| H8A  | 8106.15 | 5500.41  | 2391.58 | 41    |
| H8B  | 6918.05 | 4805.8   | 2081.37 | 41    |
| H12  | 6620.7  | 8377.38  | 2955.91 | 47    |
| H13  | 6360.78 | 10089.71 | 3464.46 | 64    |
| H14  | 4726.53 | 10090.52 | 4119.47 | 71    |
| H15  | 3340.83 | 8362.55  | 4258.88 | 64    |
| H16  | 3573.61 | 6642.3   | 3749.33 | 49    |

**Table 7 Hydrogen Atom Coordinates ( $\text{\AA}\times 10^4$ ) and Isotropic Displacement Parameters ( $\text{\AA}^2\times 10^3$ ) for *epi-3a*.**

| Atom | x        | y       | z       | U(eq) |
|------|----------|---------|---------|-------|
| H17  | 3959.42  | 4686.25 | 2764.74 | 36    |
| H18A | 2657.67  | 6955.58 | 2804.93 | 46    |
| H18B | 1922.08  | 5665.82 | 2649.33 | 46    |
| H20  | 6969.44  | 2326.8  | 3403.94 | 46    |
| H21  | 8823.21  | 1182.23 | 3733.16 | 56    |
| H22  | 11155.7  | 1696.81 | 3541.15 | 60    |
| H23  | 11609.51 | 3336.69 | 3014.42 | 67    |
| H24  | 9756.97  | 4493.31 | 2685.02 | 55    |
| H26A | 8035.72  | 8126.48 | 4427.89 | 126   |
| H26B | 9424.2   | 7936.87 | 4748.19 | 126   |
| H26C | 8084.51  | 7107.64 | 4848.96 | 126   |
| H27A | 10236.03 | 6774.76 | 3527.49 | 99    |
| H27B | 10686.86 | 7777    | 3924.48 | 99    |
| H27C | 9227.3   | 7895.76 | 3640.34 | 99    |
| H28A | 9628.61  | 5420.28 | 4786.4  | 105   |
| H28B | 10952.28 | 6196.39 | 4613.72 | 105   |
| H28C | 10438.87 | 5070.95 | 4288.03 | 105   |
| H28D | 10308.45 | 5021.09 | 4538.89 | 89    |
| H28E | 11362.43 | 6094.28 | 4402.67 | 89    |
| H28F | 10776.04 | 5226.75 | 3975.93 | 89    |
| H30A | 3038.88  | 3552.41 | 4107.53 | 69    |
| H30B | 3211.96  | 2383.71 | 4452.32 | 69    |
| H30C | 4065.16  | 2481.63 | 3944.18 | 69    |
| H31A | 6227.49  | 2048.43 | 4436.75 | 130   |
| H31B | 5324.96  | 2019.02 | 4935.51 | 130   |
| H31C | 6648.12  | 2896.95 | 4893.48 | 130   |

**Table 7 Hydrogen Atom Coordinates ( $\text{\AA} \times 10^4$ ) and Isotropic Displacement Parameters ( $\text{\AA}^2 \times 10^3$ ) for *epi-3a*.**

| Atom | x       | y       | z       | U(eq) |
|------|---------|---------|---------|-------|
| H32A | 4994.56 | 4718.29 | 5127.14 | 138   |
| H32B | 3685.93 | 3819.6  | 5147.21 | 138   |
| H32C | 3654.75 | 4973.13 | 4788.82 | 138   |

**Table 8 Atomic Occupancy for *epi-3a*.**

| Atom | Occupancy | Atom | Occupancy | Atom | Occupancy |
|------|-----------|------|-----------|------|-----------|
| O1   | 0.69(3)   | O1B  | 0.31(3)   | C28  | 0.69(3)   |
| H28A | 0.69(3)   | H28B | 0.69(3)   | H28C | 0.69(3)   |
| C28B | 0.31(3)   | H28D | 0.31(3)   | H28E | 0.31(3)   |
| H28F | 0.31(3)   |      |           |      |           |

#### Crystal structure determination of *epi-3a*

**Crystal Data** for  $\text{C}_{32}\text{H}_{36}\text{O}_2$  ( $M = 452.61$  g/mol): orthorhombic, space group  $P2_12_12_1$  (no. 19),  $a = 9.38580(10)$   $\text{\AA}$ ,  $b = 10.82370(10)$   $\text{\AA}$ ,  $c = 26.4399(3)$   $\text{\AA}$ ,  $V = 2686.01(5)$   $\text{\AA}^3$ ,  $Z = 4$ ,  $T = 149.99(10)$  K,  $\mu(\text{Cu K}\alpha) = 0.522$   $\text{mm}^{-1}$ ,  $D_{\text{calc}} = 1.119$   $\text{g/cm}^3$ , 15182 reflections measured ( $6.686^\circ \leq 2\theta \leq 143.474^\circ$ ), 5140 unique ( $R_{\text{int}} = 0.0198$ ,  $R_{\text{sigma}} = 0.0200$ ) which were used in all calculations. The final  $R_1$  was 0.0361 ( $I > 2\sigma(I)$ ) and  $wR_2$  was 0.0944 (all data).

## 10. References

- (1) Chu, W.-D.; Zhang, L.-F.; Bao, X.; Zhao, X.-H.; Zeng, C.; Du, J.-Y.; Zhang, G.-B.; Wang, F.-X.; Ma, X.-Y.; Fan, C.-A. *Angew. Chem., Int. Ed.* **2013**, *52*, 9229.
- (2) Yan, B.; Zuo, L.; Chang, X.; Liu, T.; Cui, M.; Liu, Y.; Sun, H.; Chen, W.; Guo, W. *Org. Lett.* **2021**, *23*, 351.

## 11. NMR Spectra



sunhy-134-  
 7.92 7.88 7.87 7.86 7.48 7.46 7.46 7.44 7.42 7.39 7.38 7.37 7.37 7.36 7.36 7.35 7.28 7.25 7.24 7.23 7.22 7.21 7.20 7.19 7.18 7.17  
 2.84 2.83 2.81 2.80 2.79 2.78 2.76 2.75 1.78 1.76 1.60 1.51 0.89 0.87

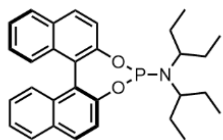

<sup>1</sup>H NMR (400M, CDCl<sub>3</sub>)

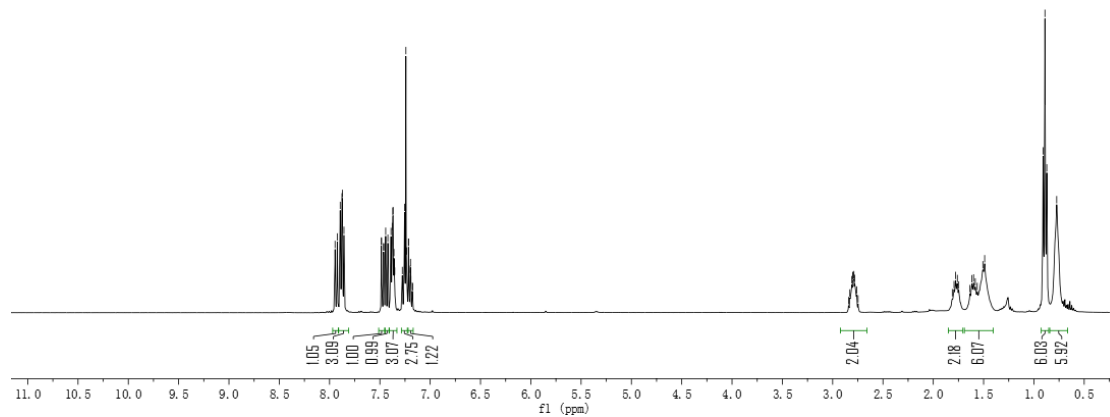

sunhy-134-1

150.54 150.46 150.11 132.95 132.89 131.40 130.41 130.26 129.54 128.89 128.21 127.24 125.99 125.87 124.68 124.33 124.16 122.55 122.53 122.41 121.98 121.84 121.84 57.74 29.47 11.90 11.78

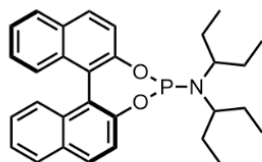

<sup>13</sup>C NMR (100M, CDCl<sub>3</sub>)

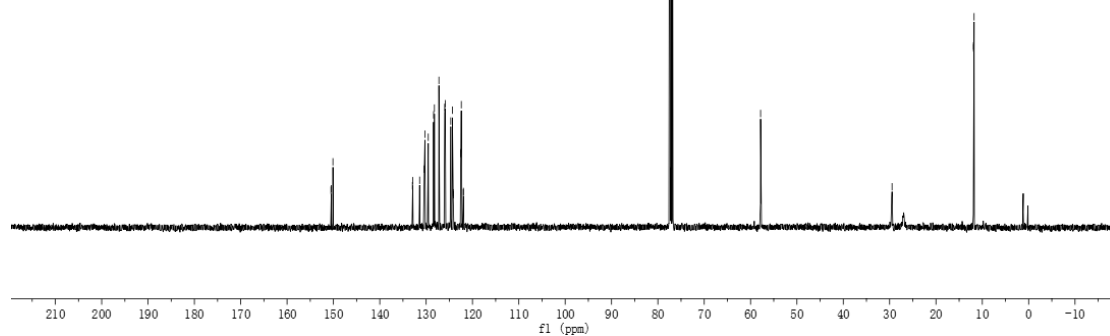

sunhy-134-1

-148.53

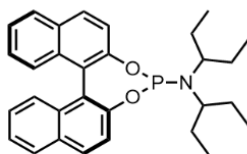

$^{31}\text{P}$  NMR (162M,  $\text{CDCl}_3$ )

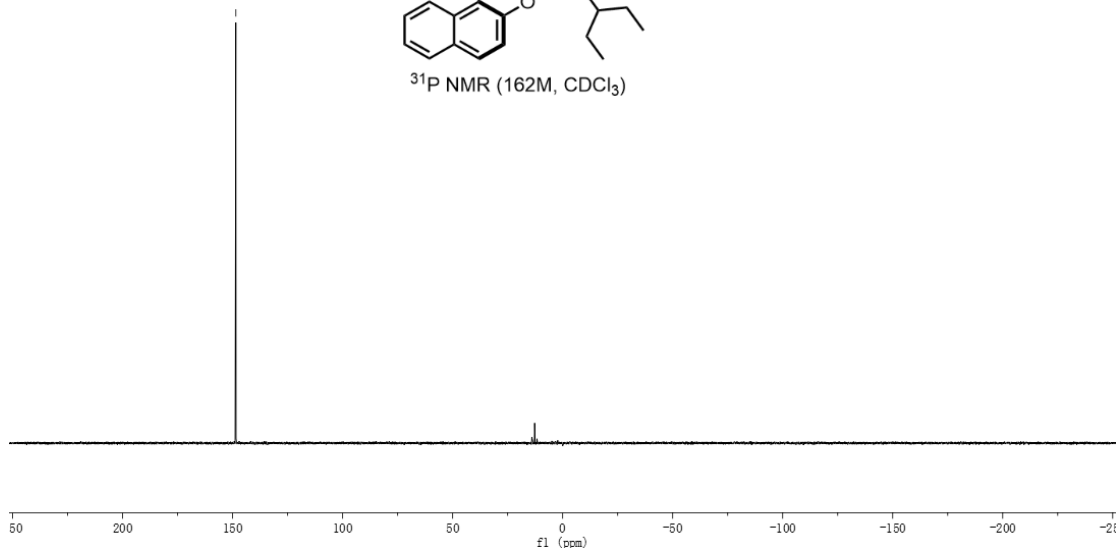

7.986  
7.984  
7.982  
7.889  
7.885  
7.883  
7.776  
7.774  
7.554  
7.553  
7.552  
7.440  
7.440  
7.398  
7.398  
7.387  
7.387  
7.386  
7.380  
7.228  
7.226  
7.223  
7.223  
7.223  
7.221  
7.221  
7.220  
7.215  
7.183  
-4.04  
-4.02  
-2.88  
-2.88  
-2.88  
-2.87  
-2.87  
-2.86  
-2.14  
-2.13  
-2.11  
-2.09  
-1.43  
-1.43  
-1.41  
-1.39  
-1.37  
-1.35  
-1.11  
-1.10  
-1.08  
-0.92  
-0.90  
-0.88  
-0.88  
-0.86  
-0.84  
-0.72  
-0.70  
-0.68

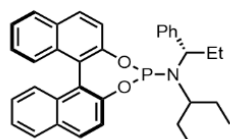

$^1\text{H}$  NMR (400M,  $\text{CDCl}_3$ )

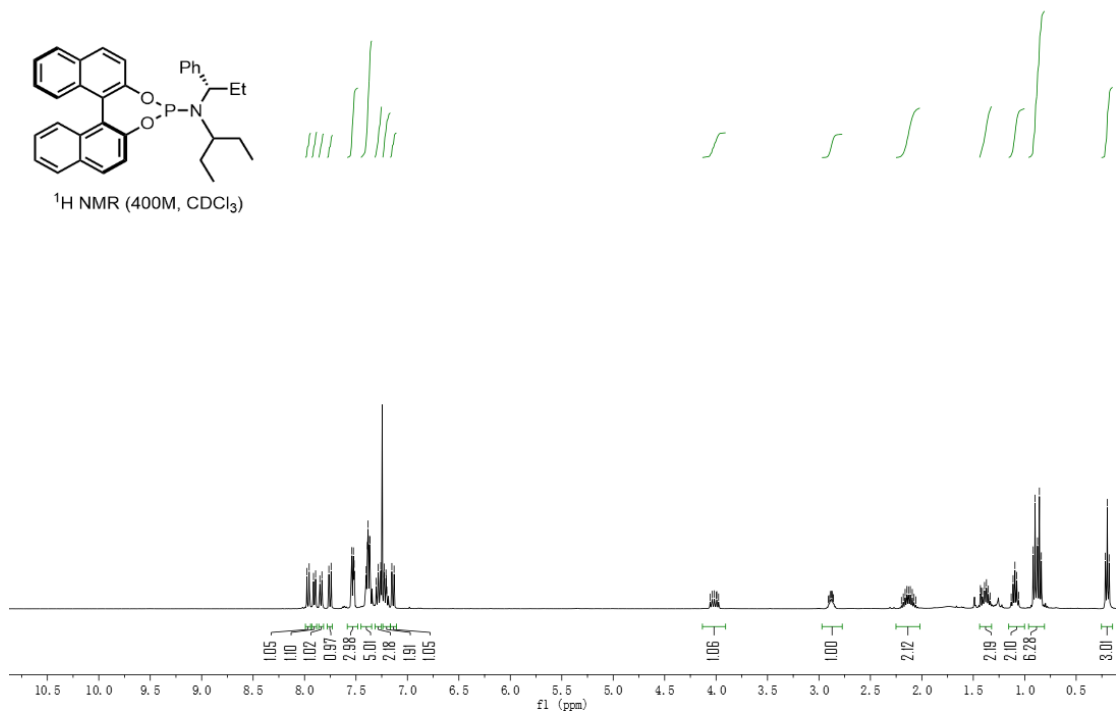

sunhy-146-1

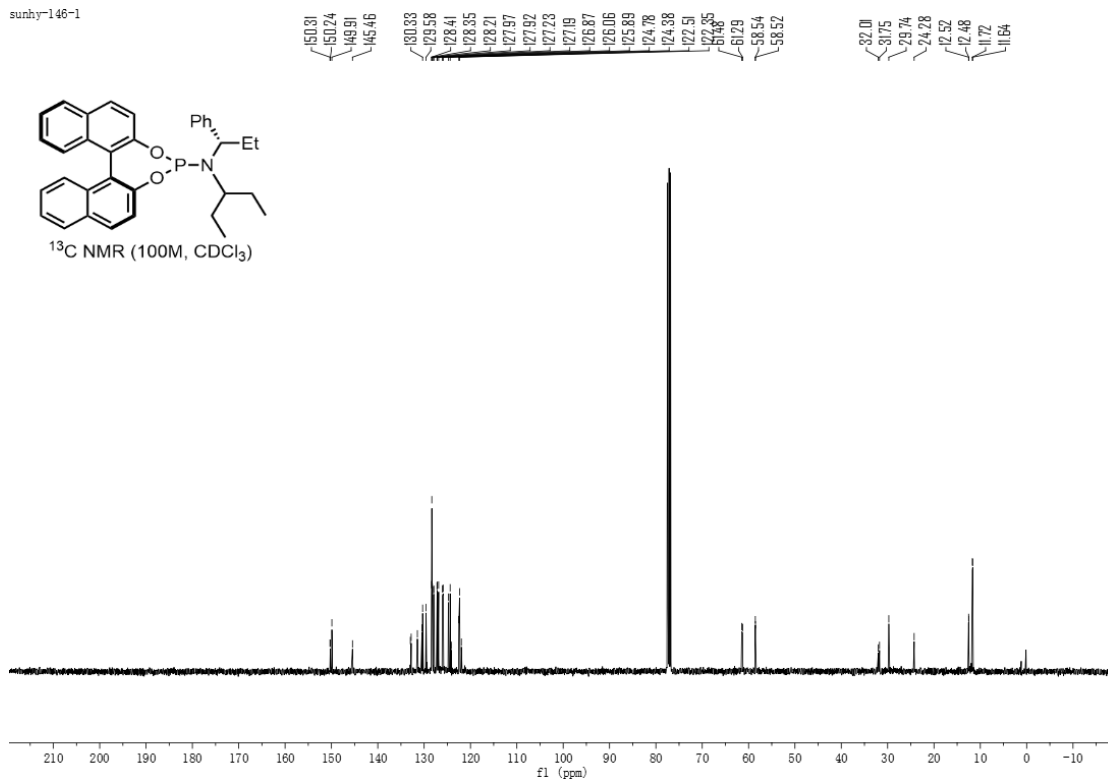

sunhy-146-1

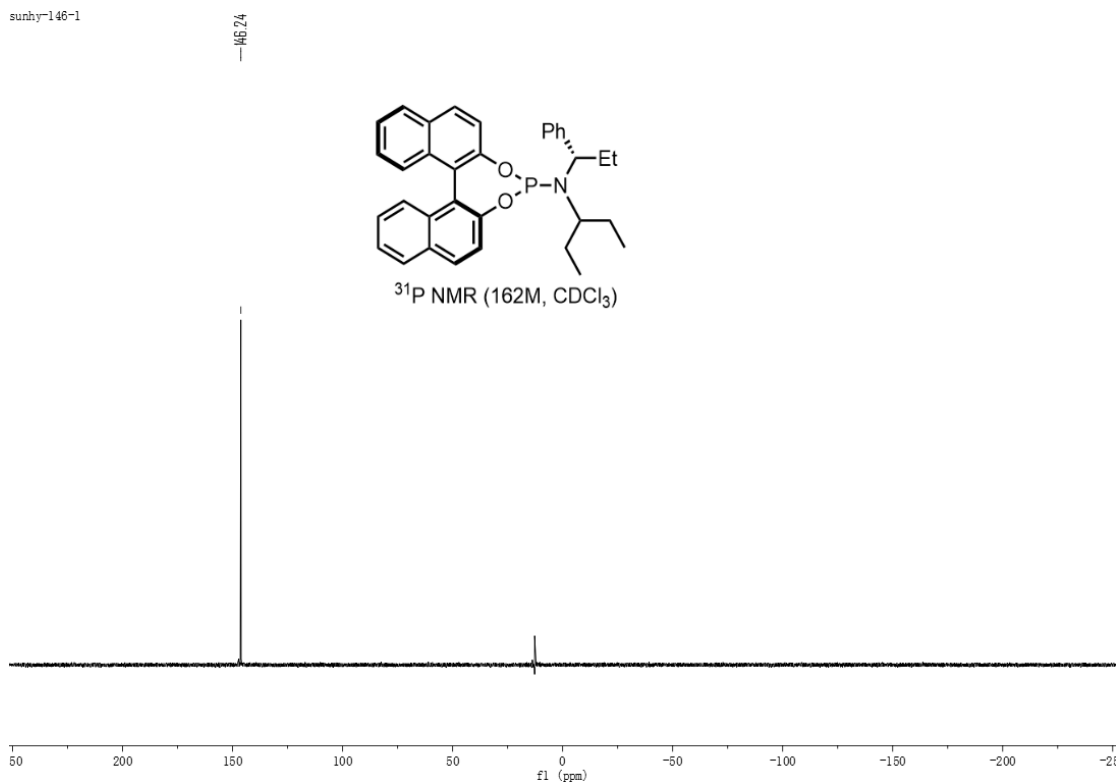

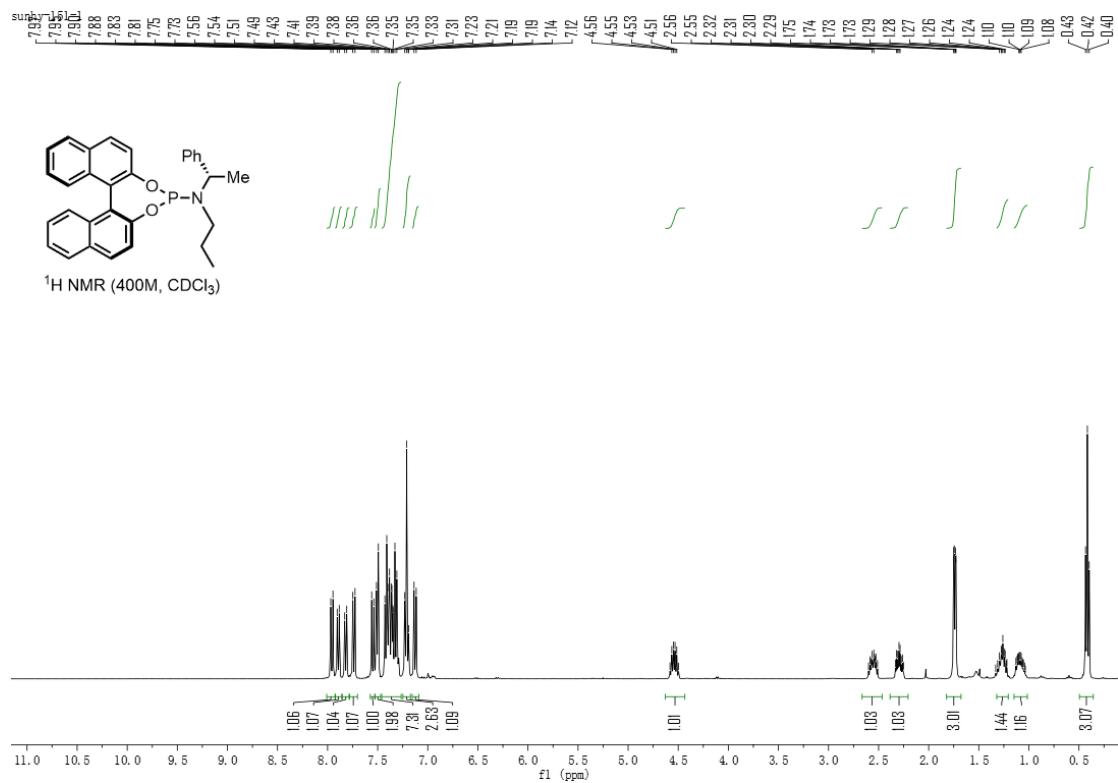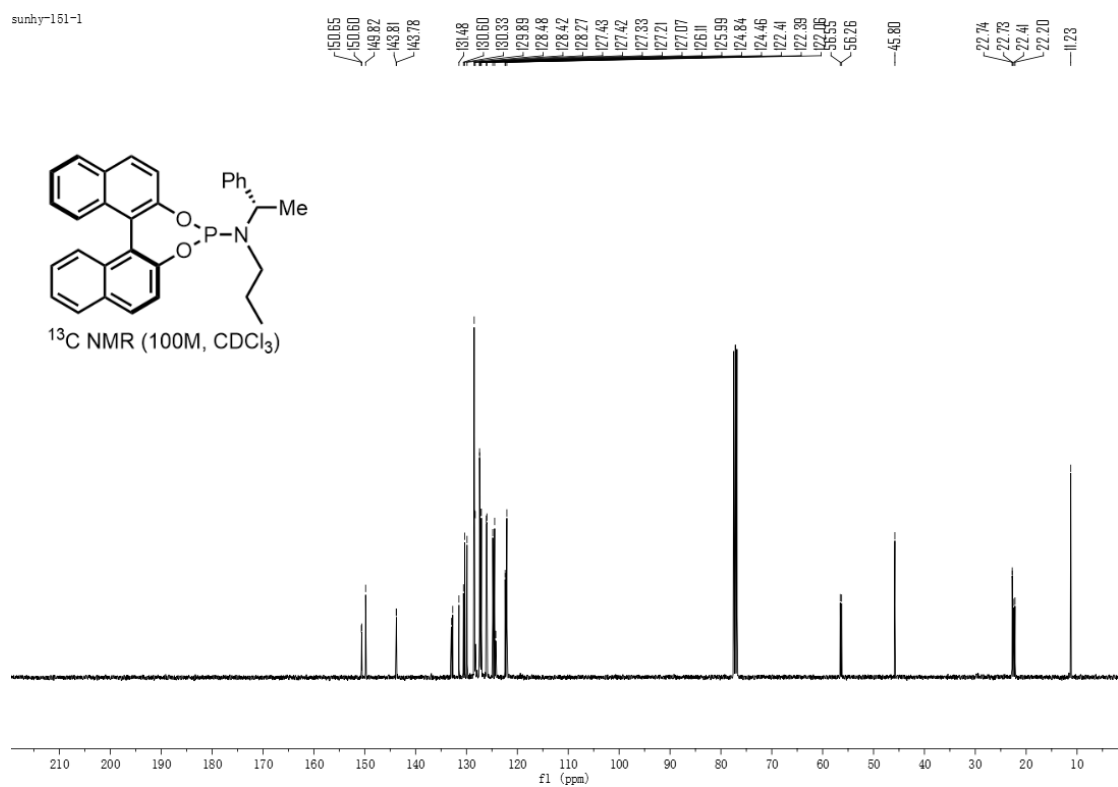

sunhy-151-1

147.86

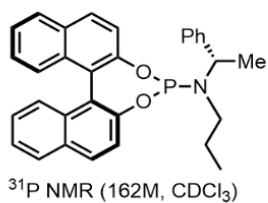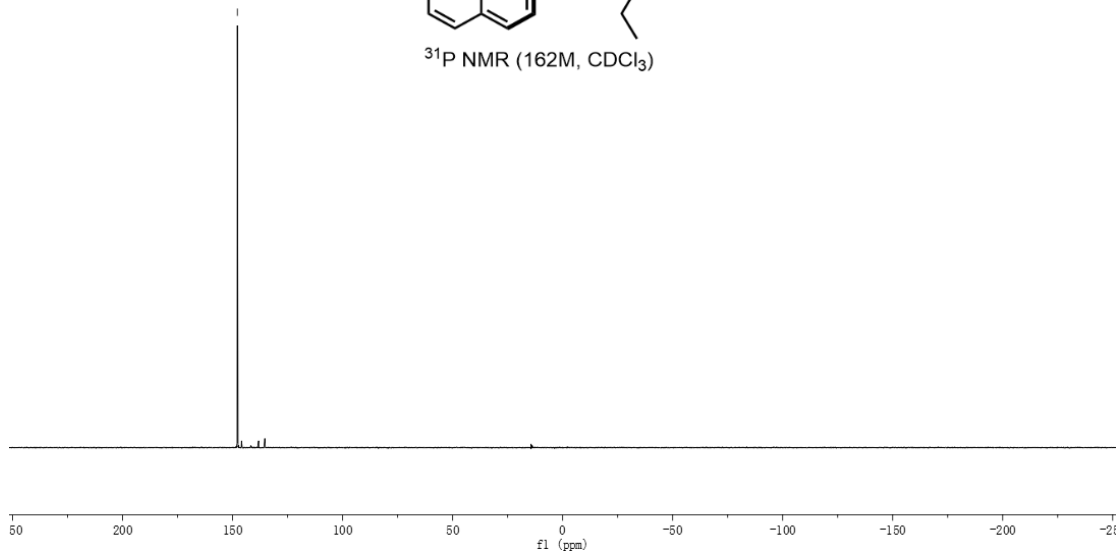

7.986  
7.967  
7.927  
7.885  
7.884  
7.786  
7.760  
7.558  
7.555  
7.533  
7.442  
7.440  
7.388  
7.385  
7.333  
7.301  
7.300  
7.228  
7.226  
7.224  
7.223  
7.222  
7.220  
7.200  
4.12  
4.10  
4.10  
4.10  
4.08  
4.06  
4.05  
4.04  
3.48  
3.42  
3.41  
3.41  
3.40  
3.39  
2.25  
2.24  
2.24  
2.24  
2.23  
2.22  
2.22  
1.98  
1.96  
1.95  
1.09  
1.07  
1.06  
0.98  
0.96  
0.65  
0.63

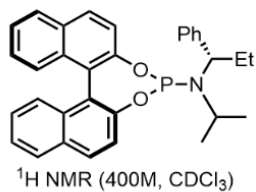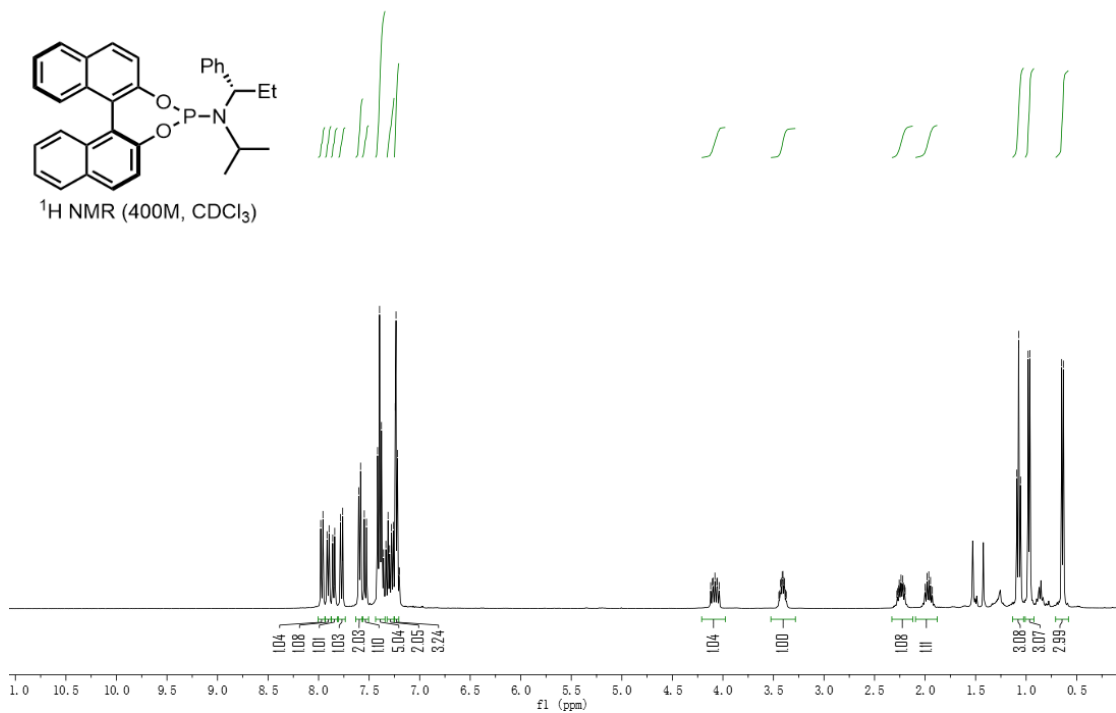

sunhy-157-1

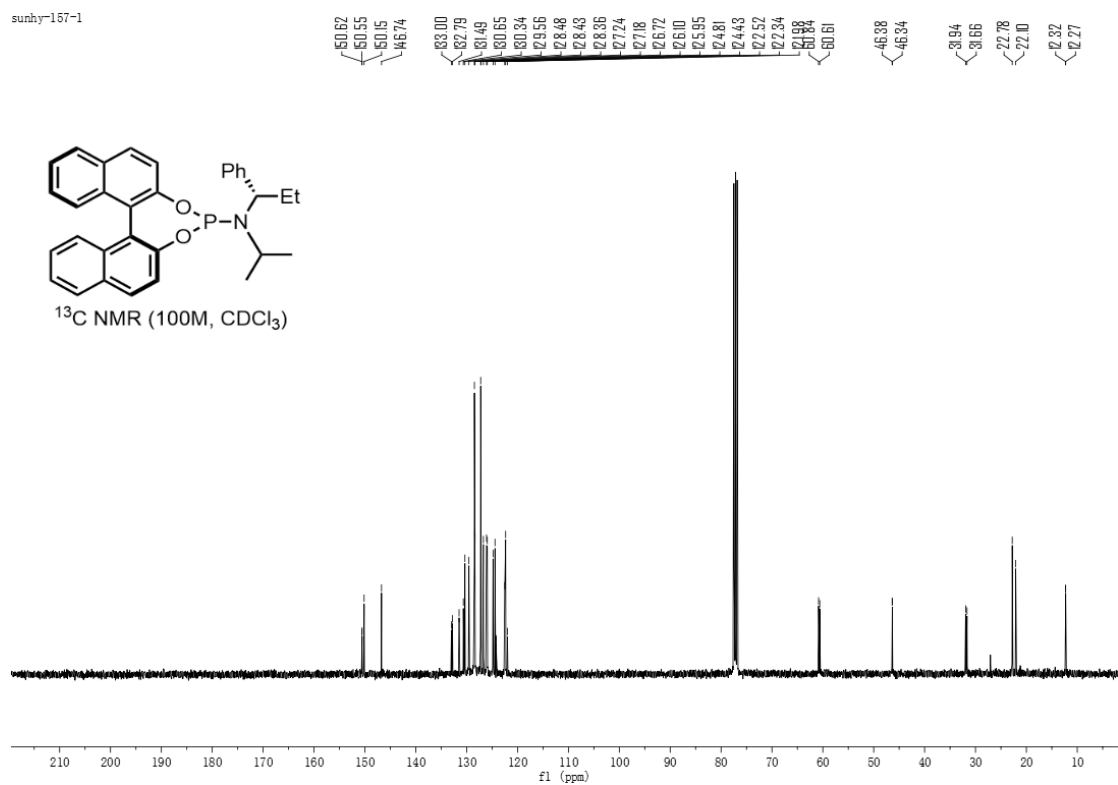

sunhy-157-1

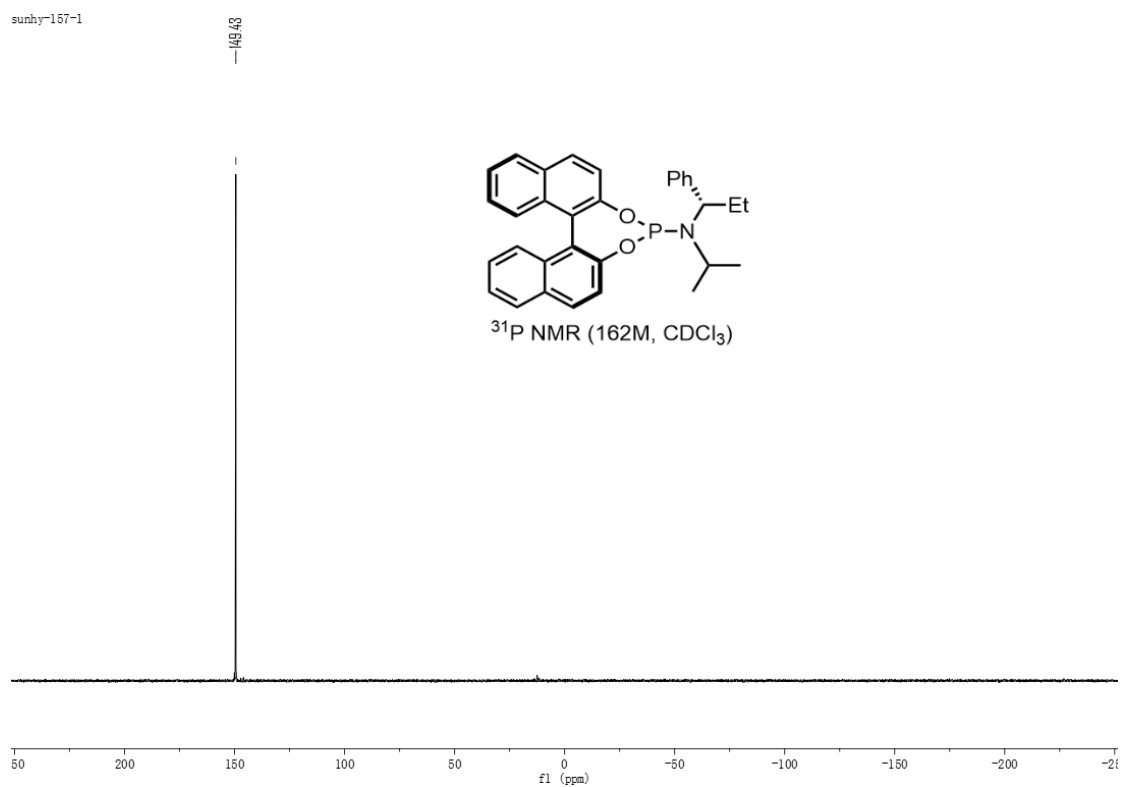

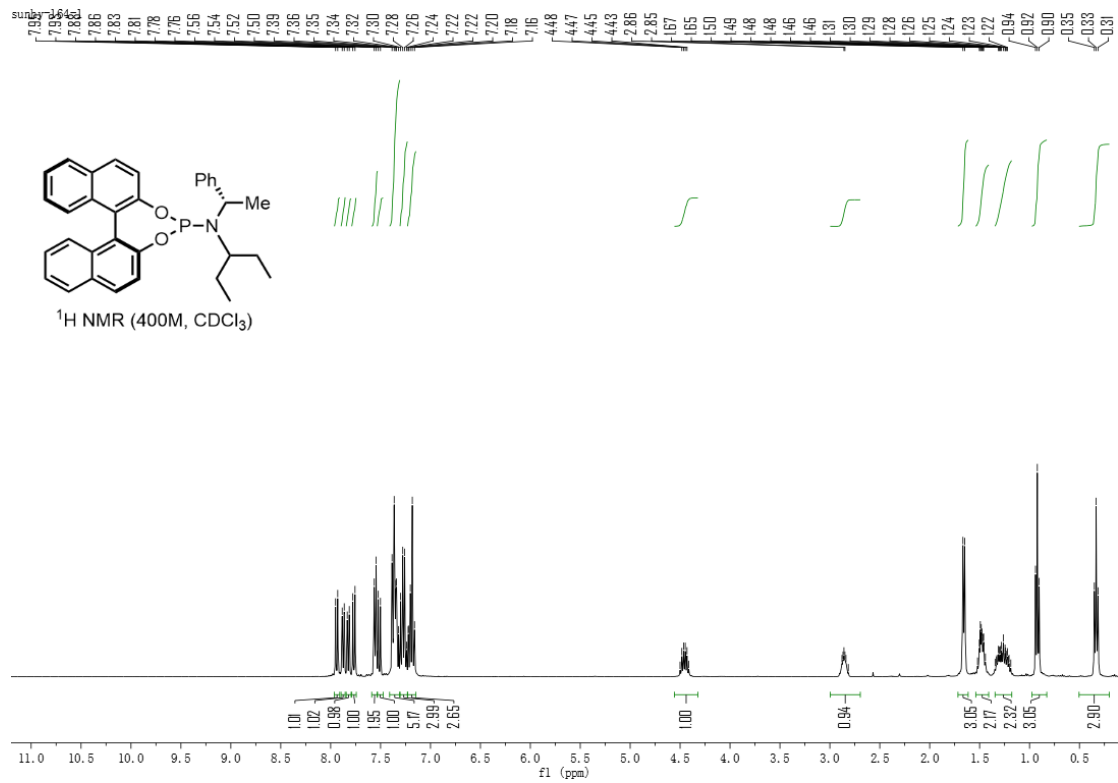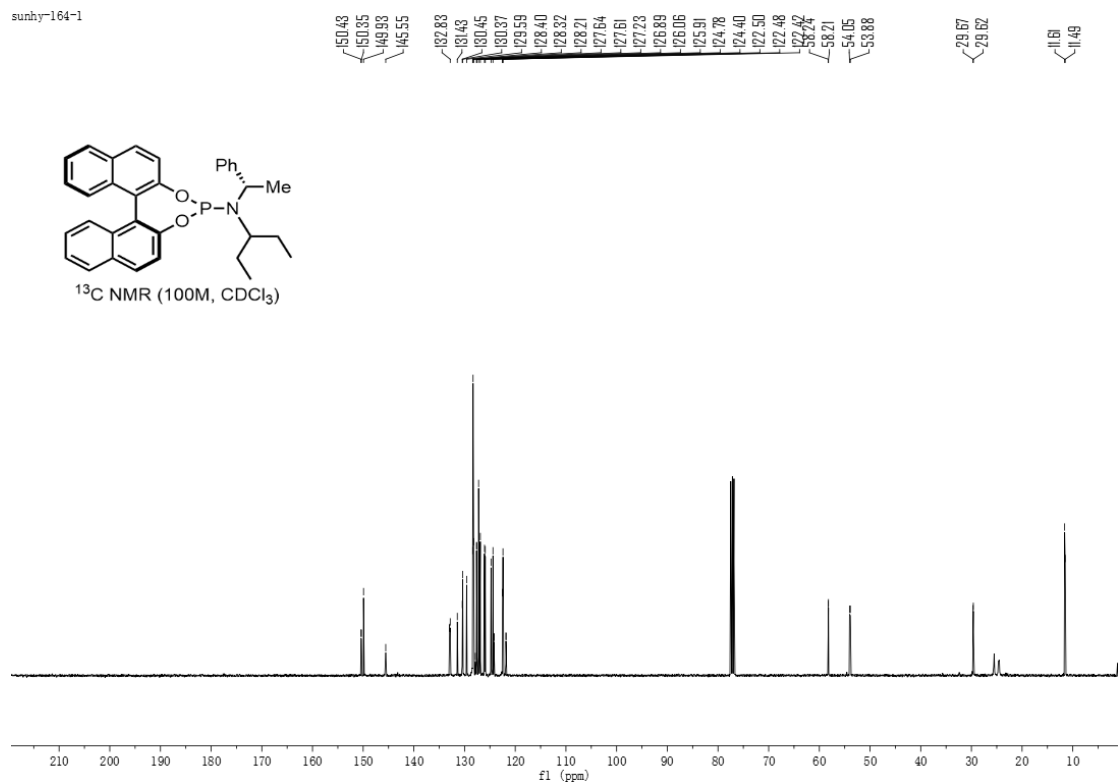

sunhy-164-1

147.60

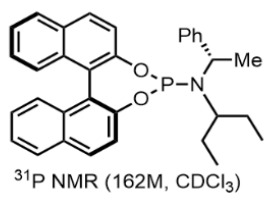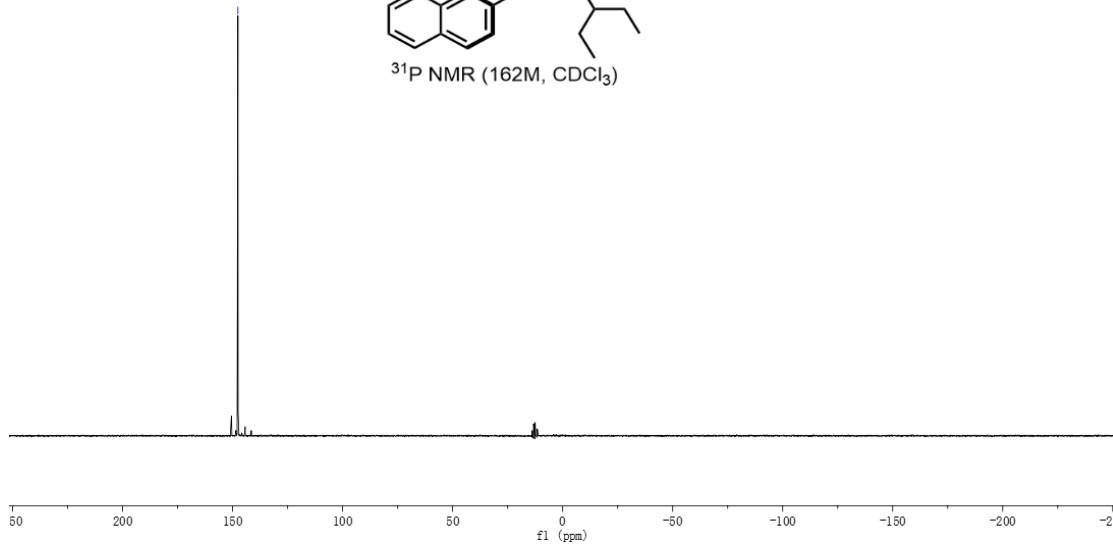

sunhy-164-1

147.60

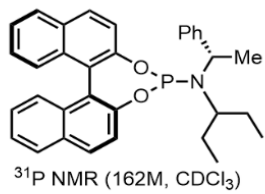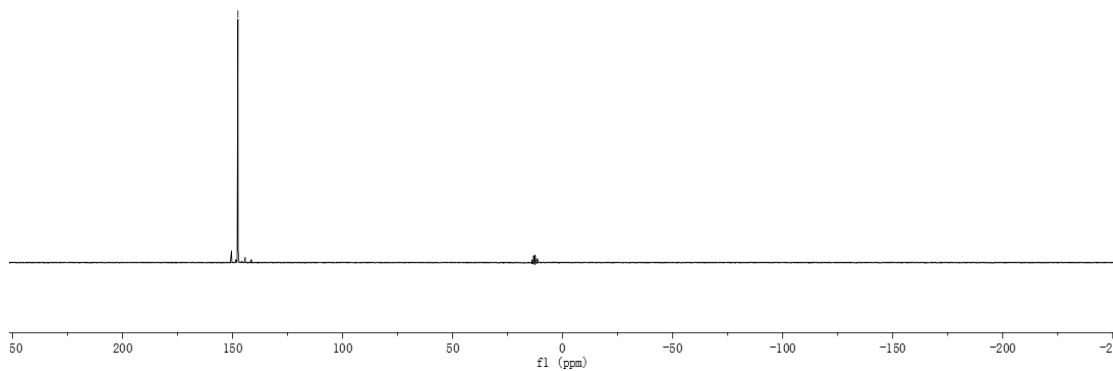



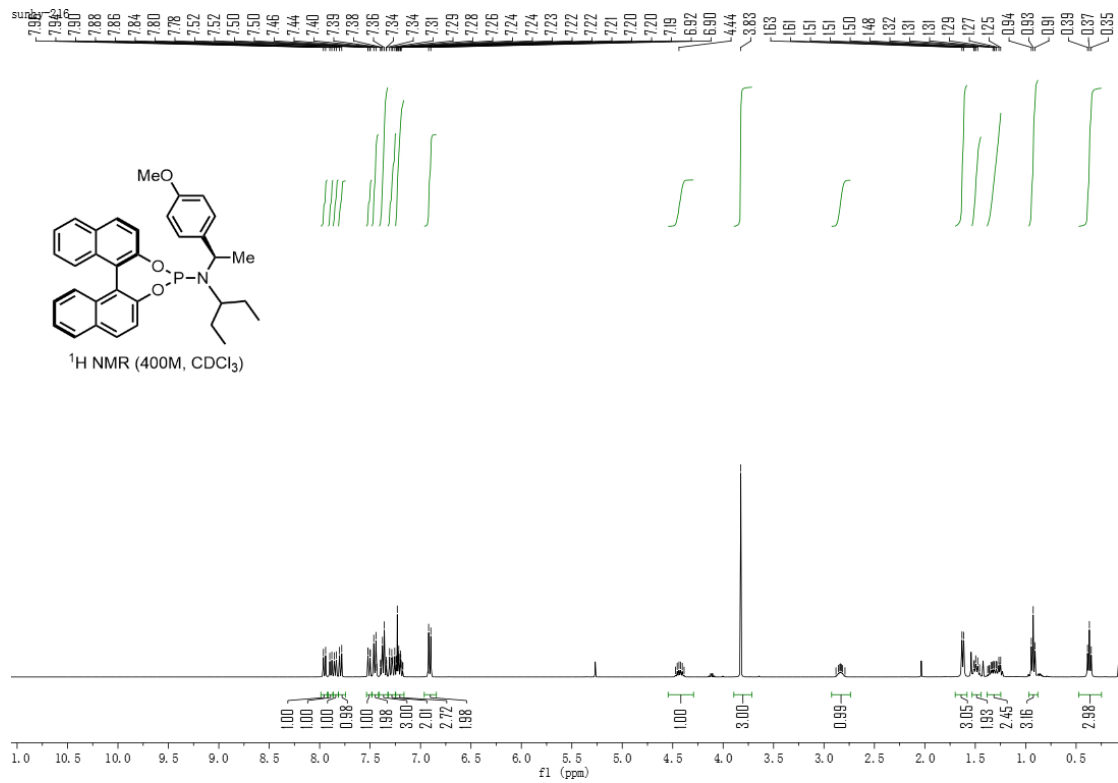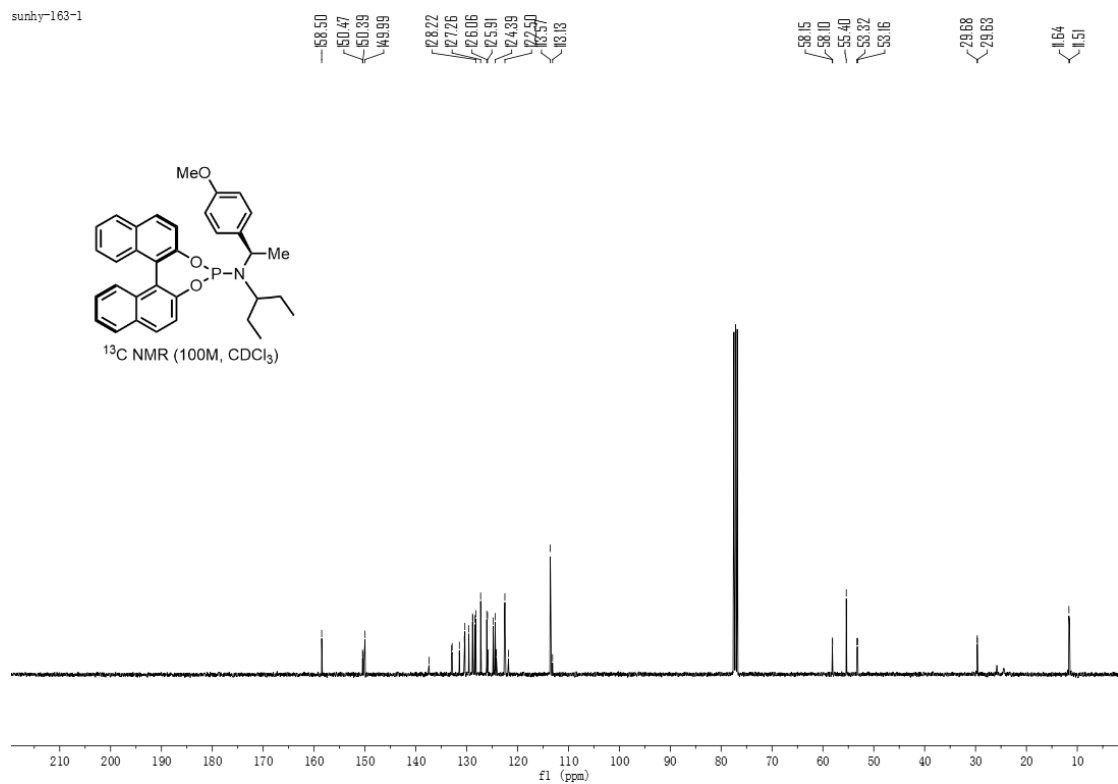

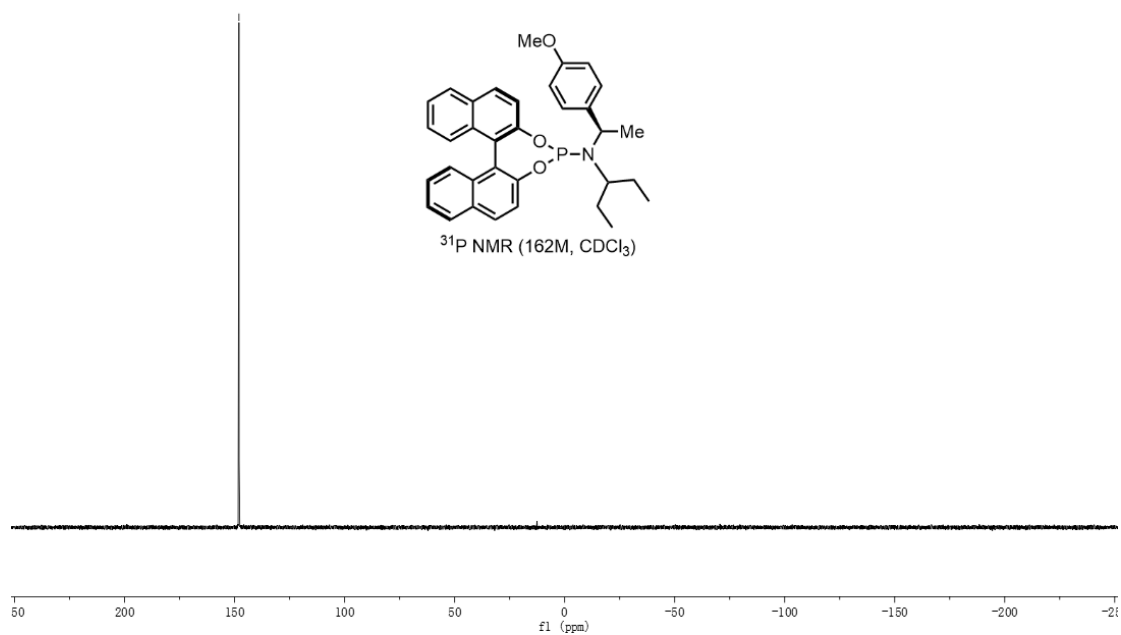

7.95  
7.93  
7.92  
7.88  
7.86  
7.80  
7.78  
7.68  
7.66  
7.53  
7.51  
7.45  
7.43  
7.38  
7.36  
7.34  
7.33  
7.31  
7.29  
7.27  
7.25  
7.22  
7.21  
7.19  
7.18  
7.17  
6.93  
6.91  
4.43  
4.41  
4.41  
4.39  
3.81  
3.29  
3.26  
1.65  
1.80  
1.77  
1.75  
1.68  
1.66  
1.64  
1.62  
1.61  
1.60  
1.57  
1.56  
1.53  
1.52  
1.28  
1.26  
1.24  
1.14  
1.12

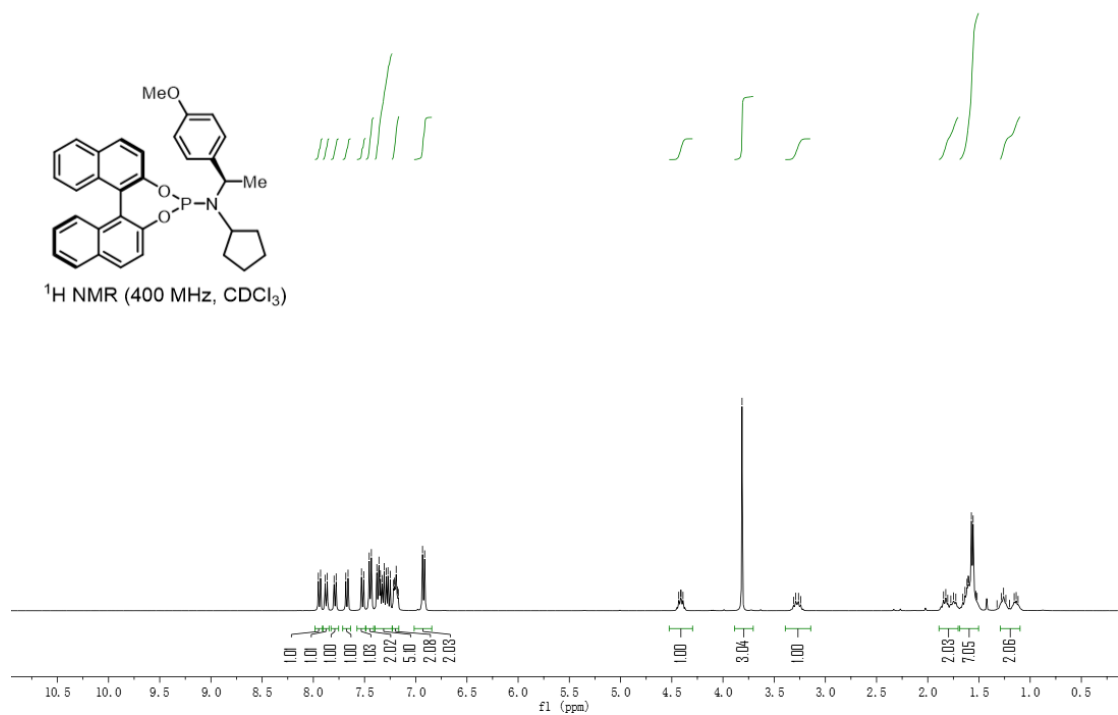

sunhy-302-6-1

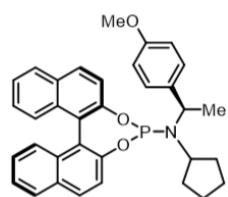

$^{13}\text{C}$  NMR (100 MHz,  $\text{CDCl}_3$ )

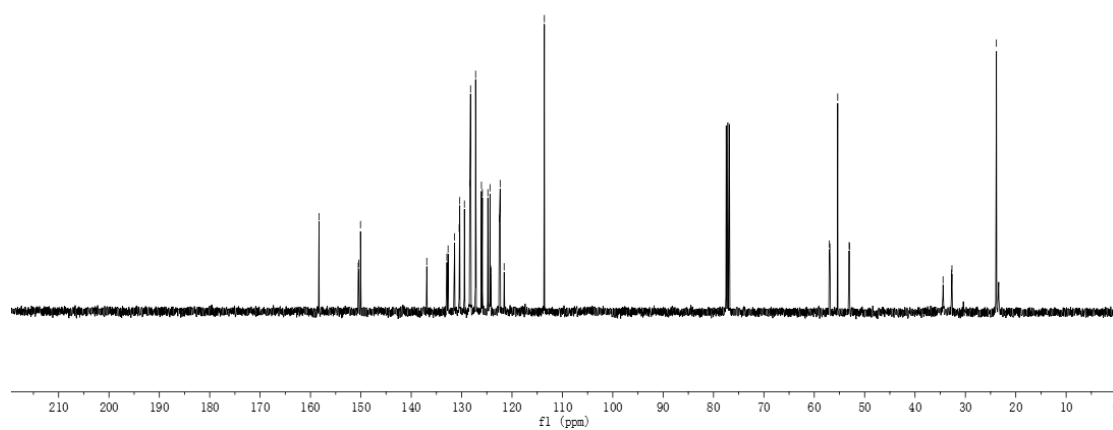

sunhy-302-6-1

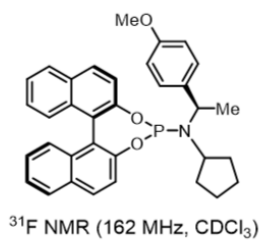

$^{31}\text{F}$  NMR (162 MHz,  $\text{CDCl}_3$ )

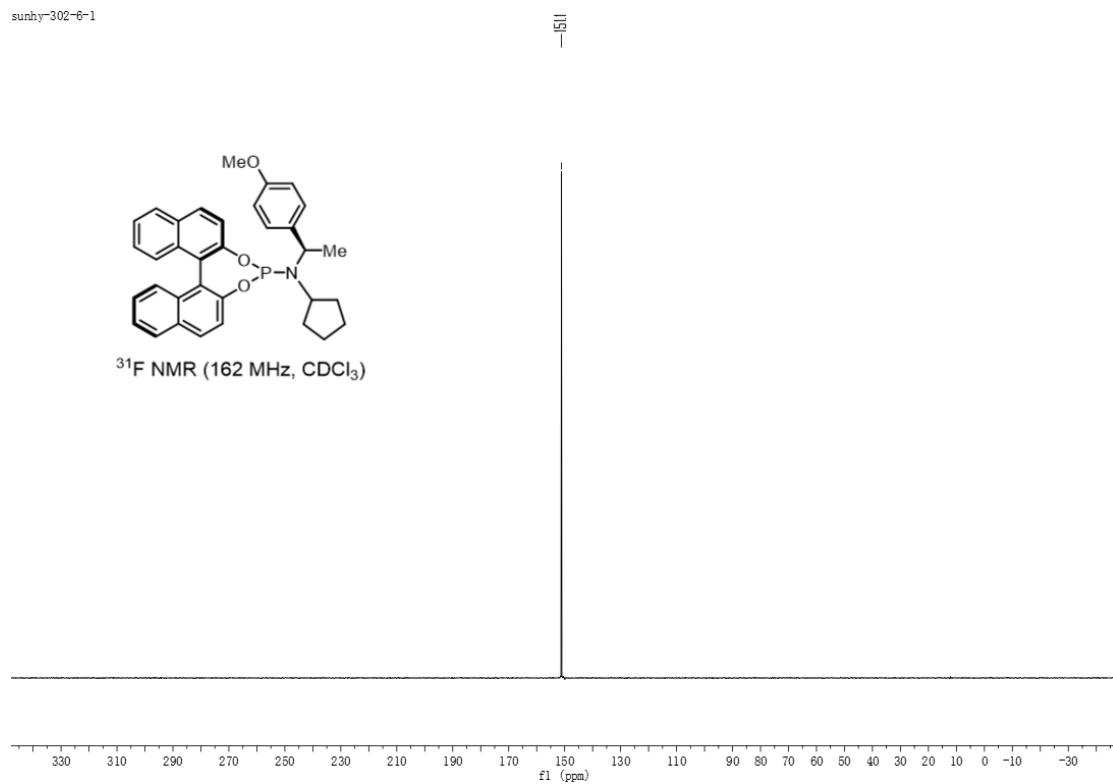

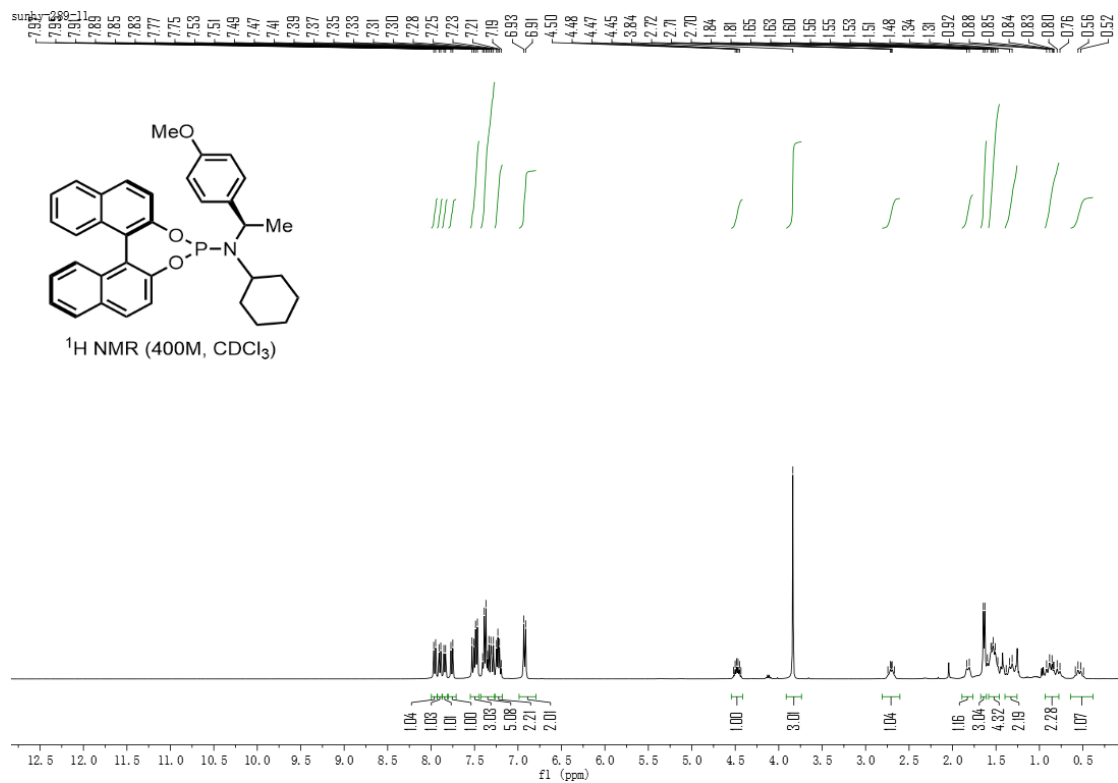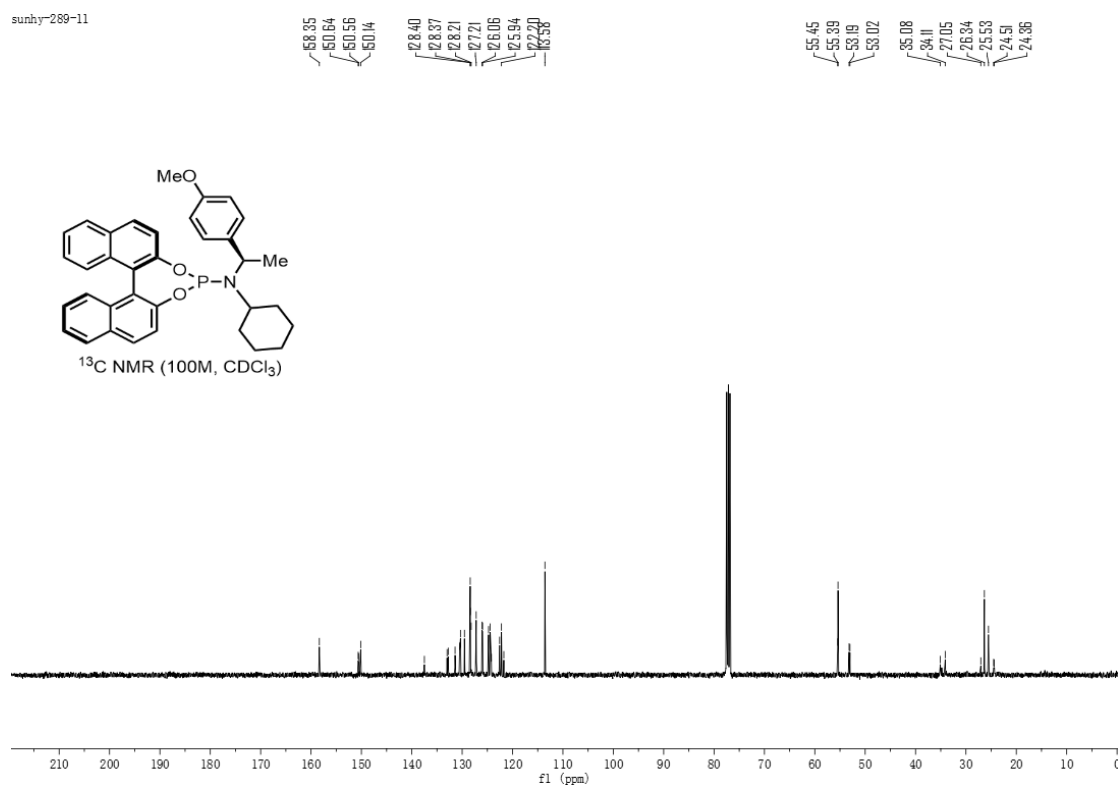

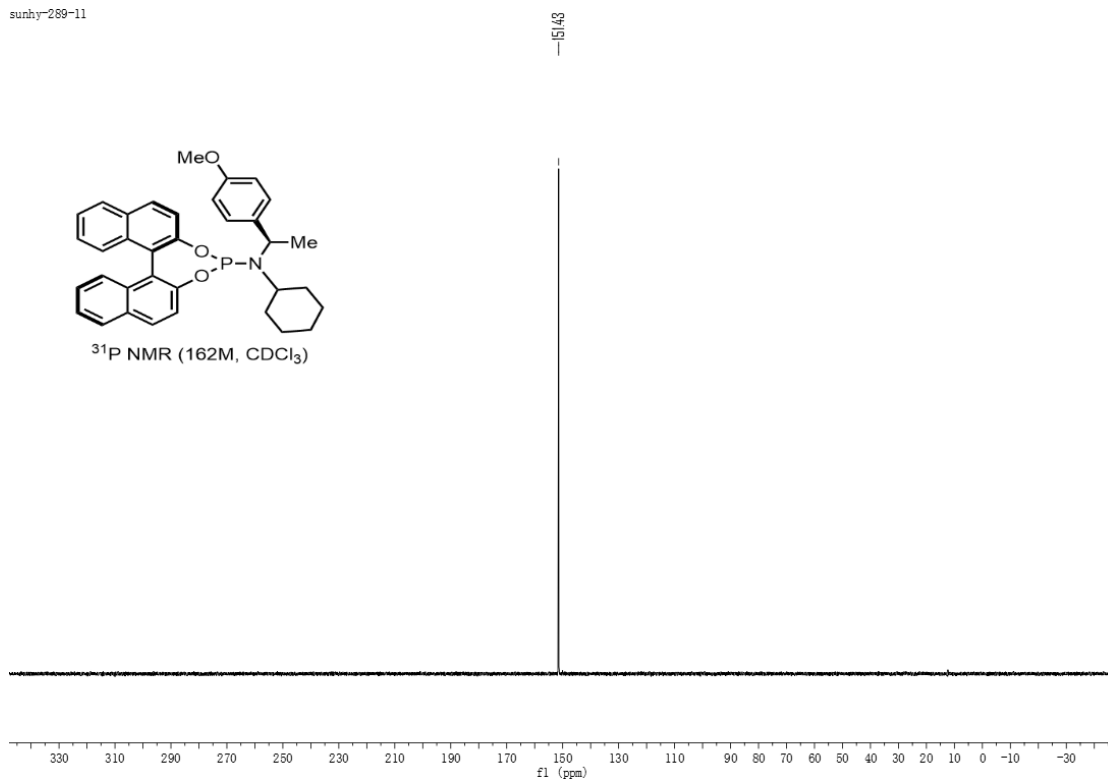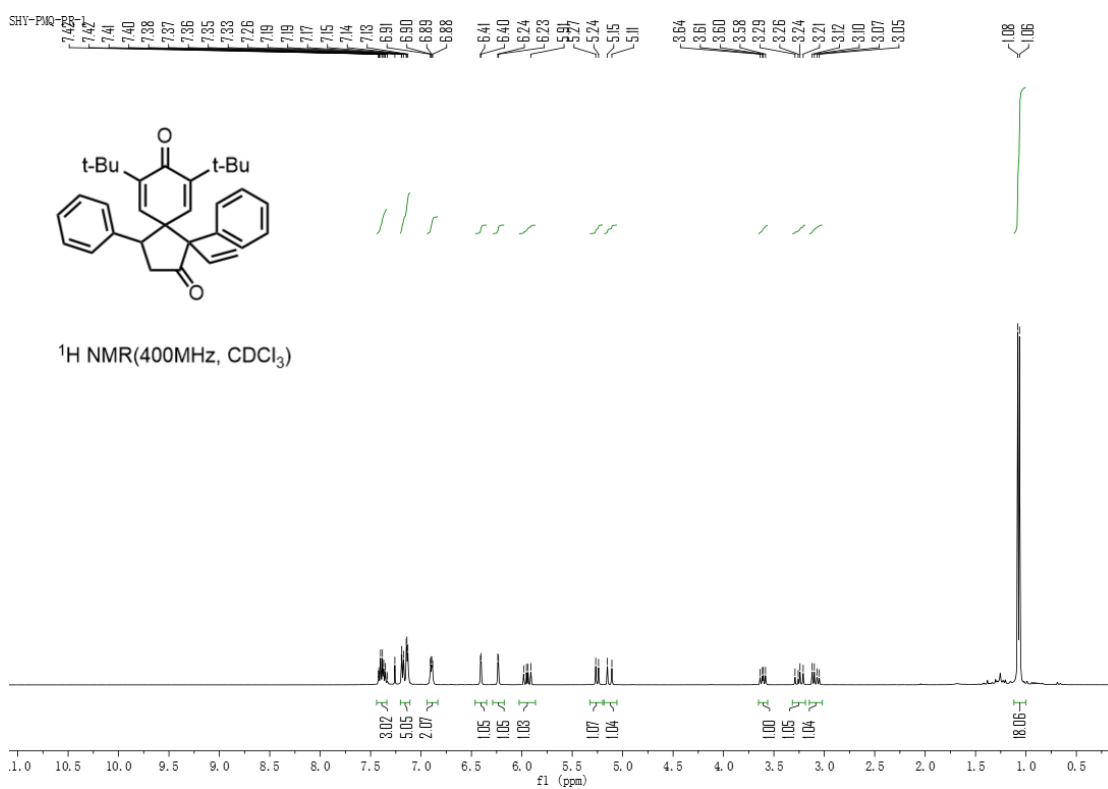

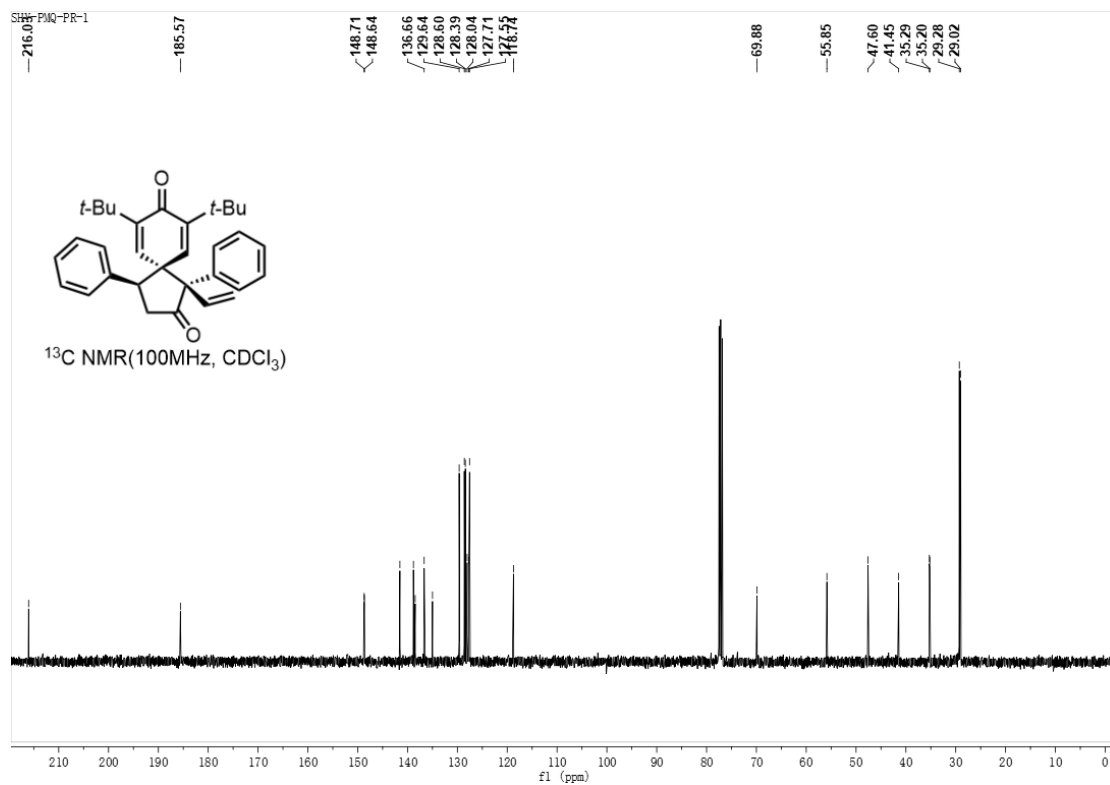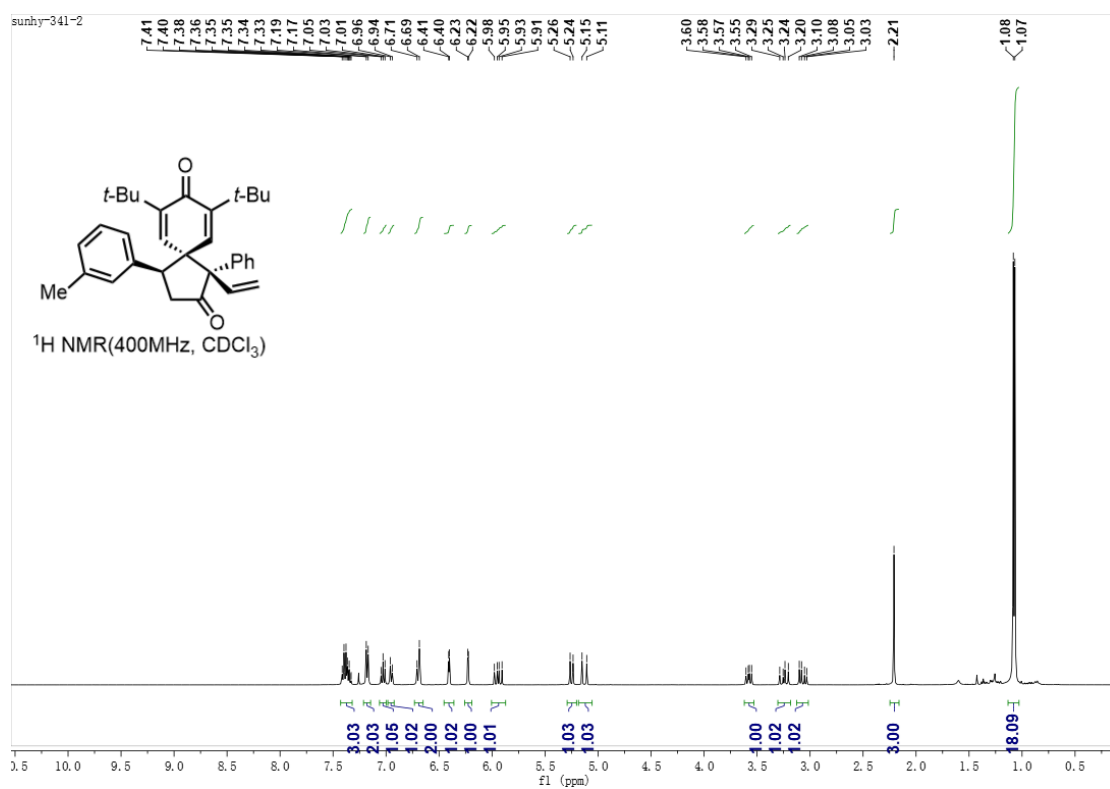

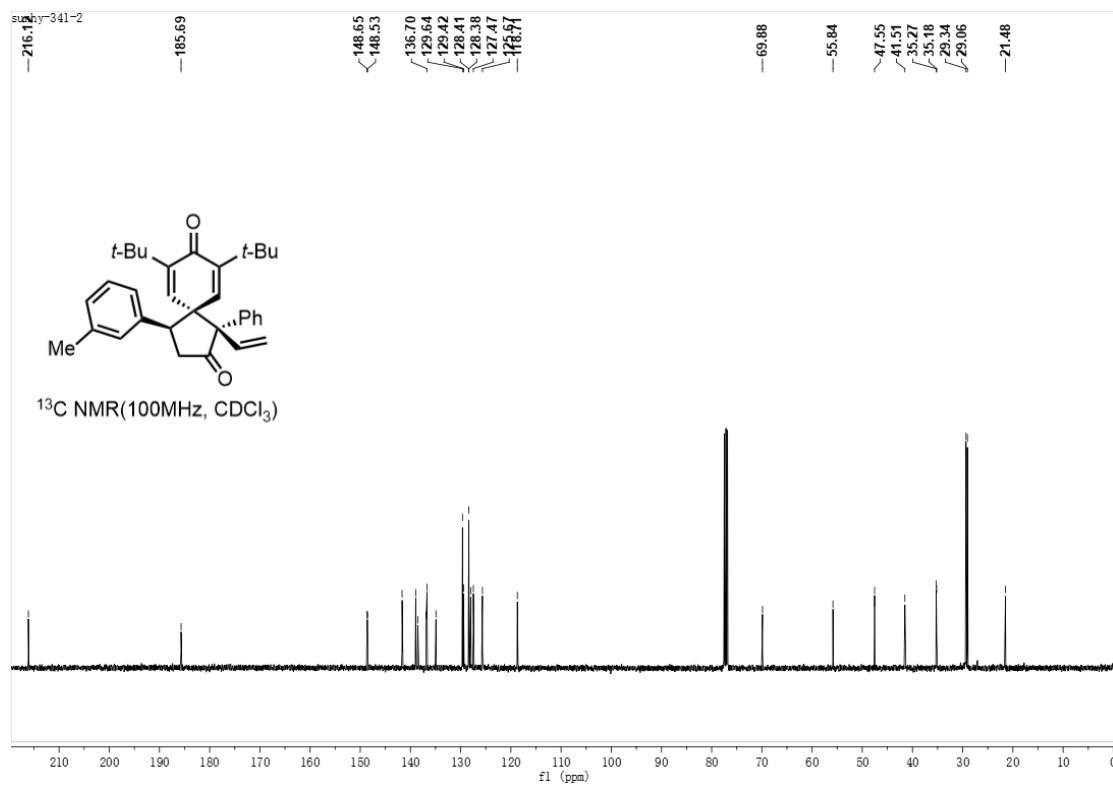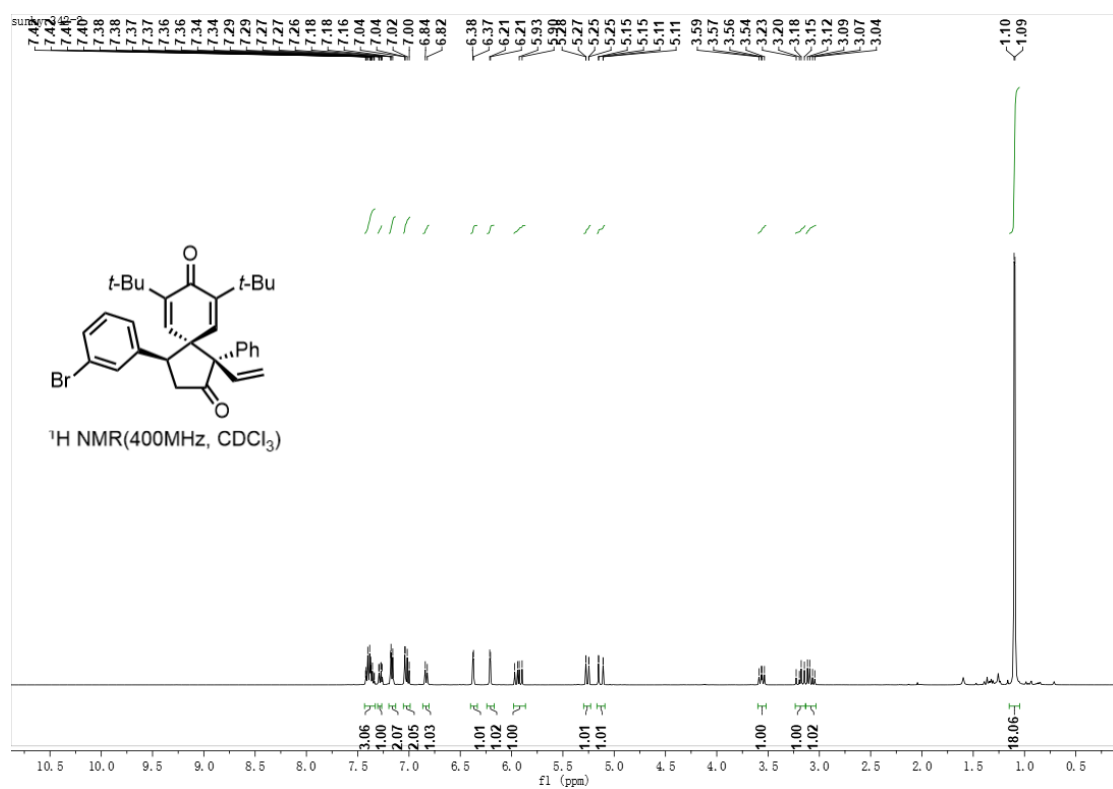

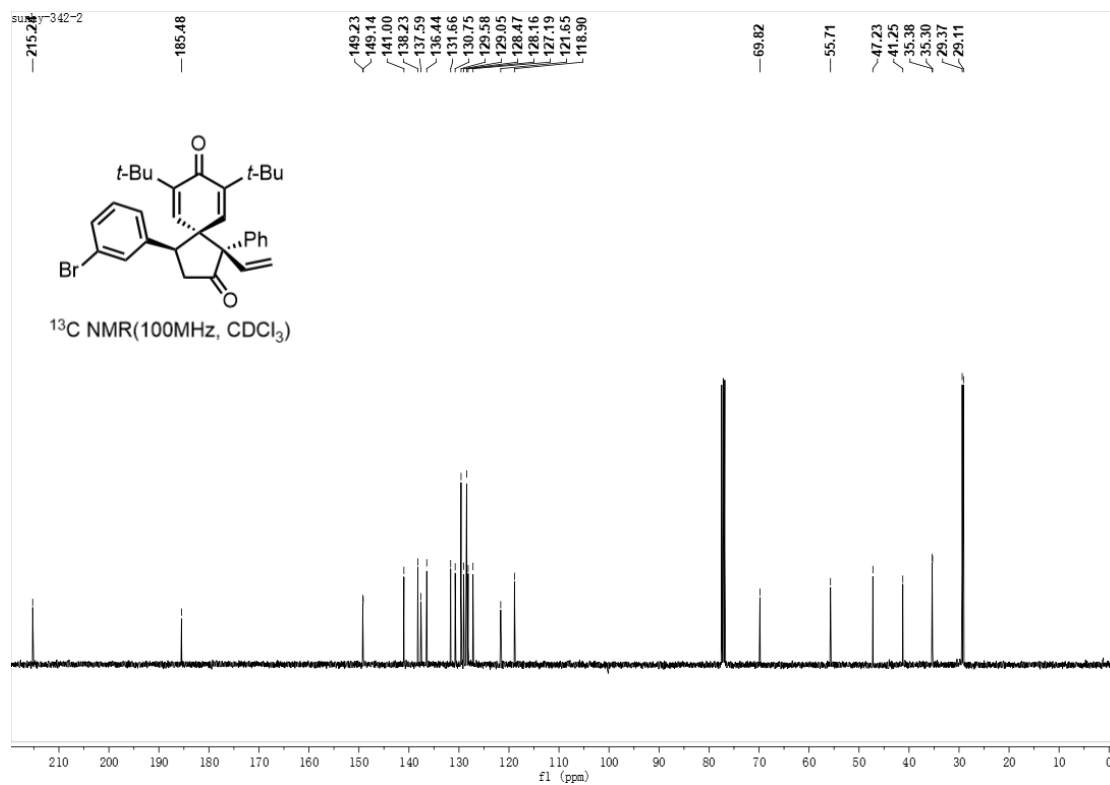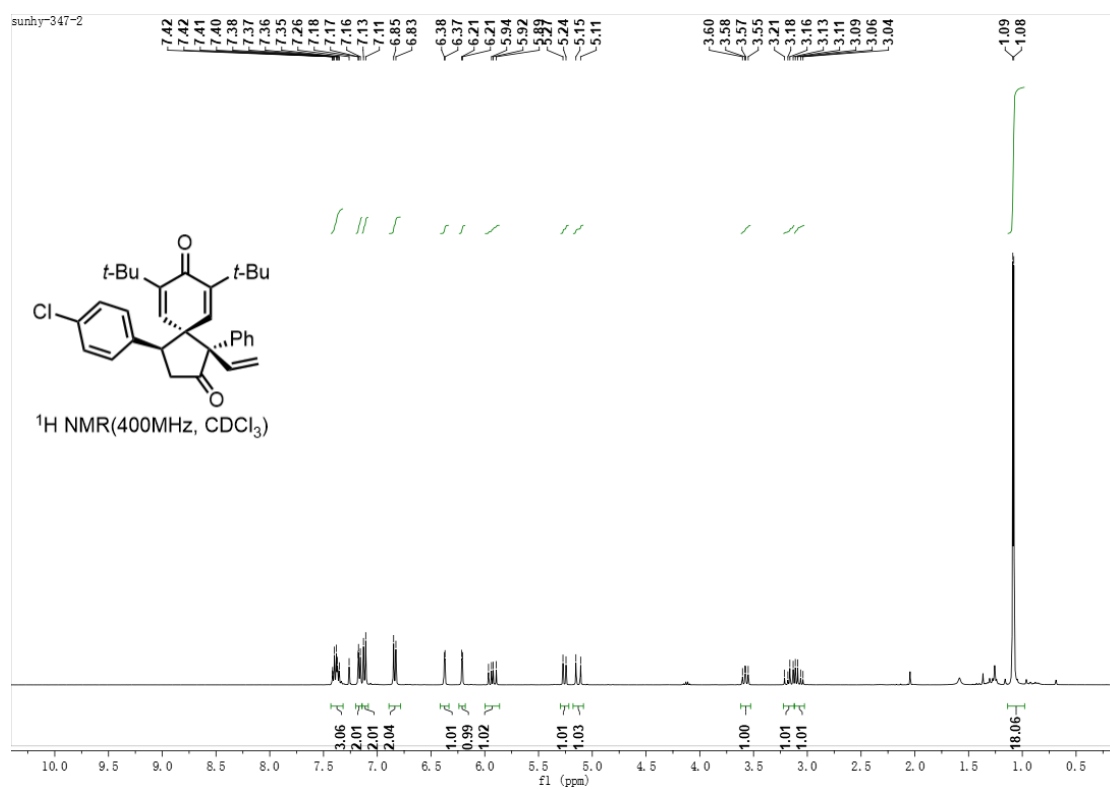



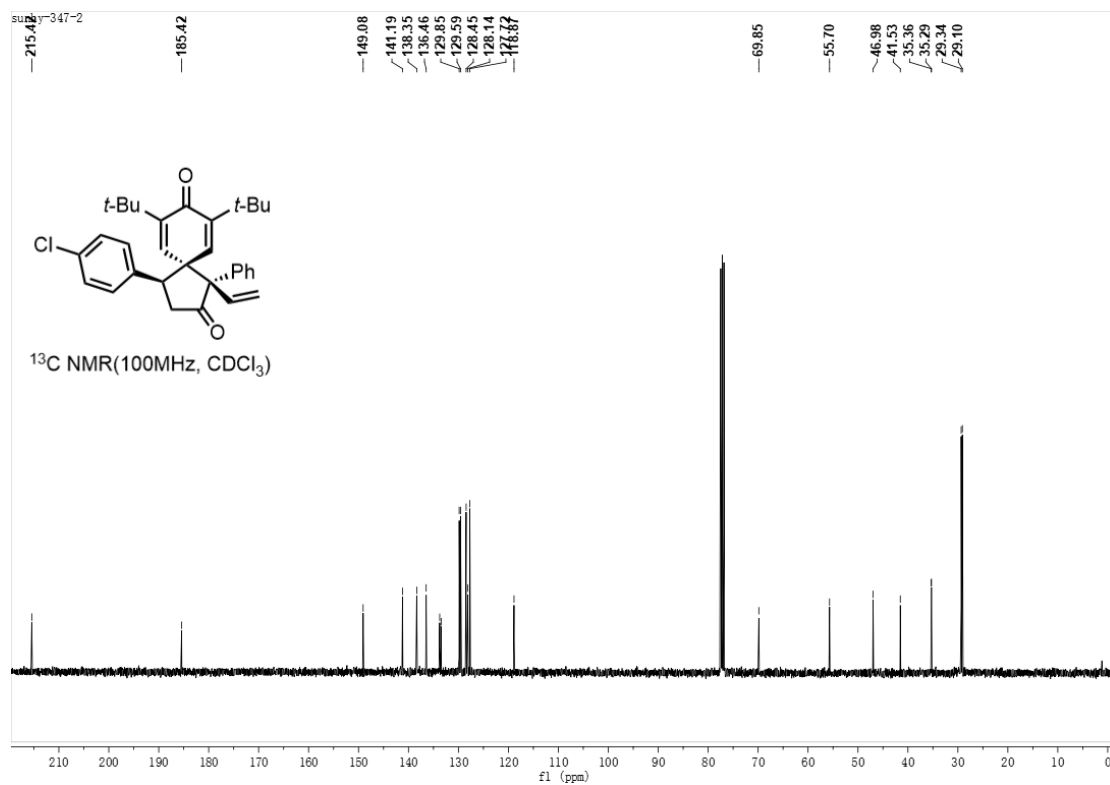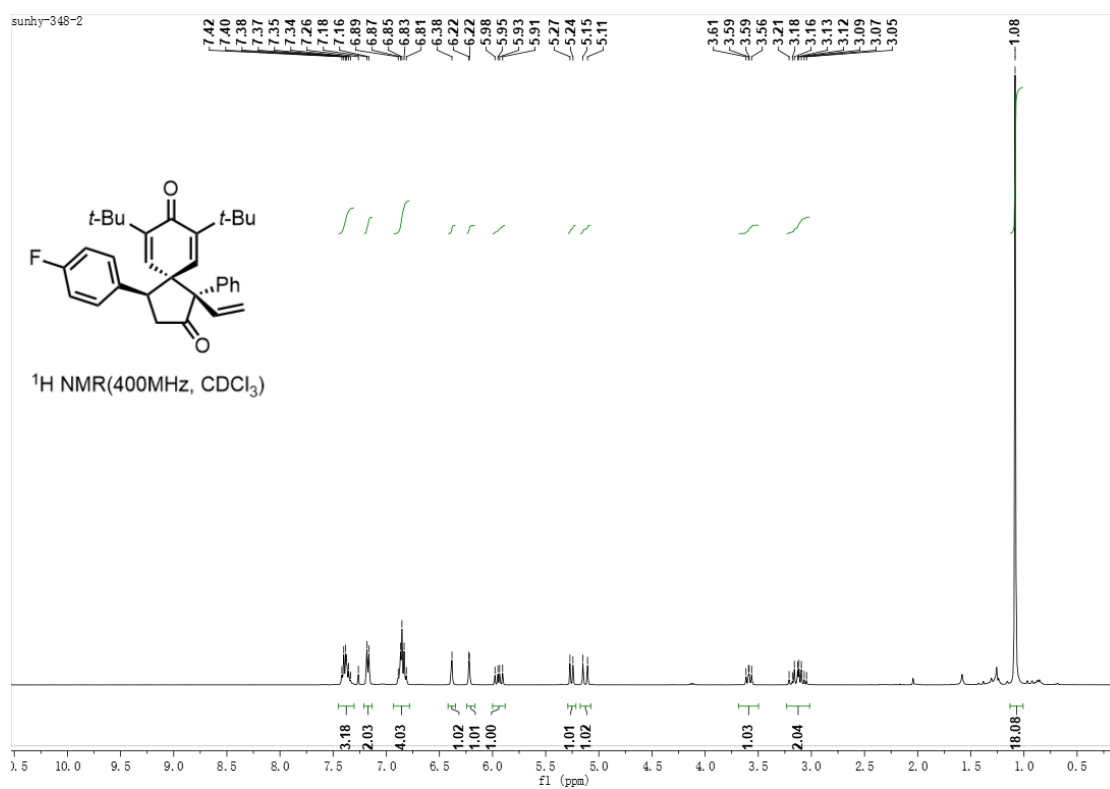

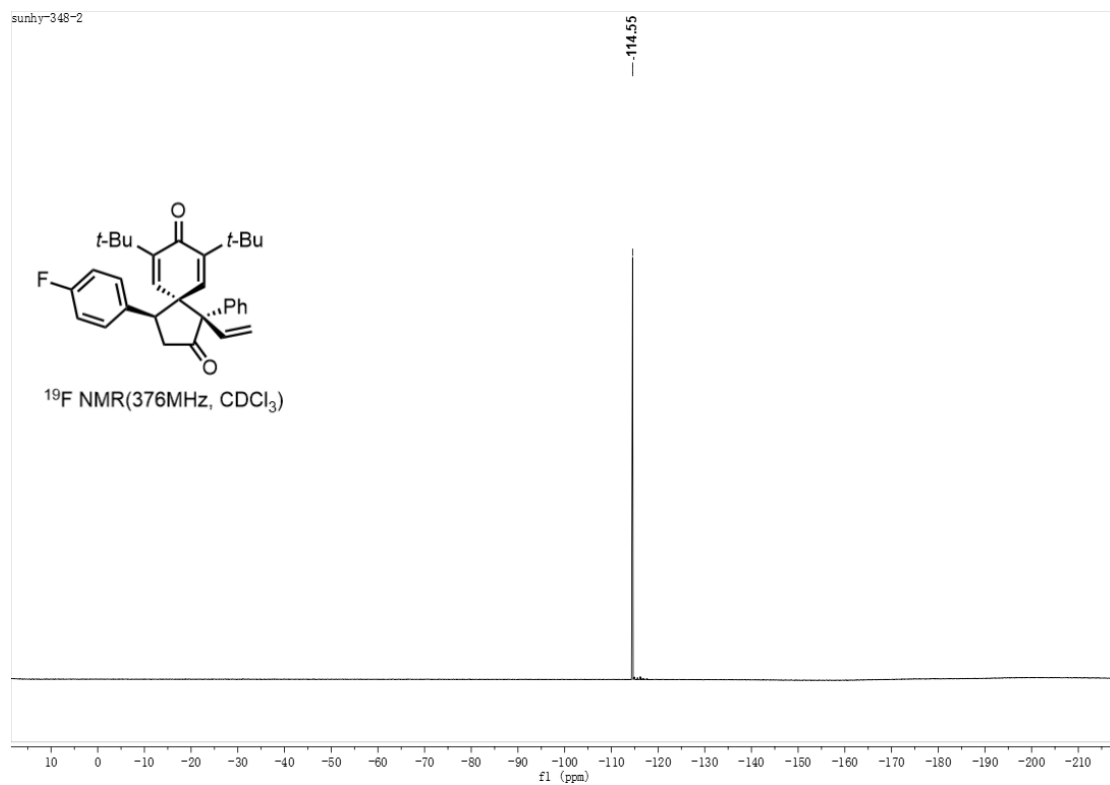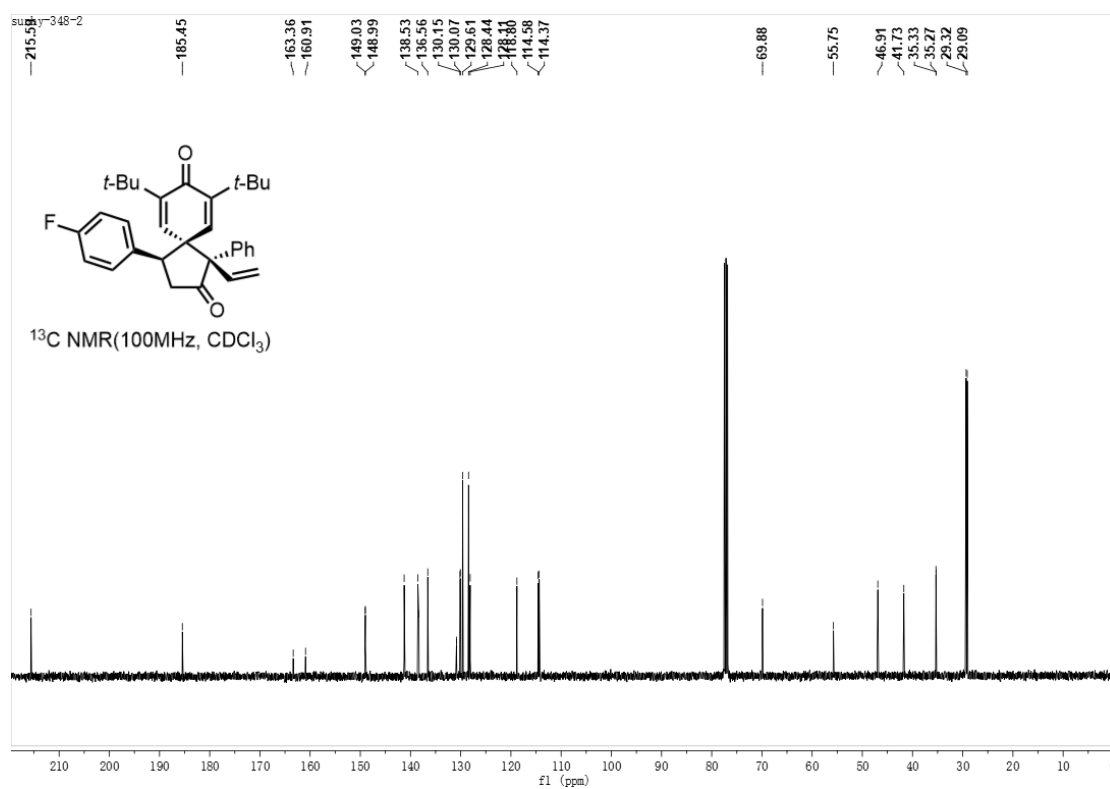

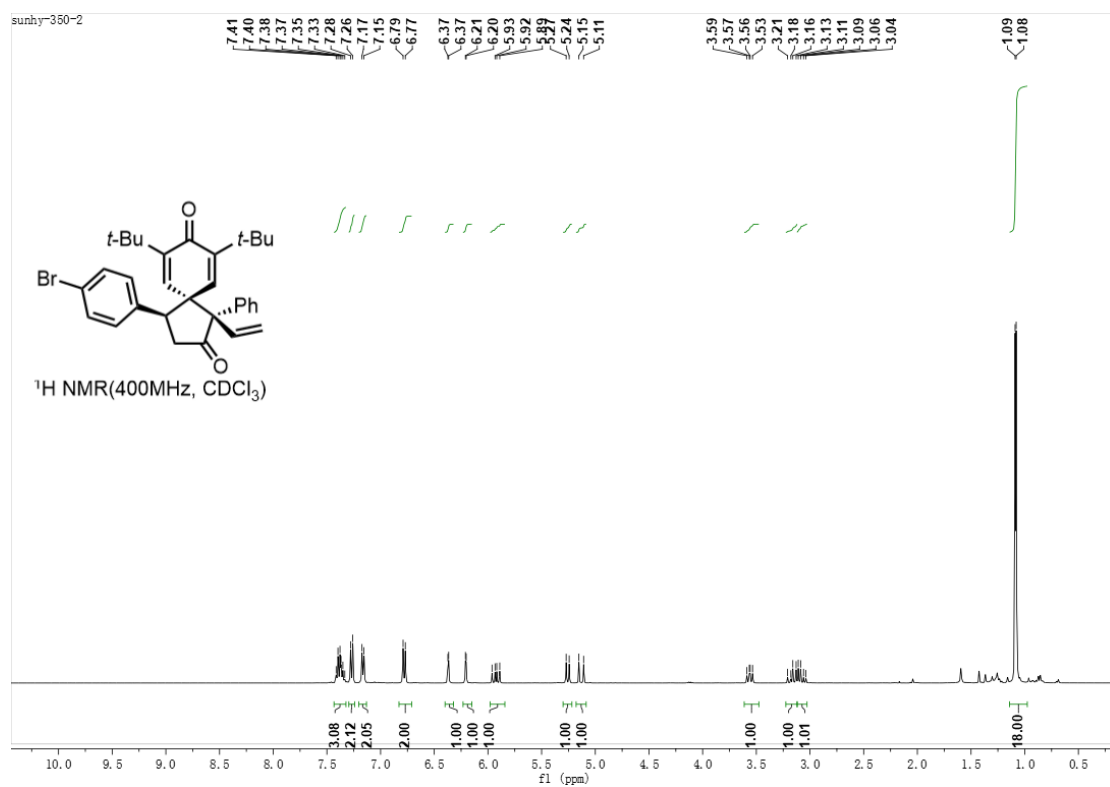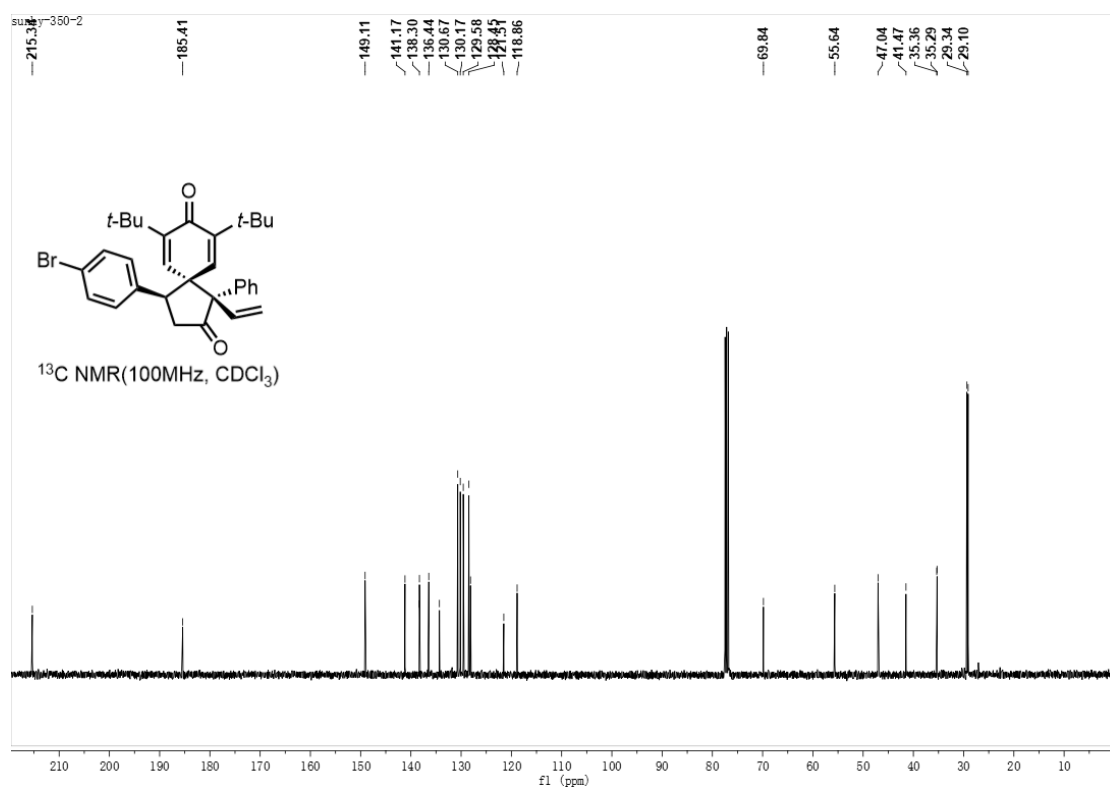

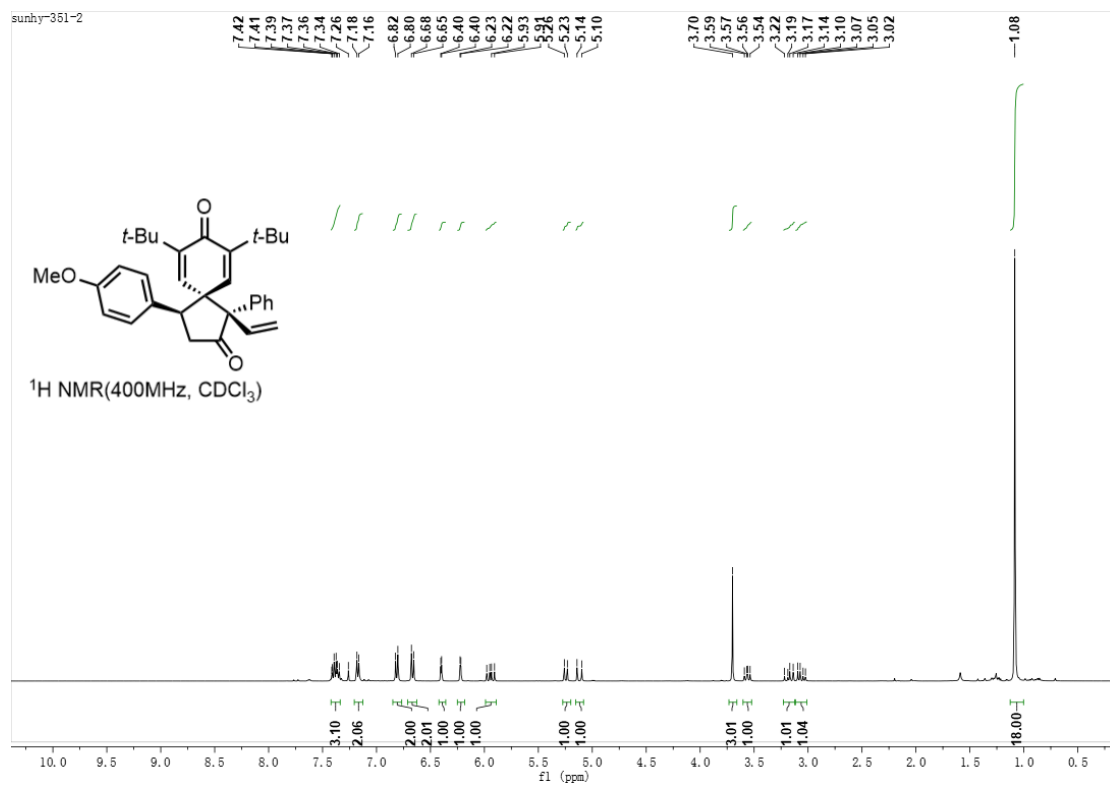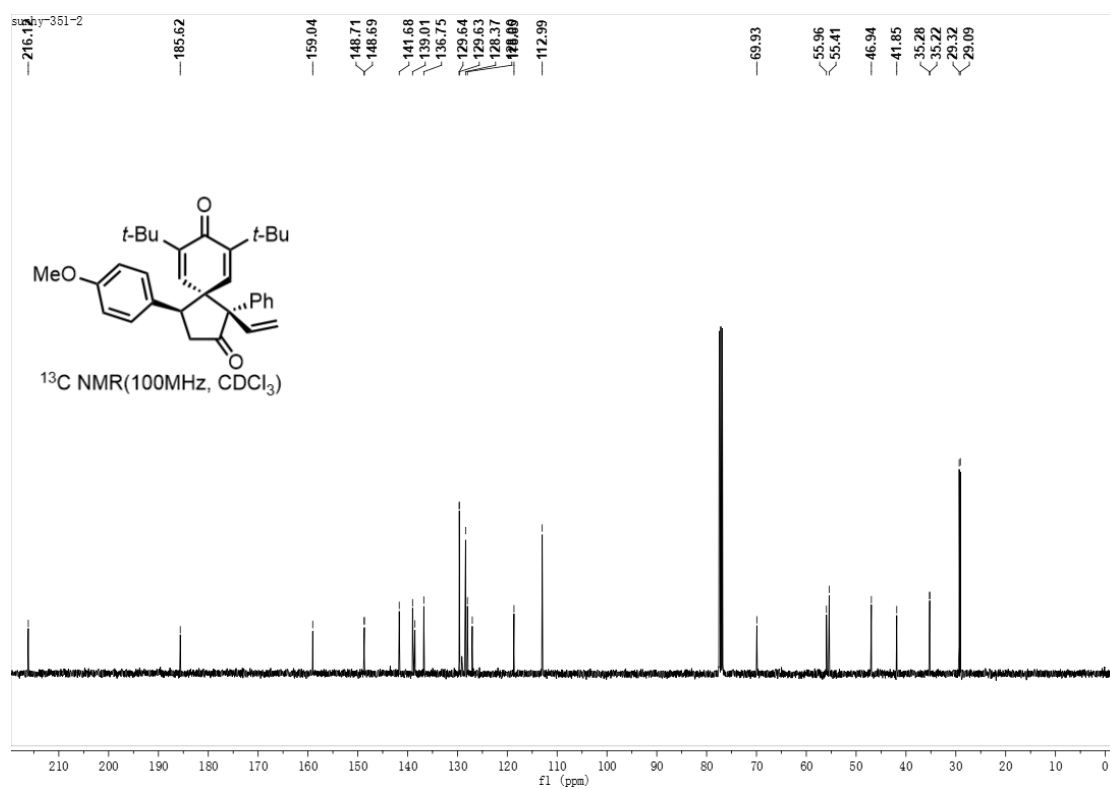

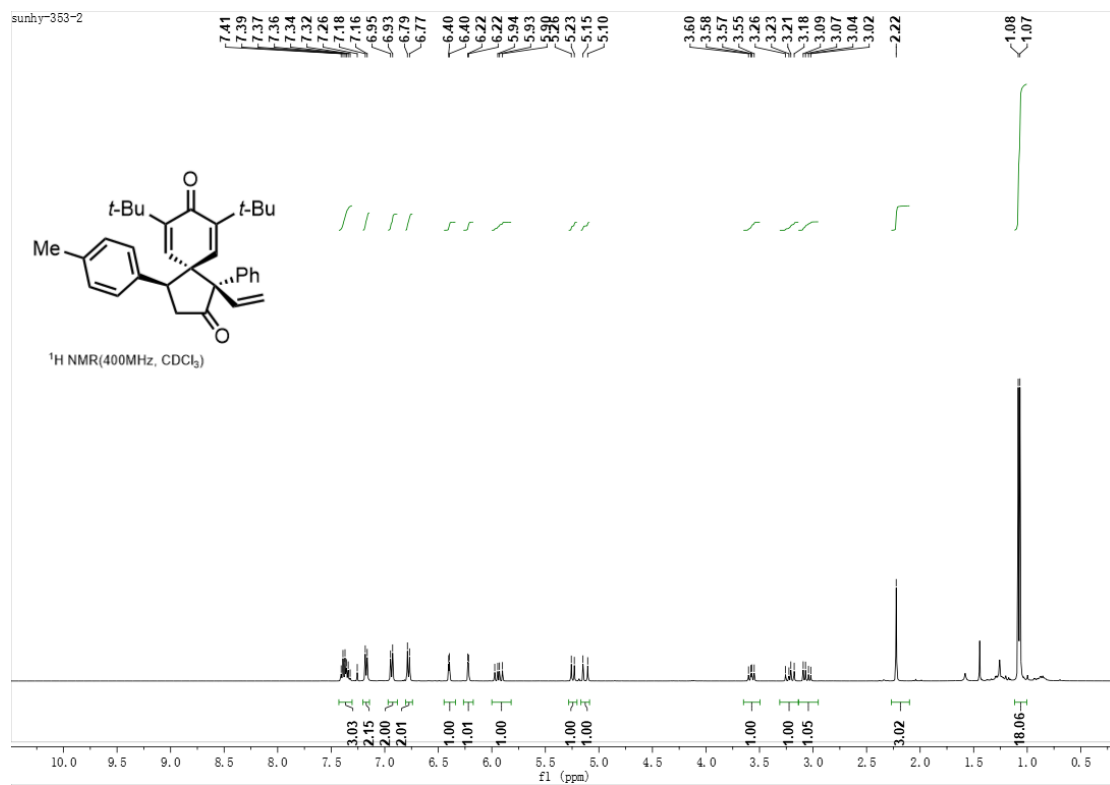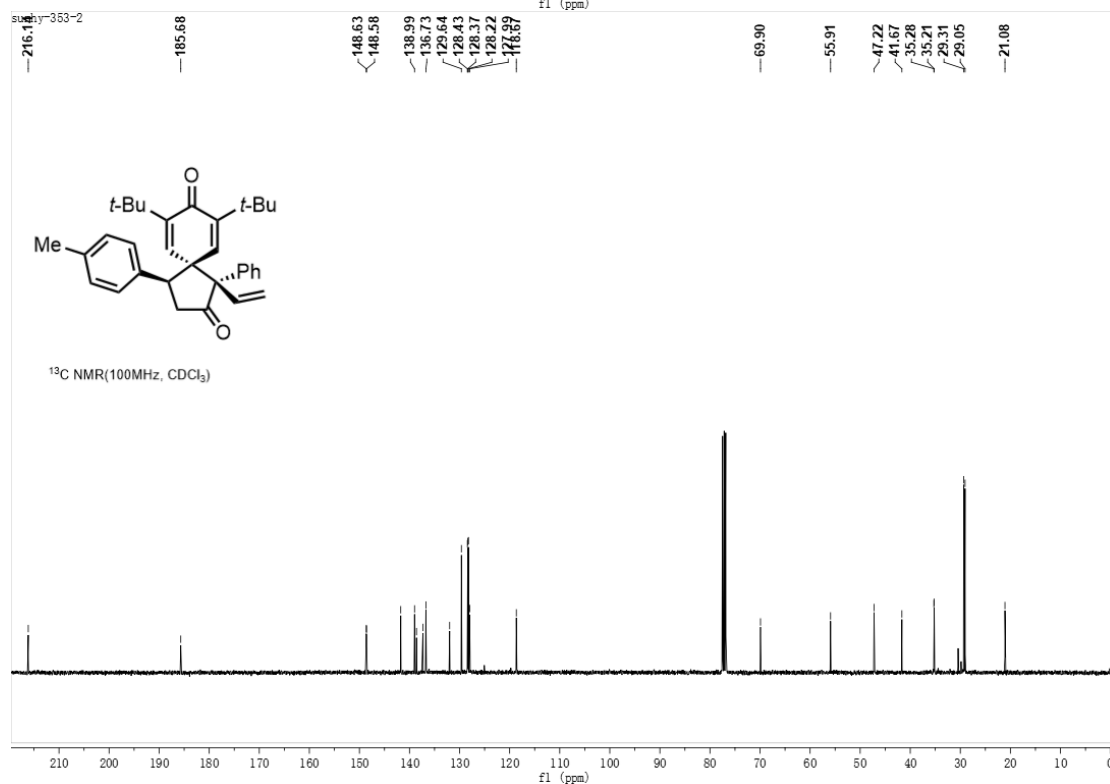

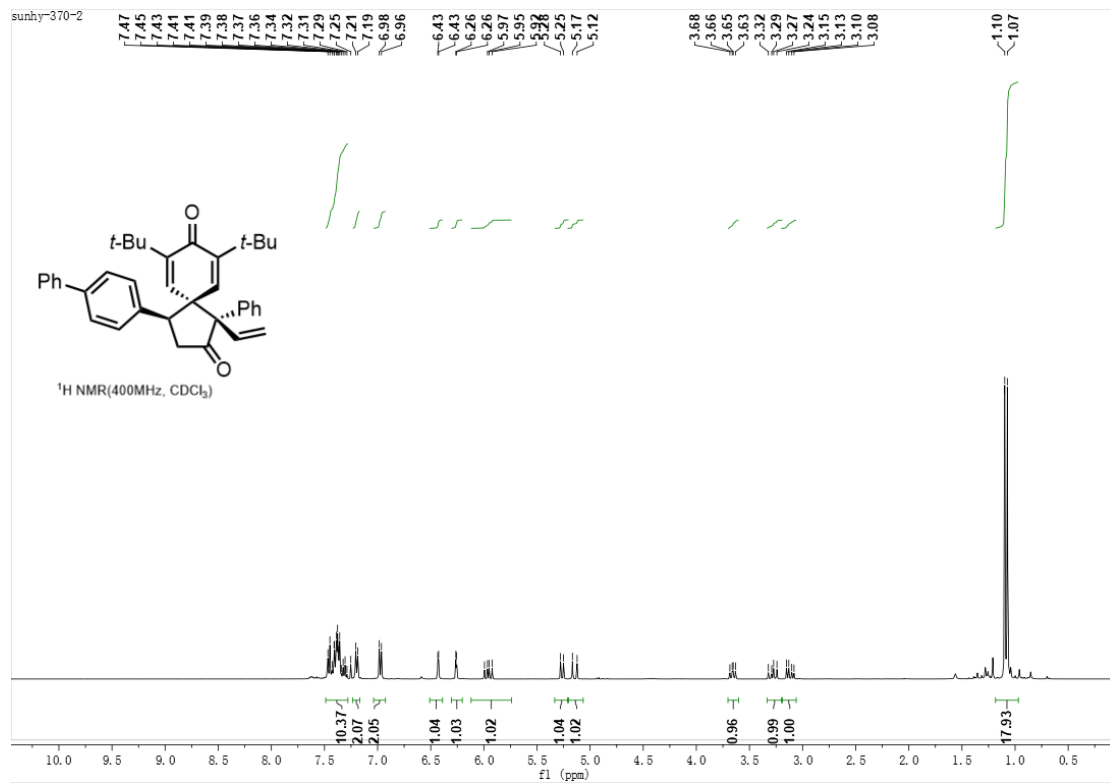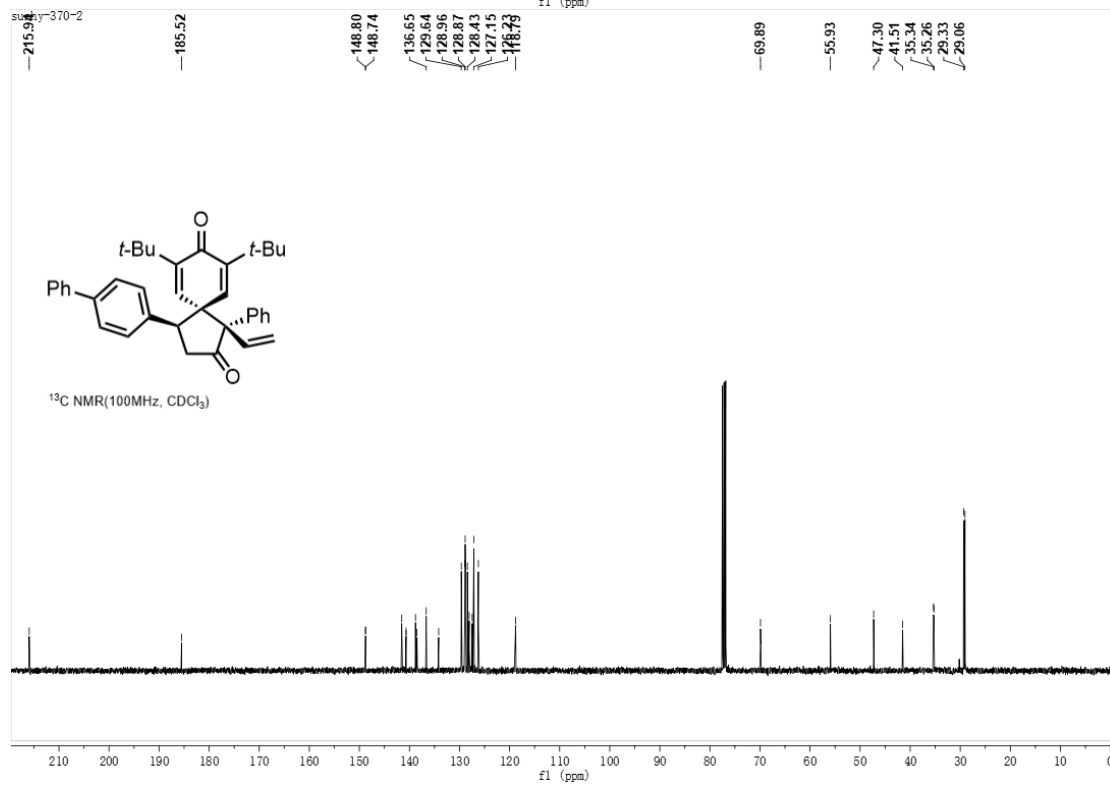

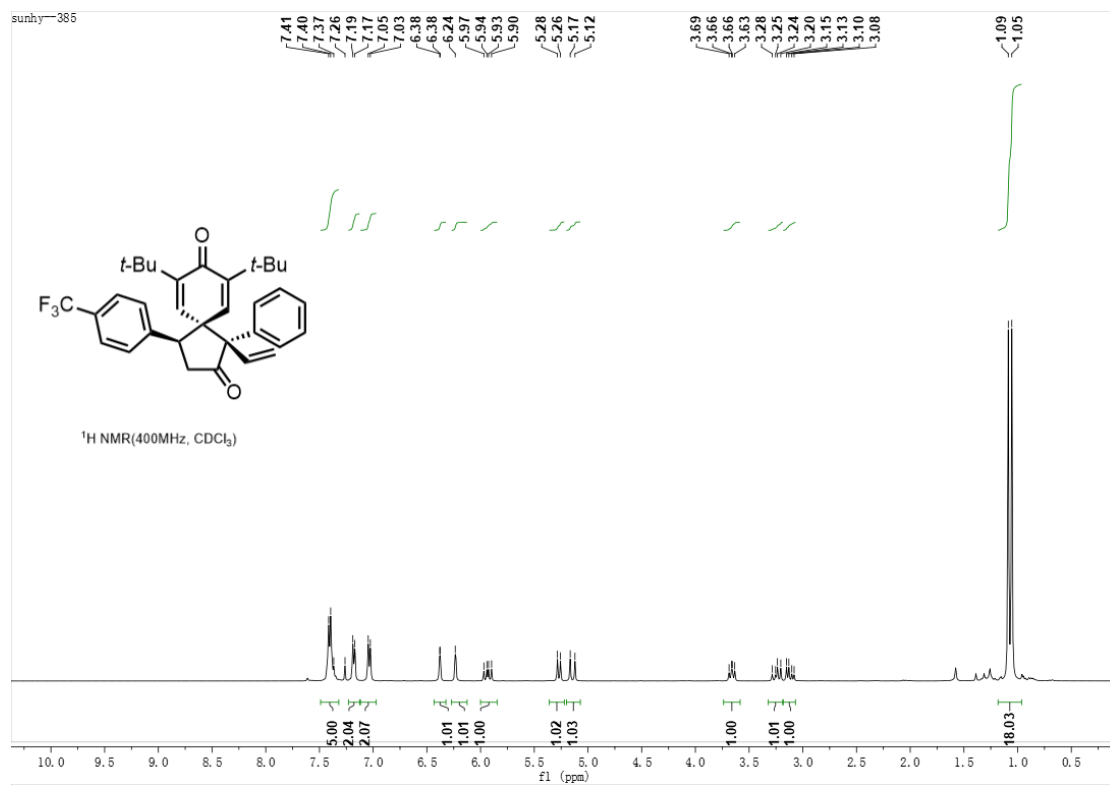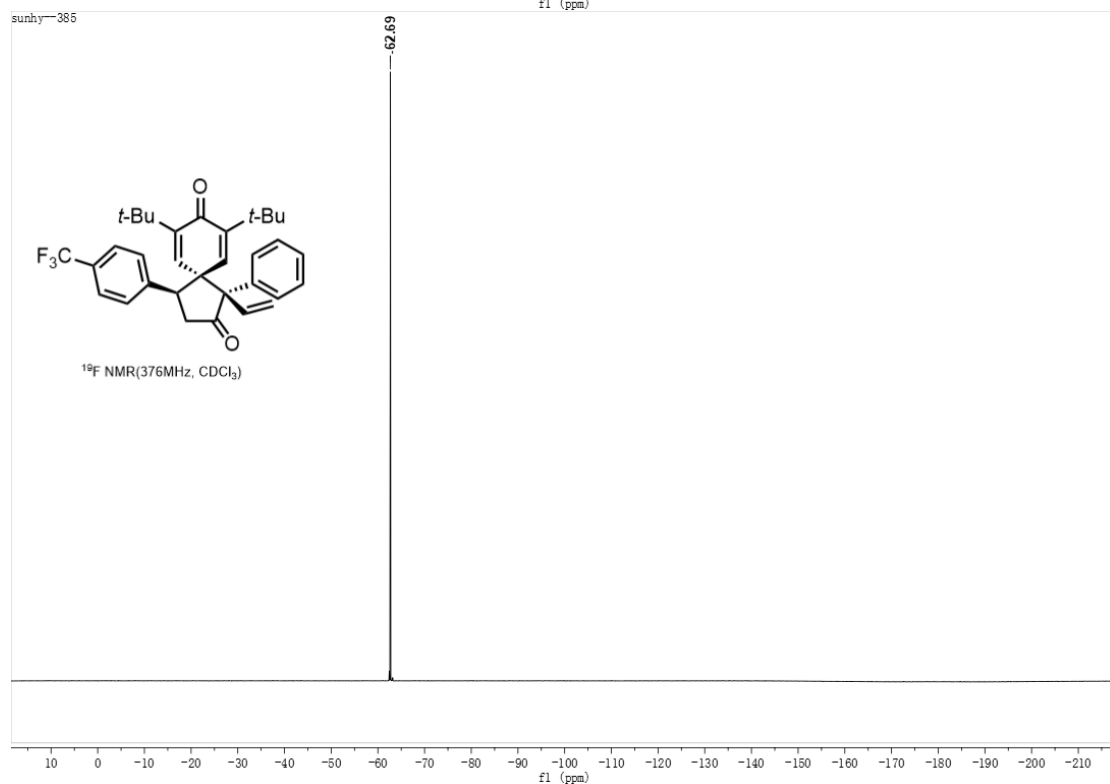

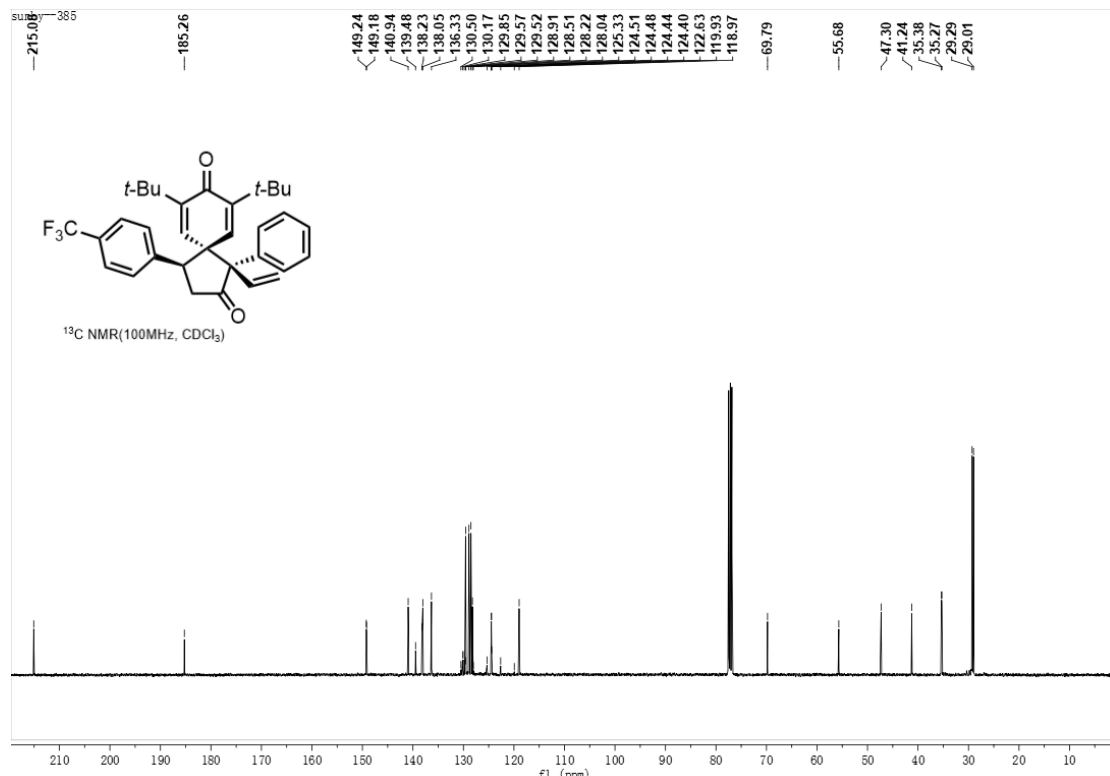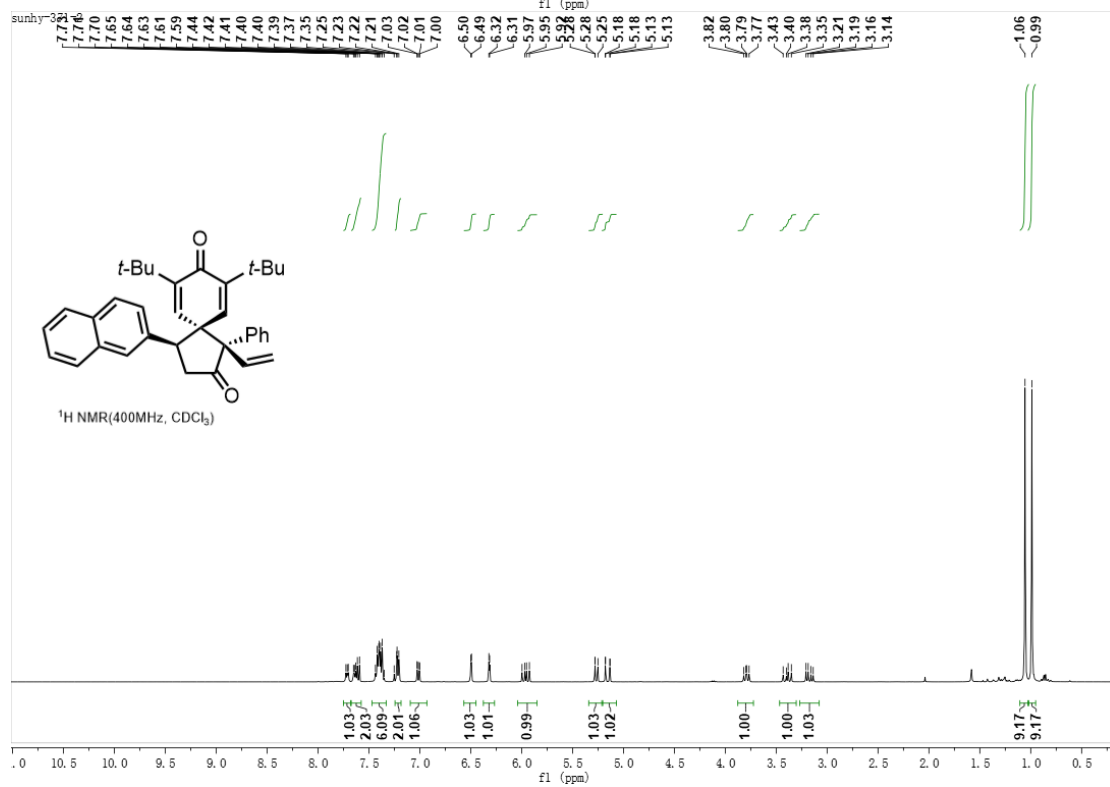



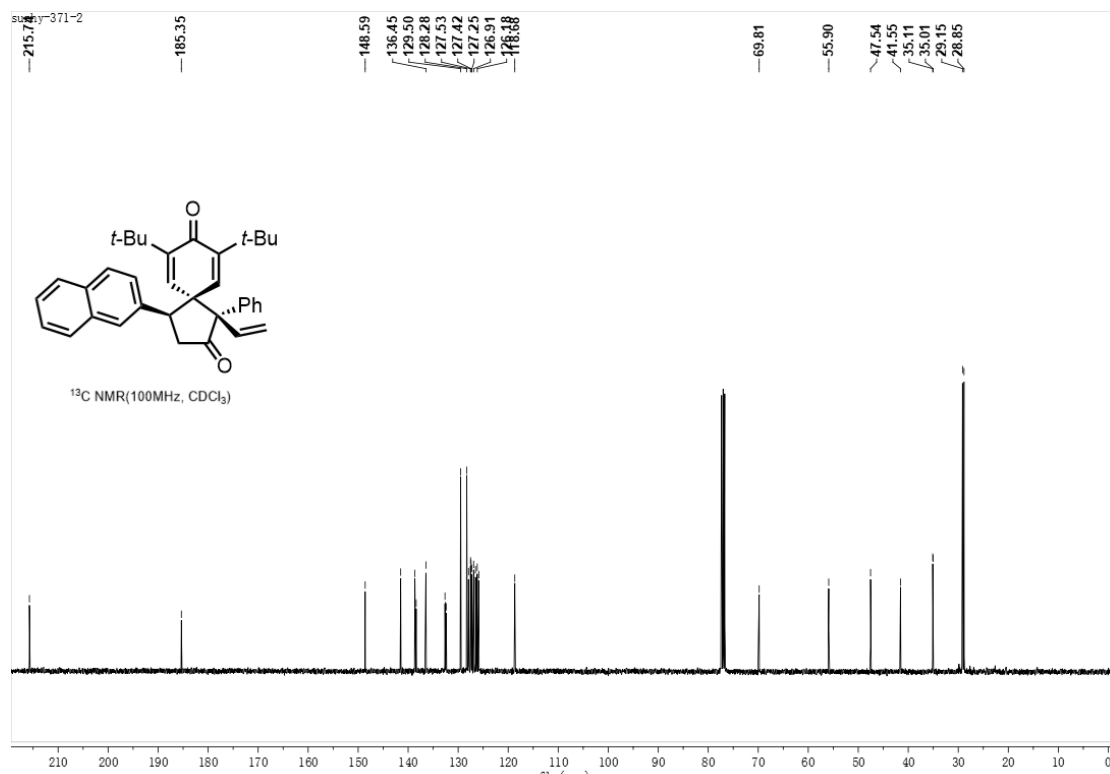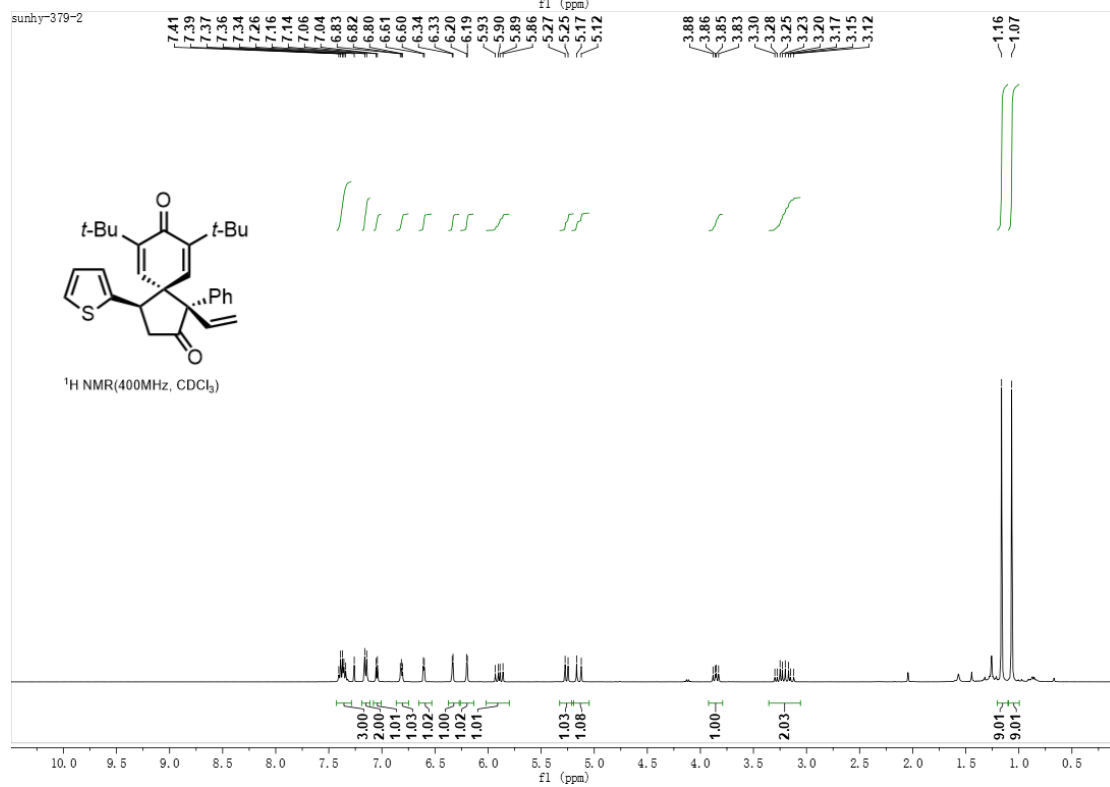

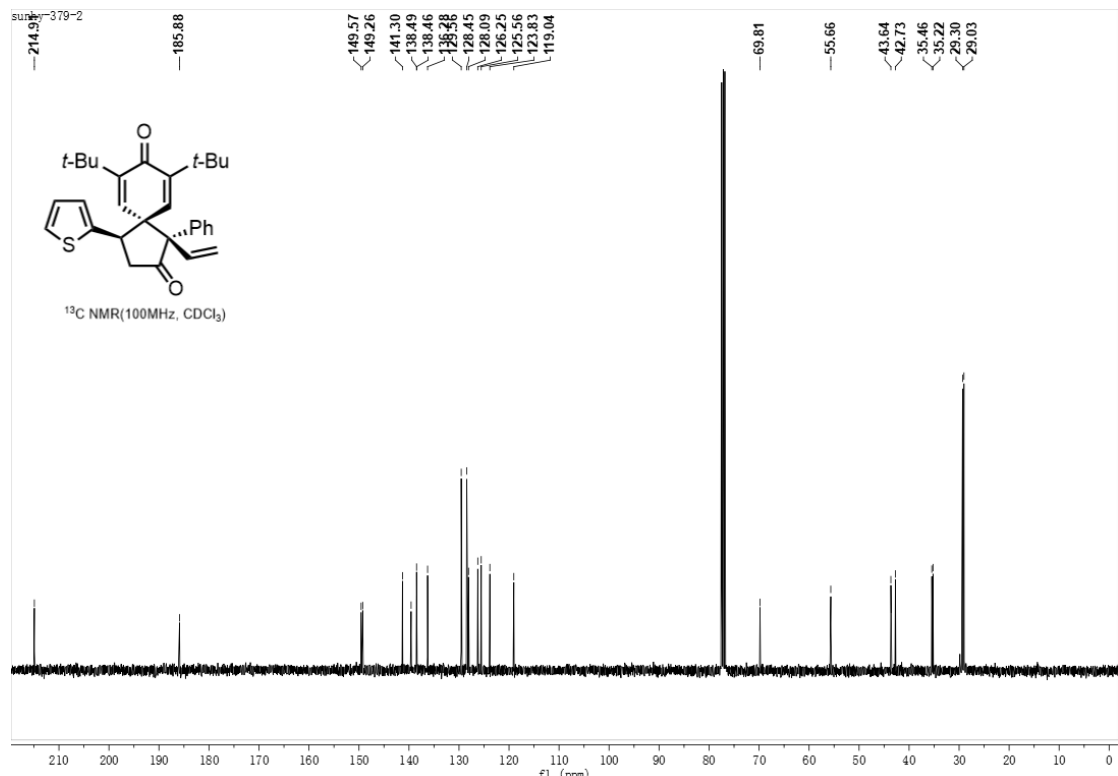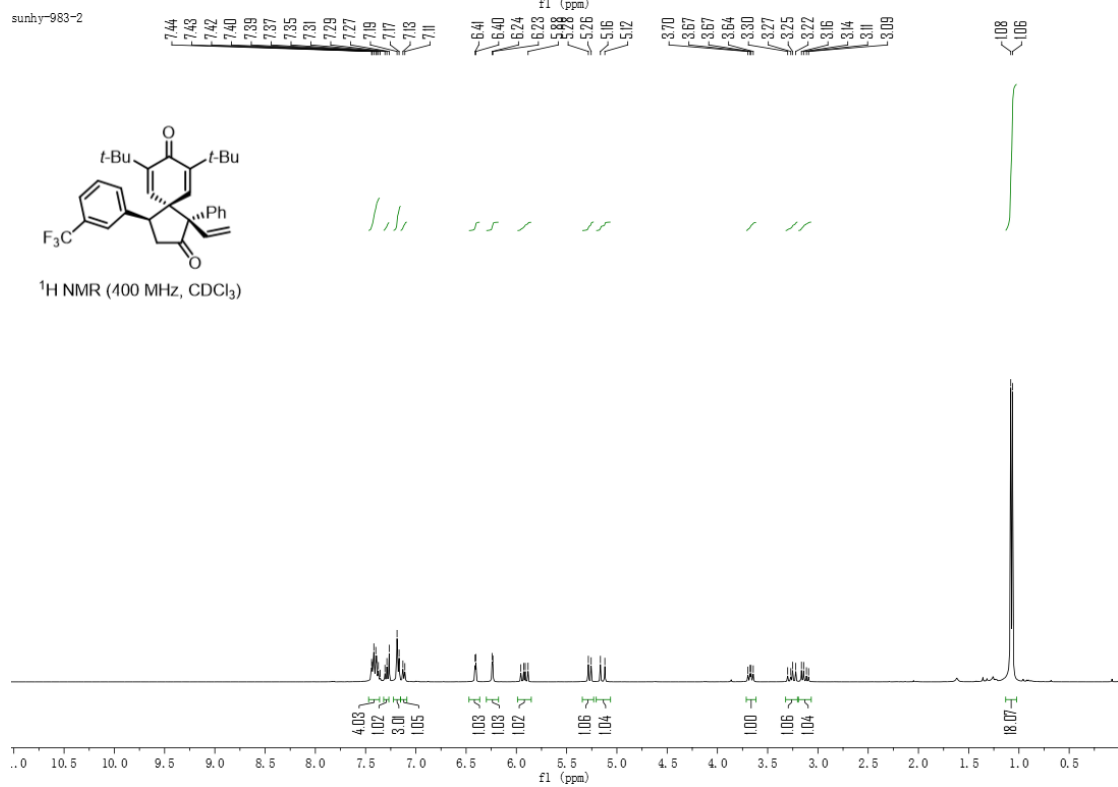

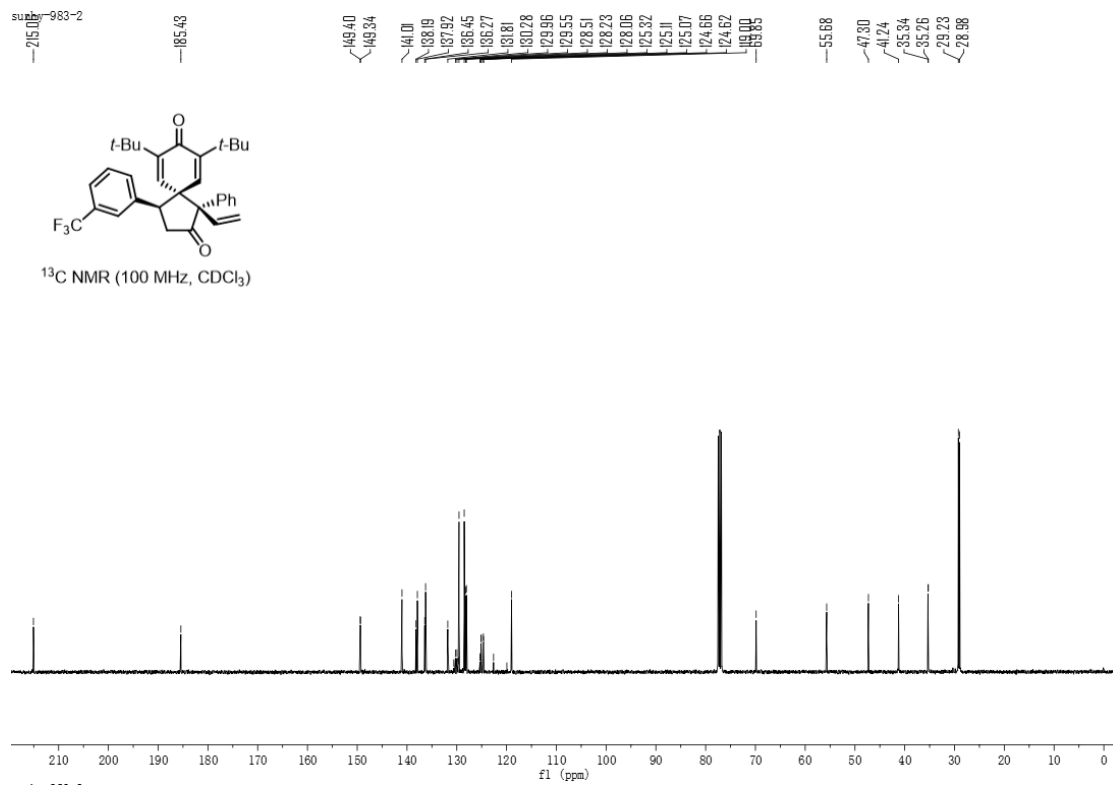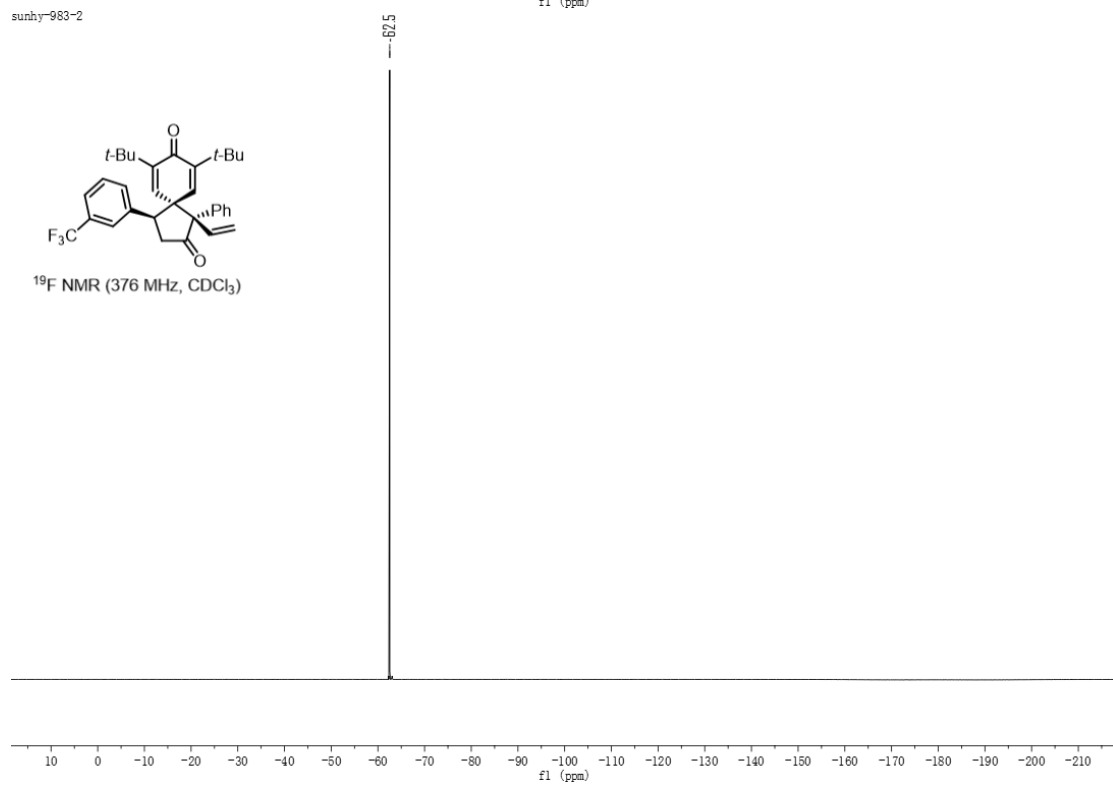

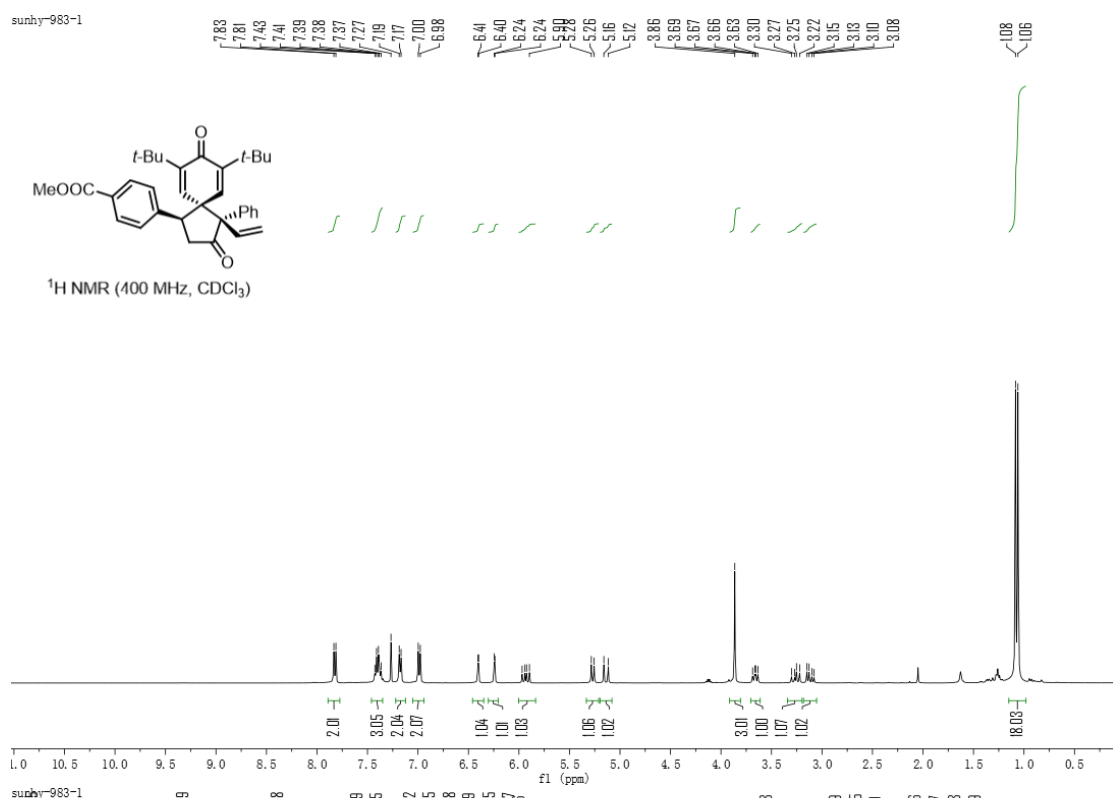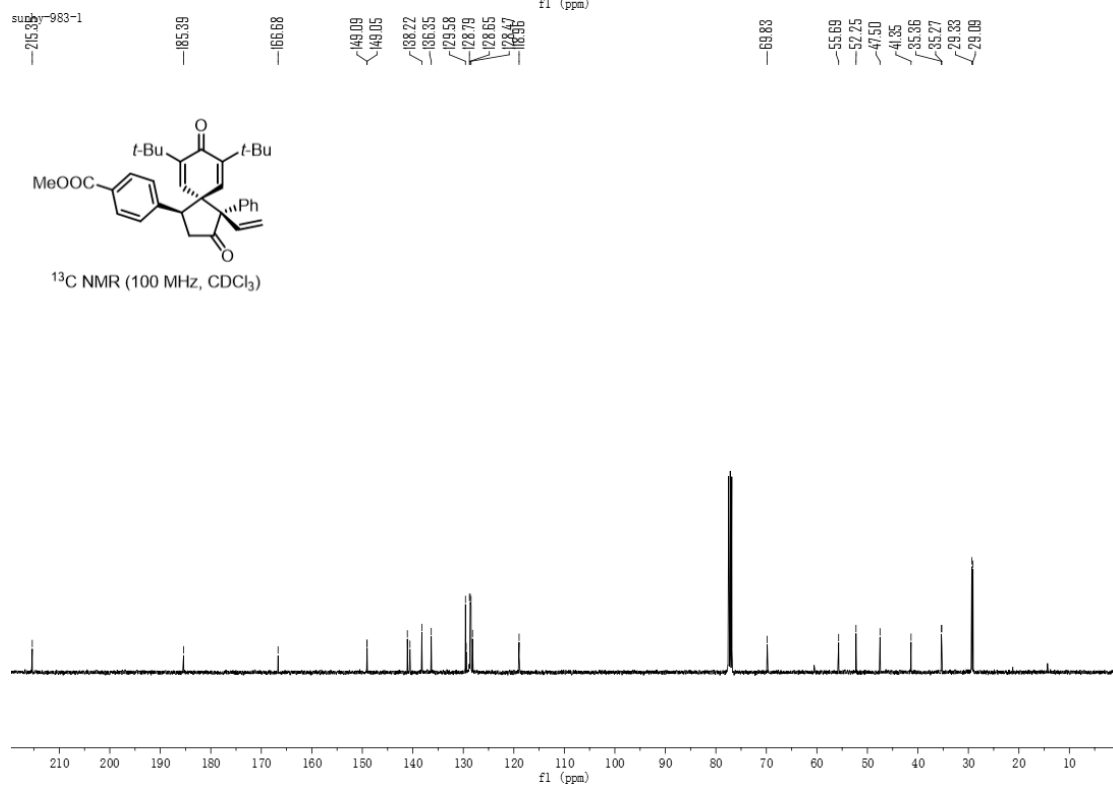

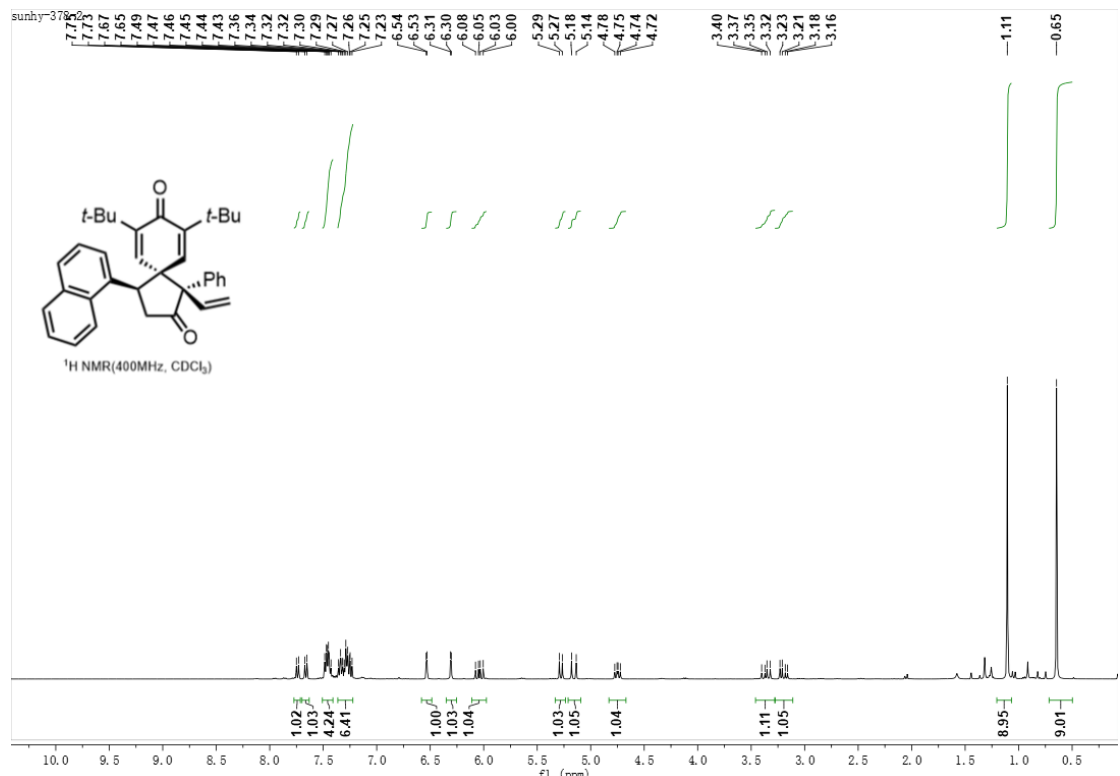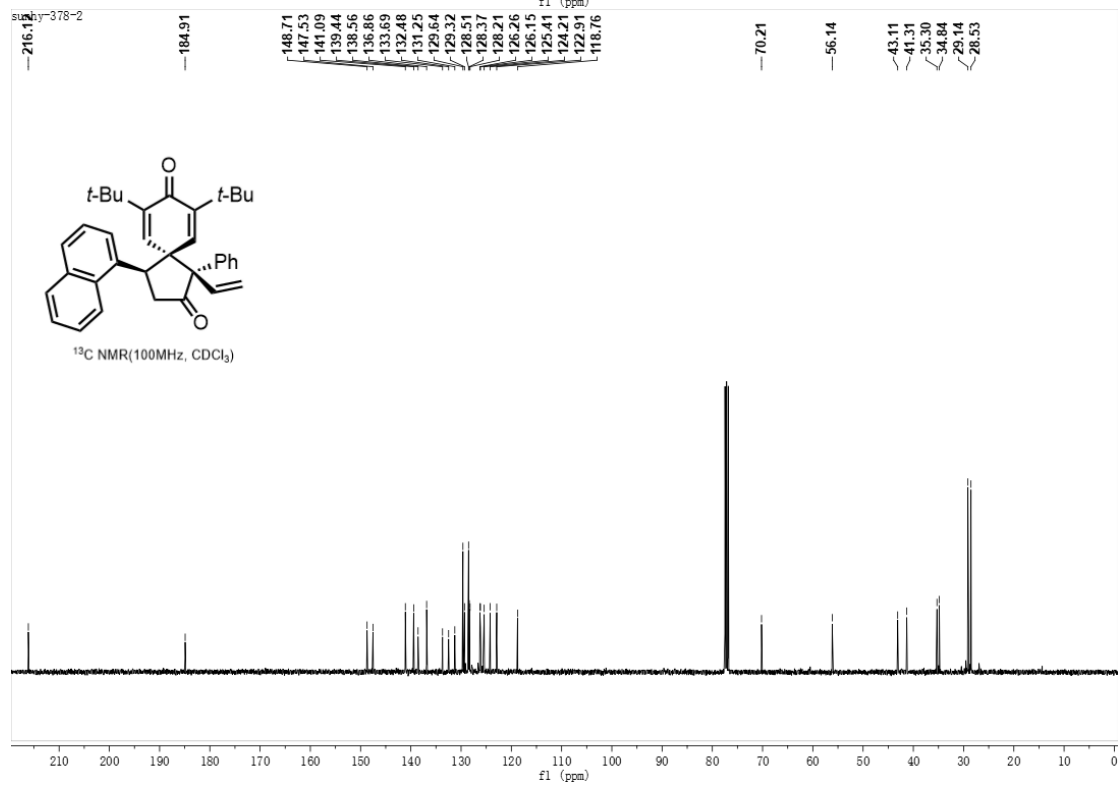

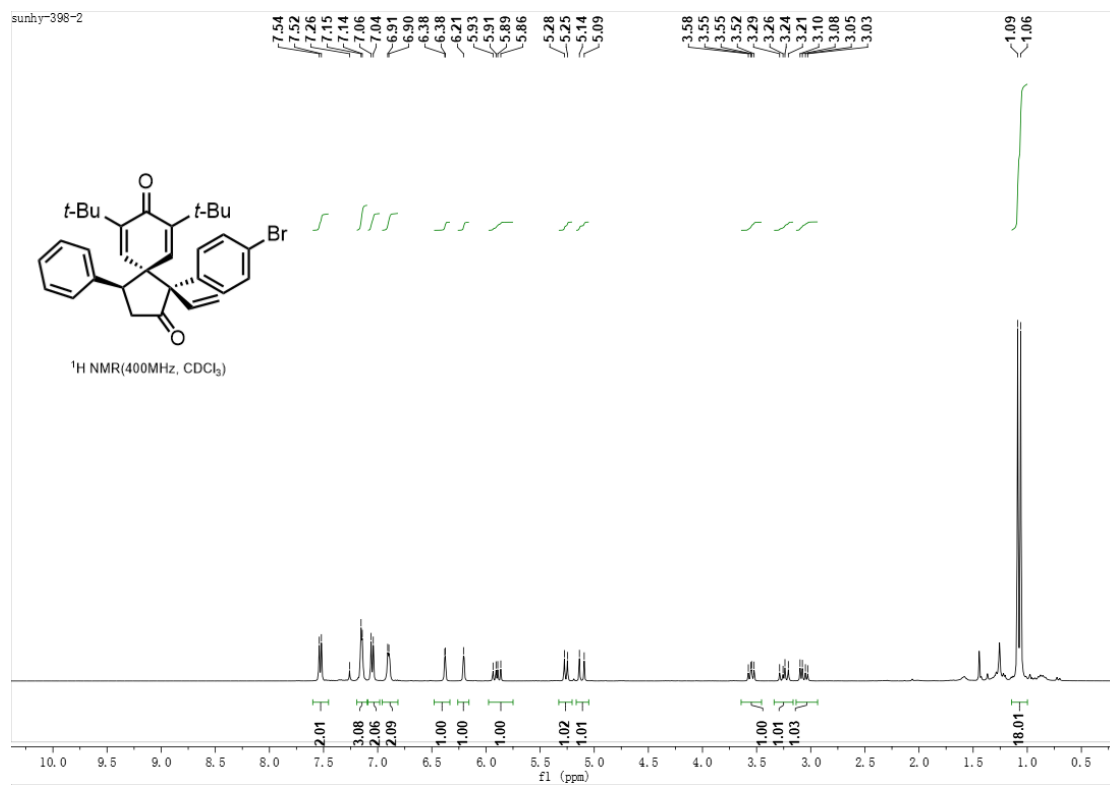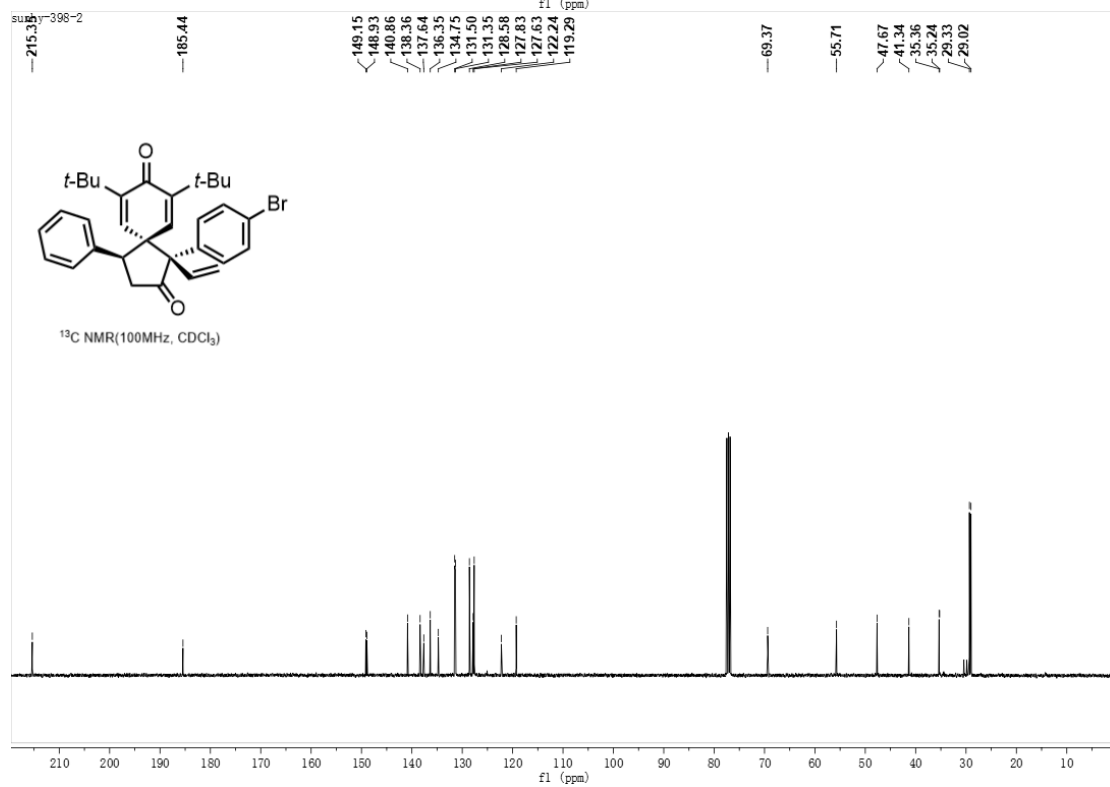

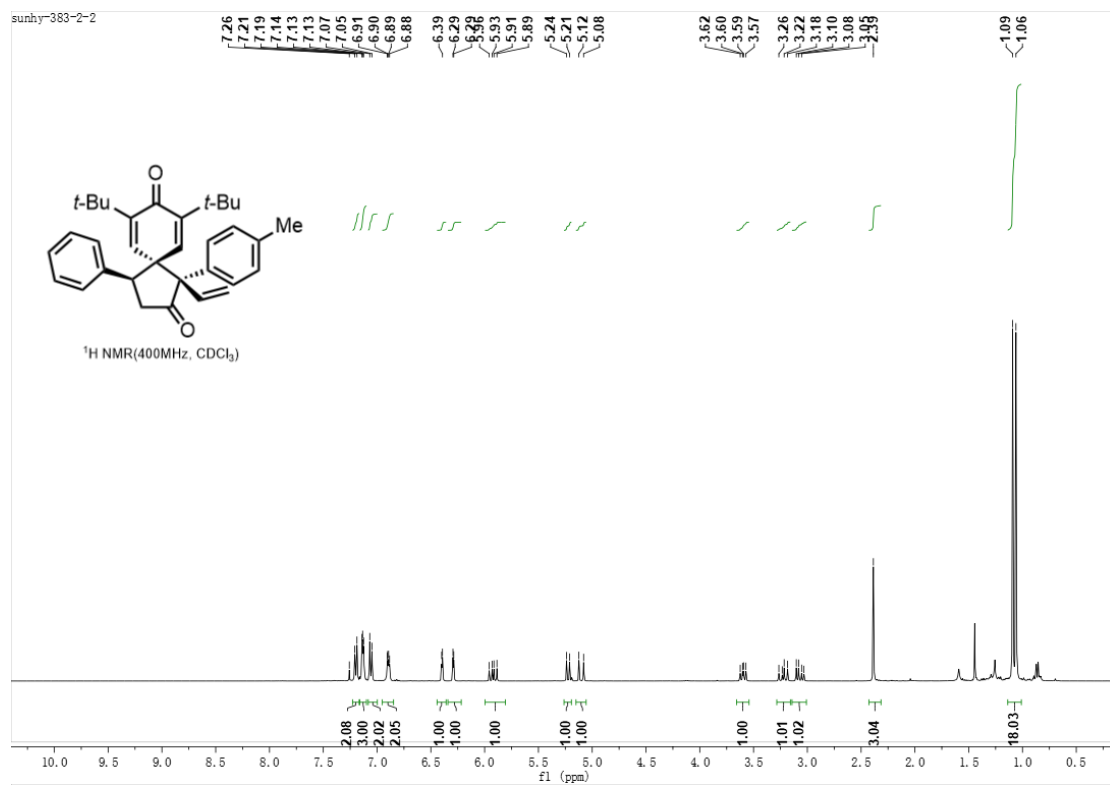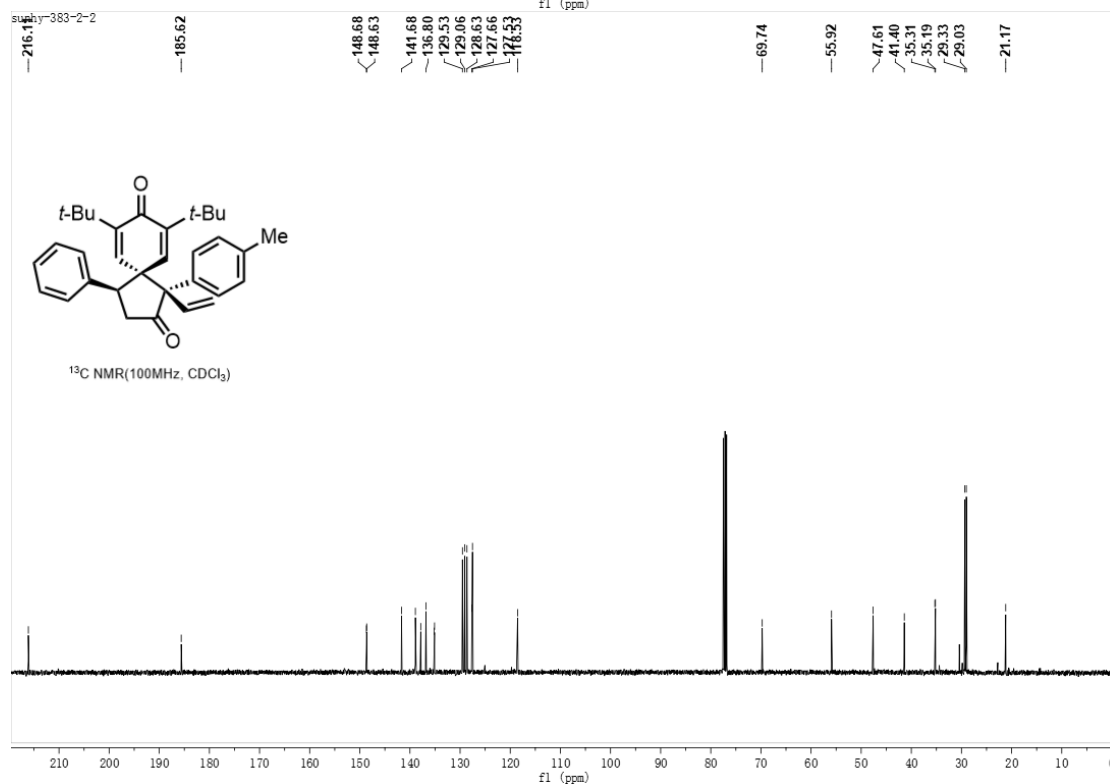

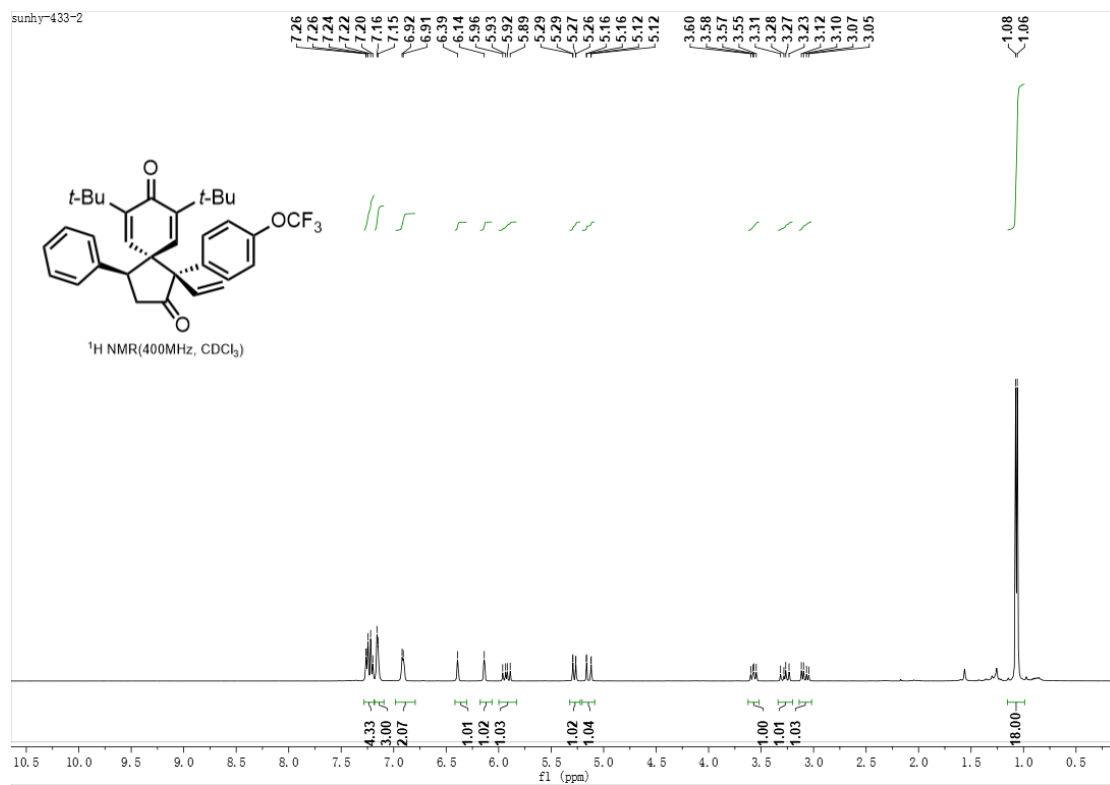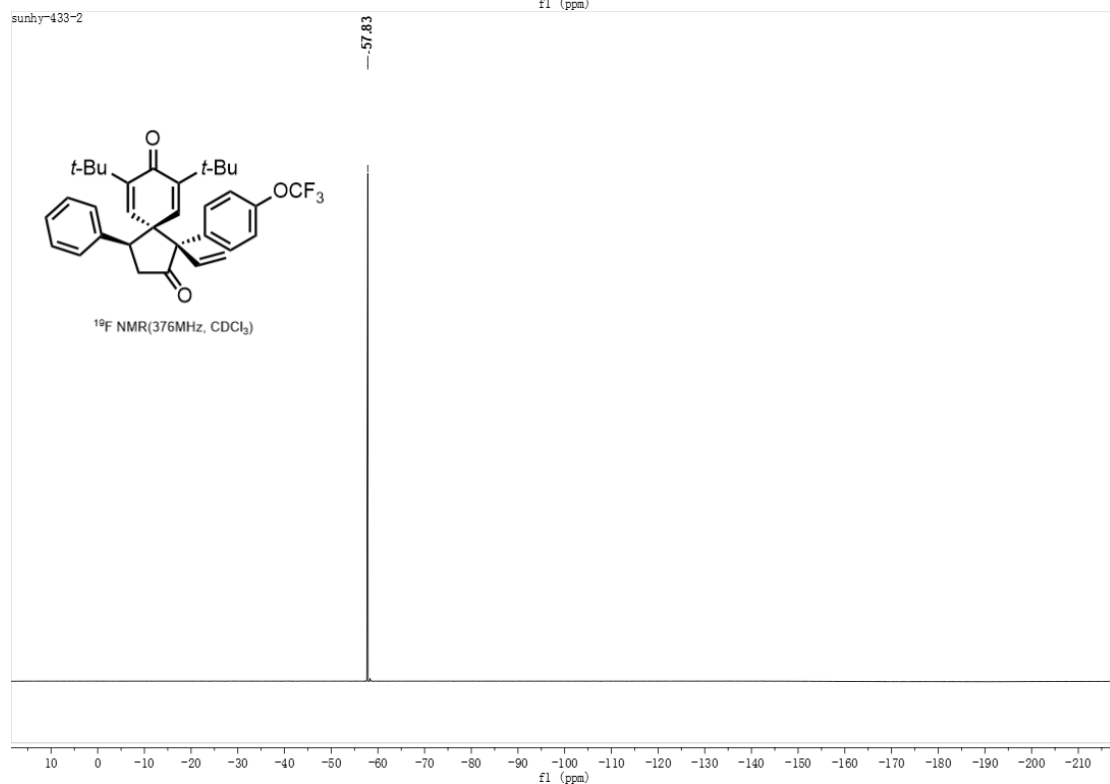



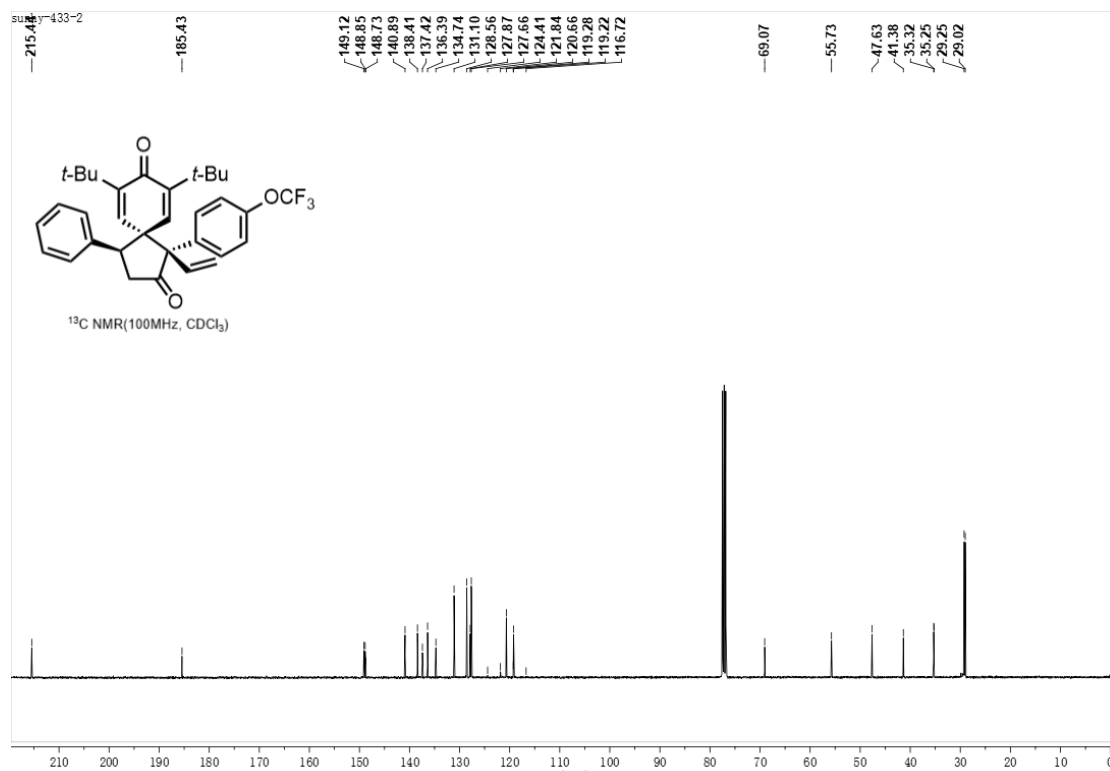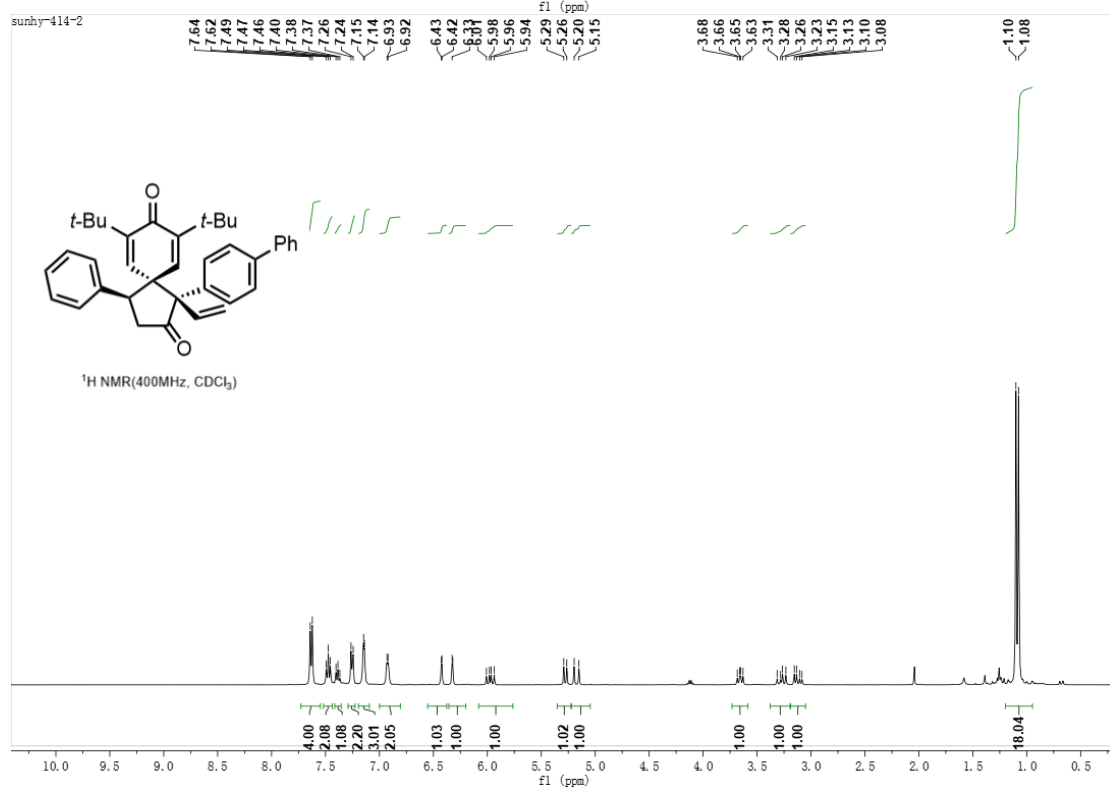

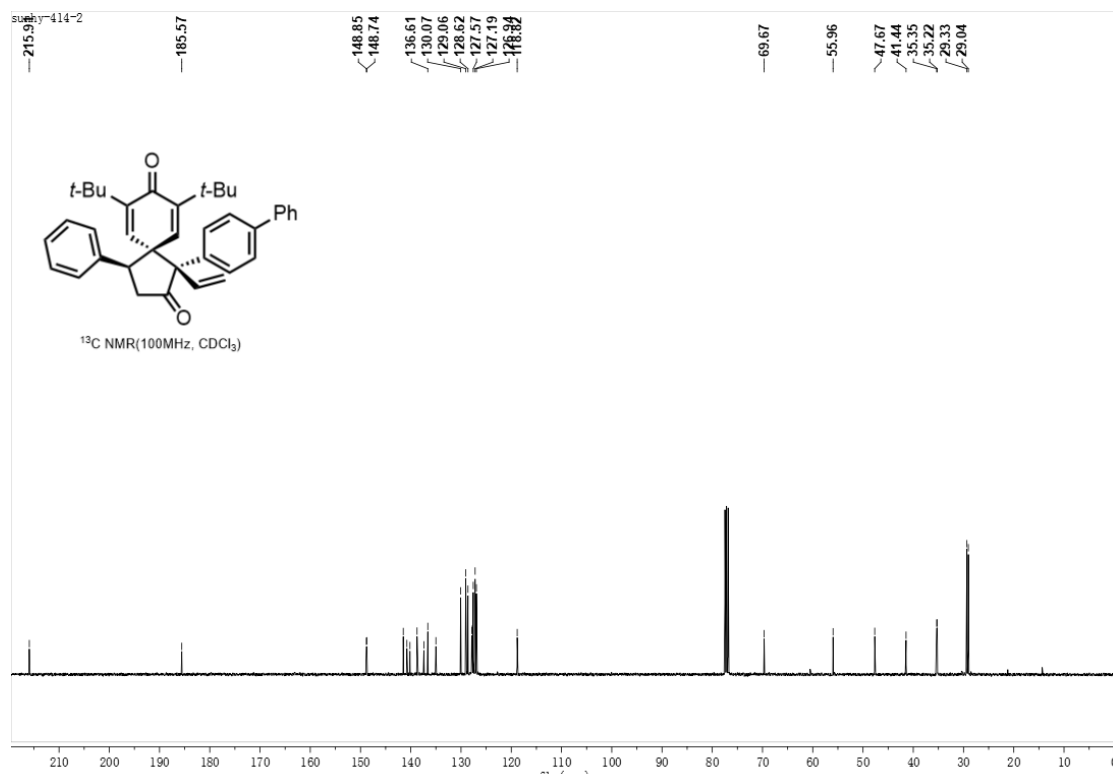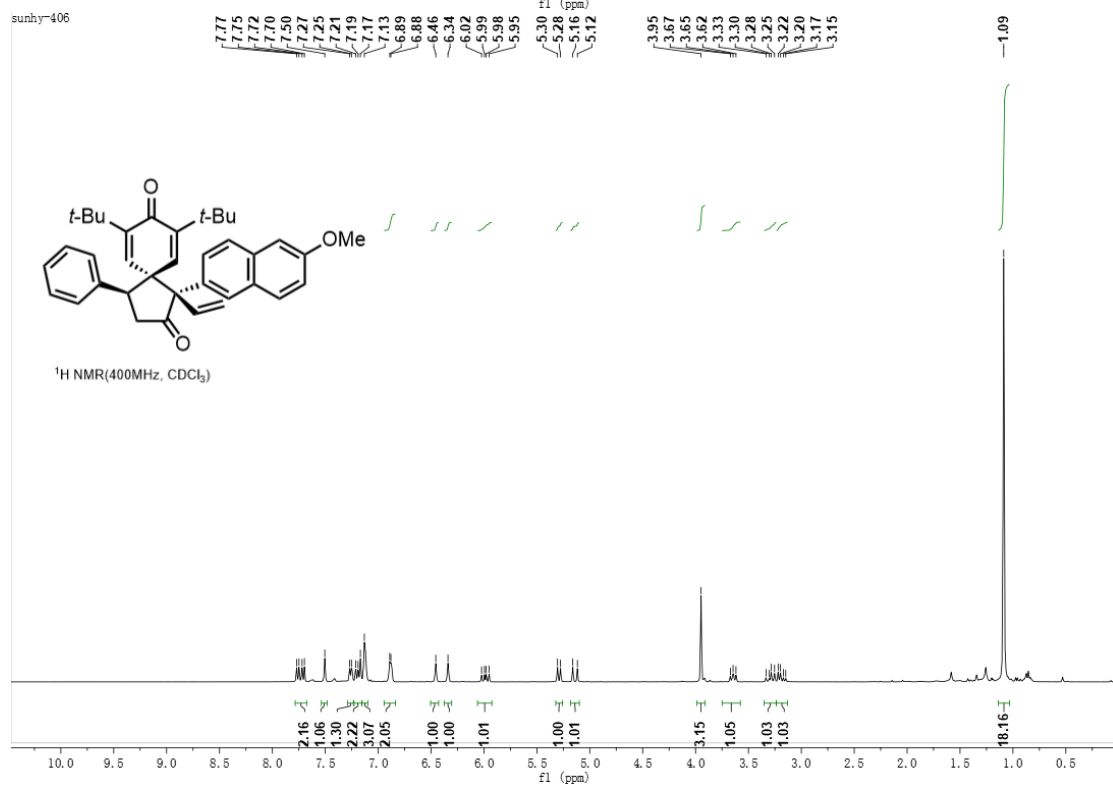

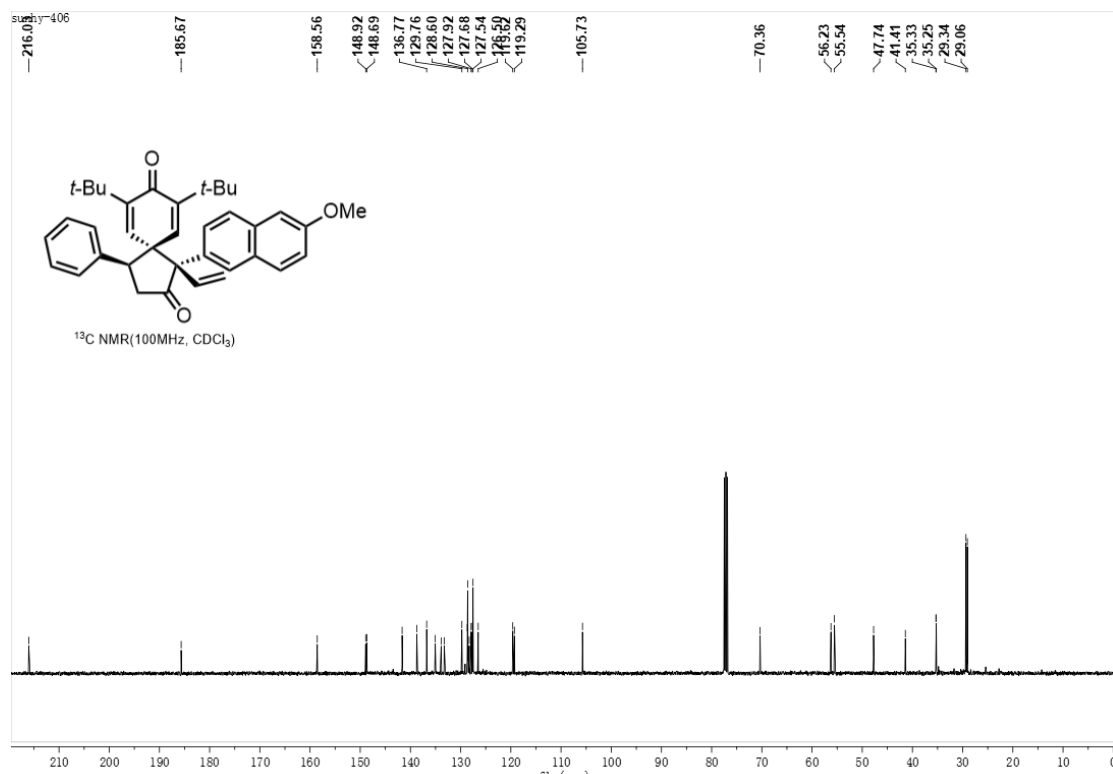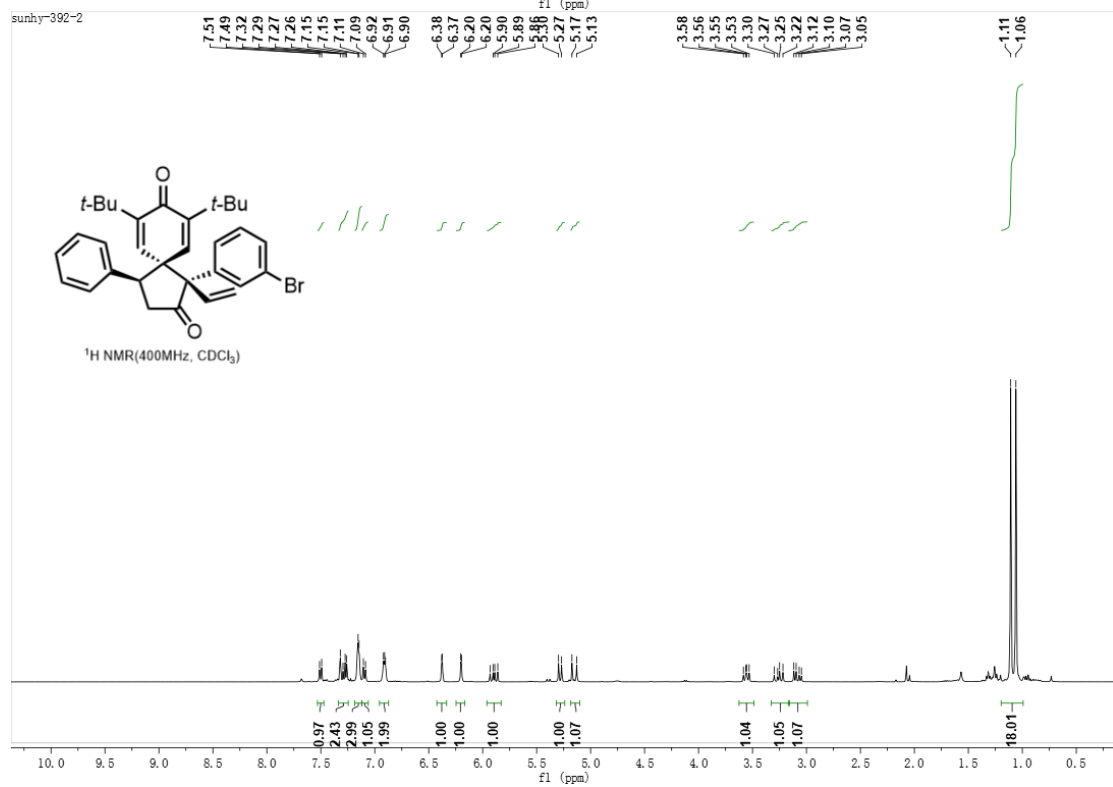

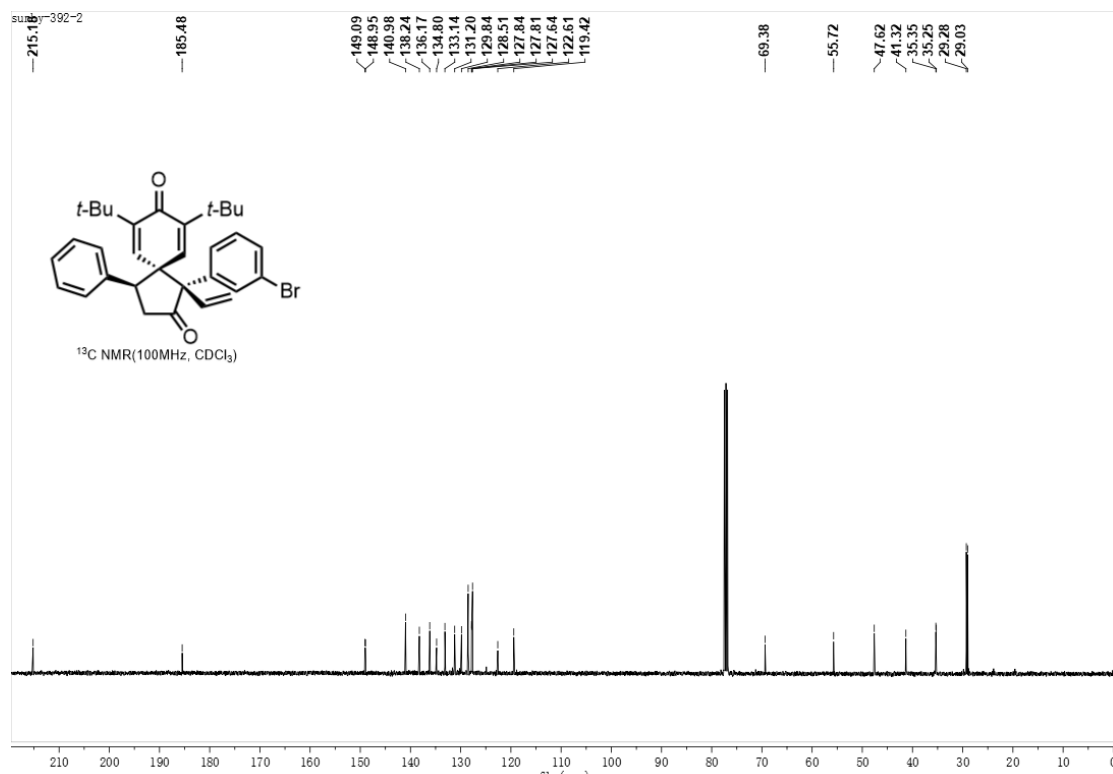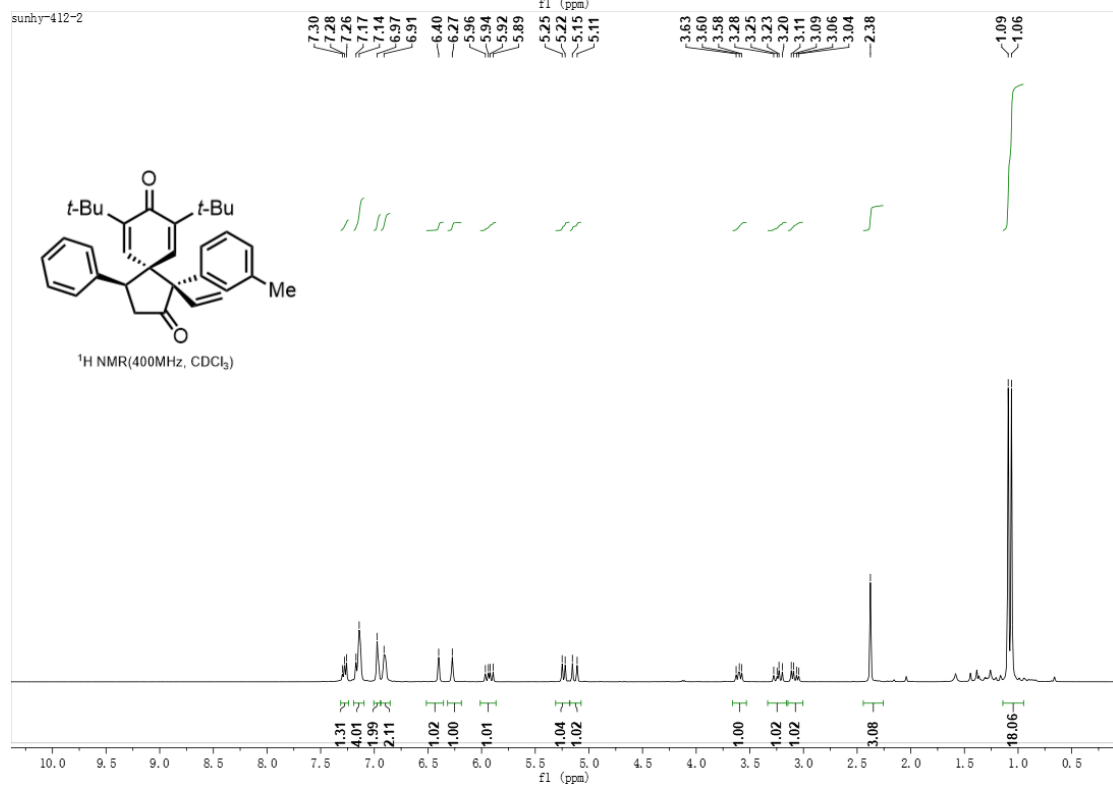

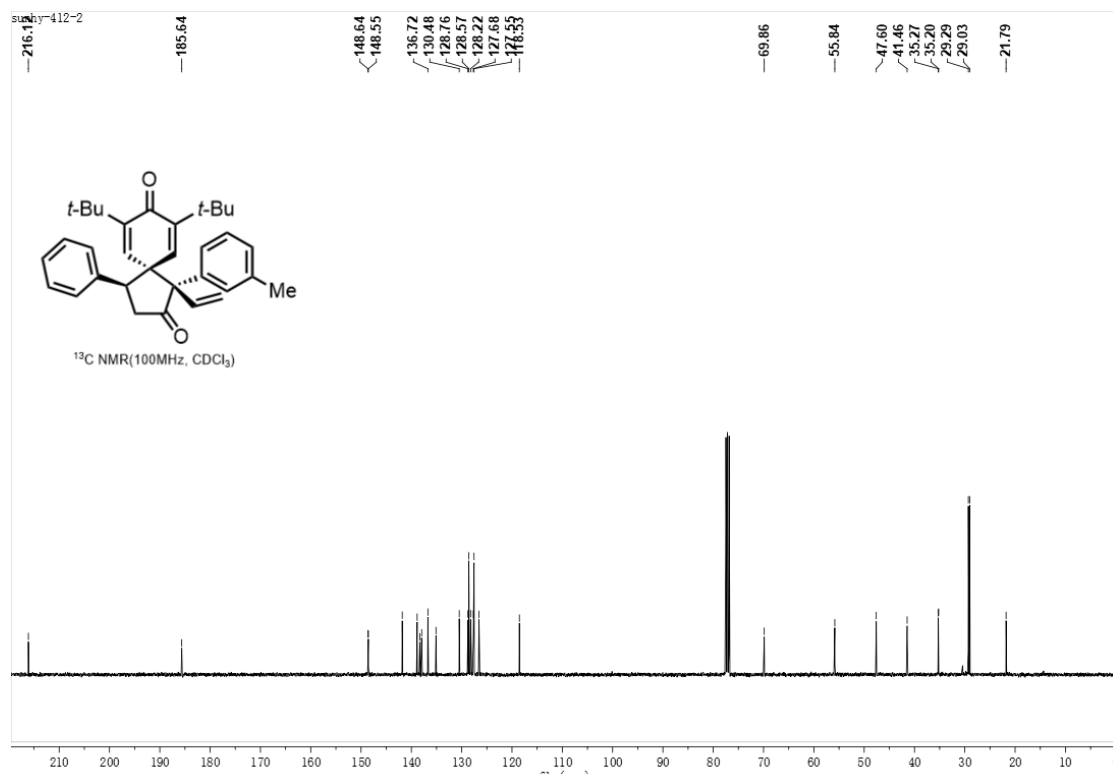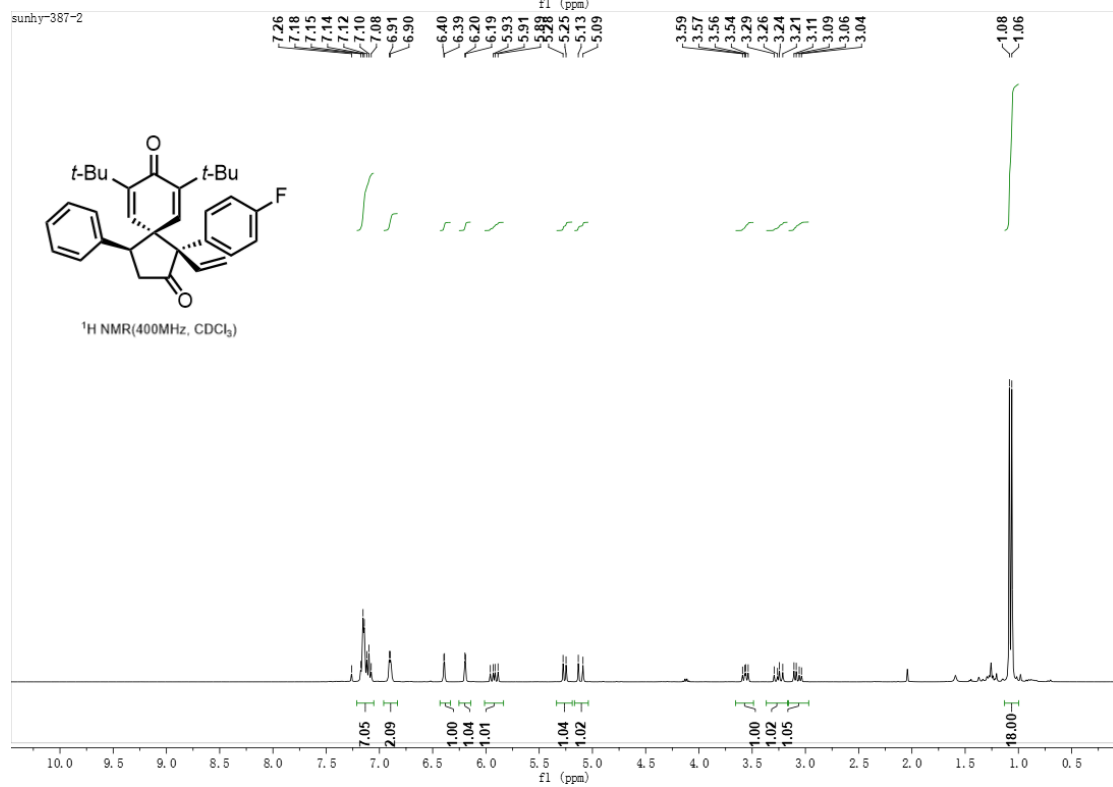

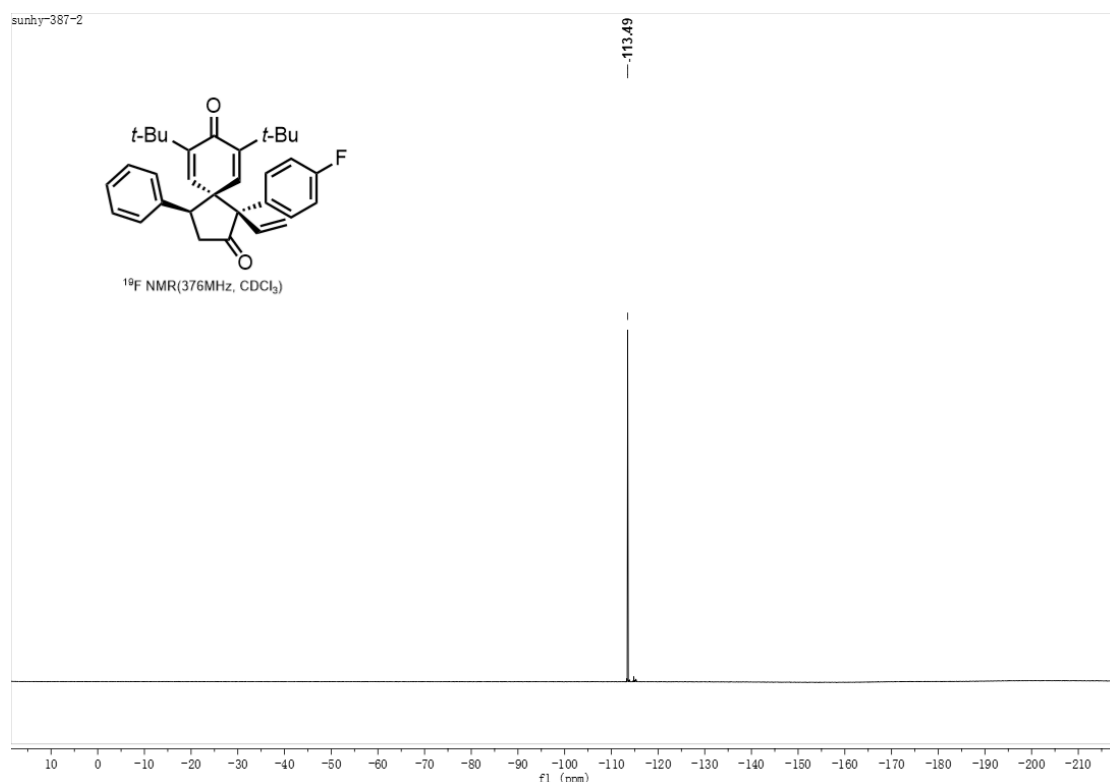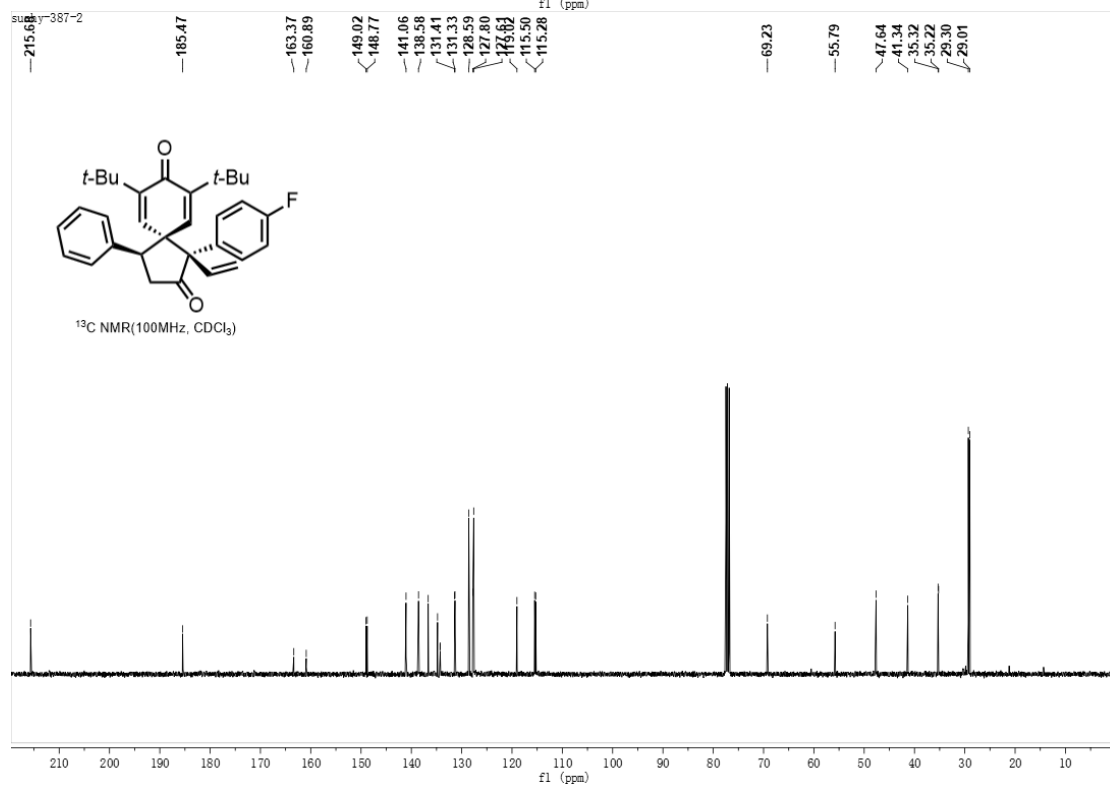

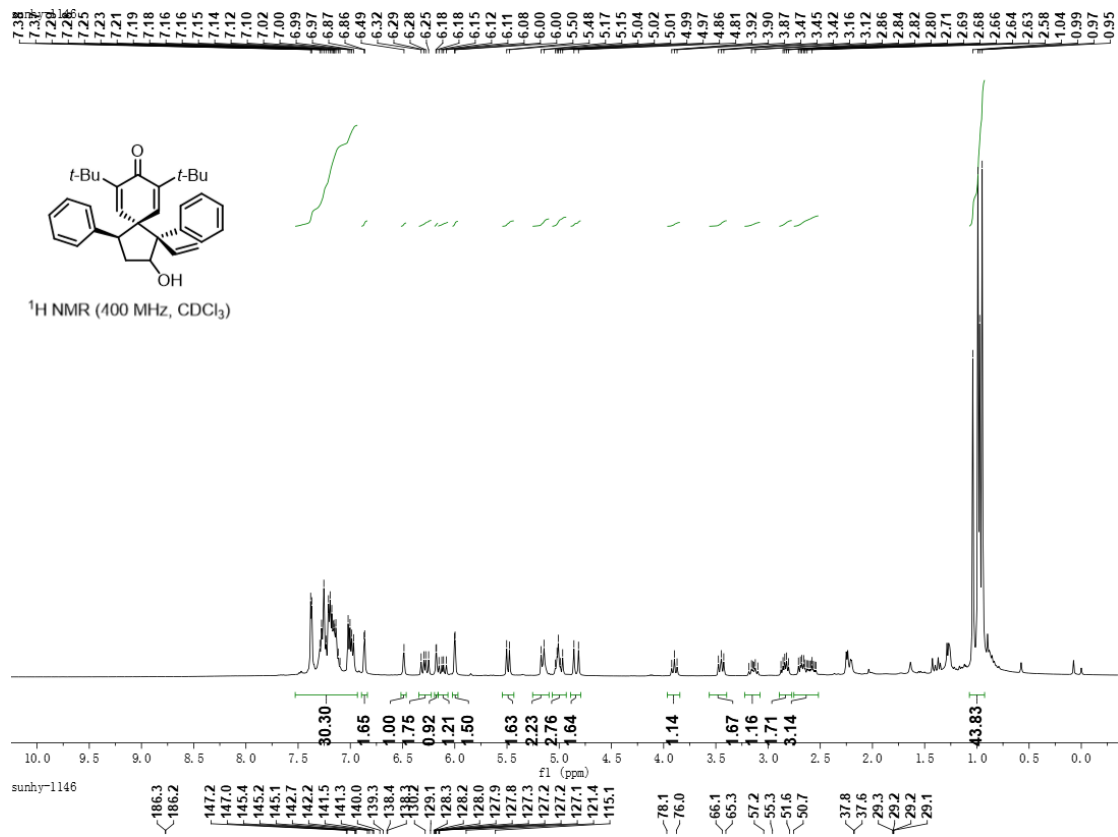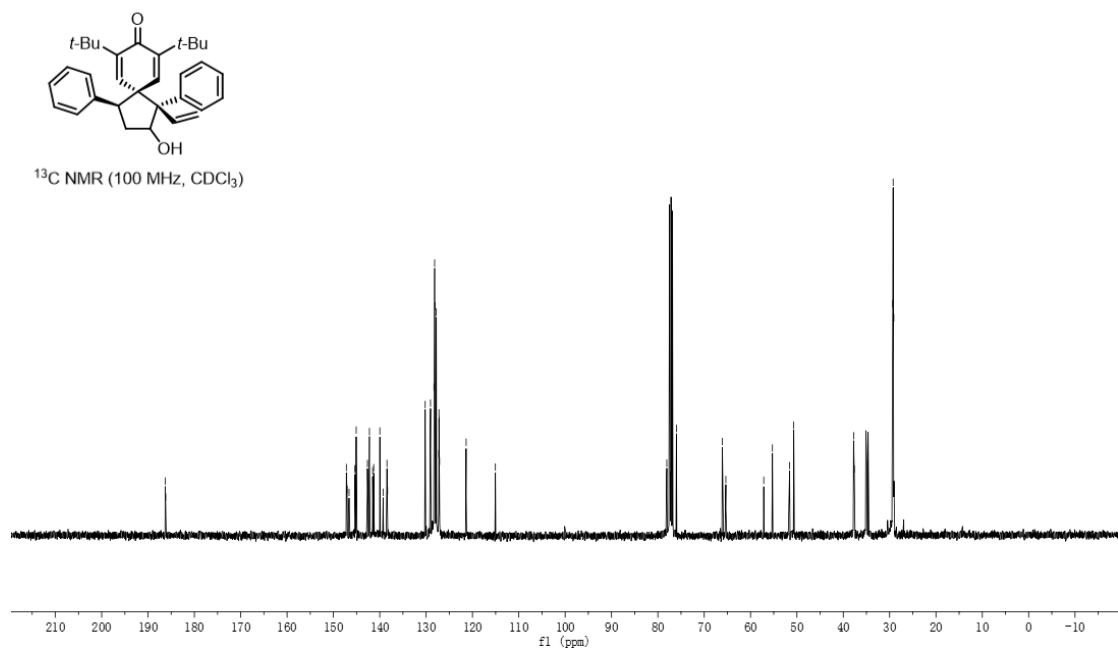

sunhy-1147

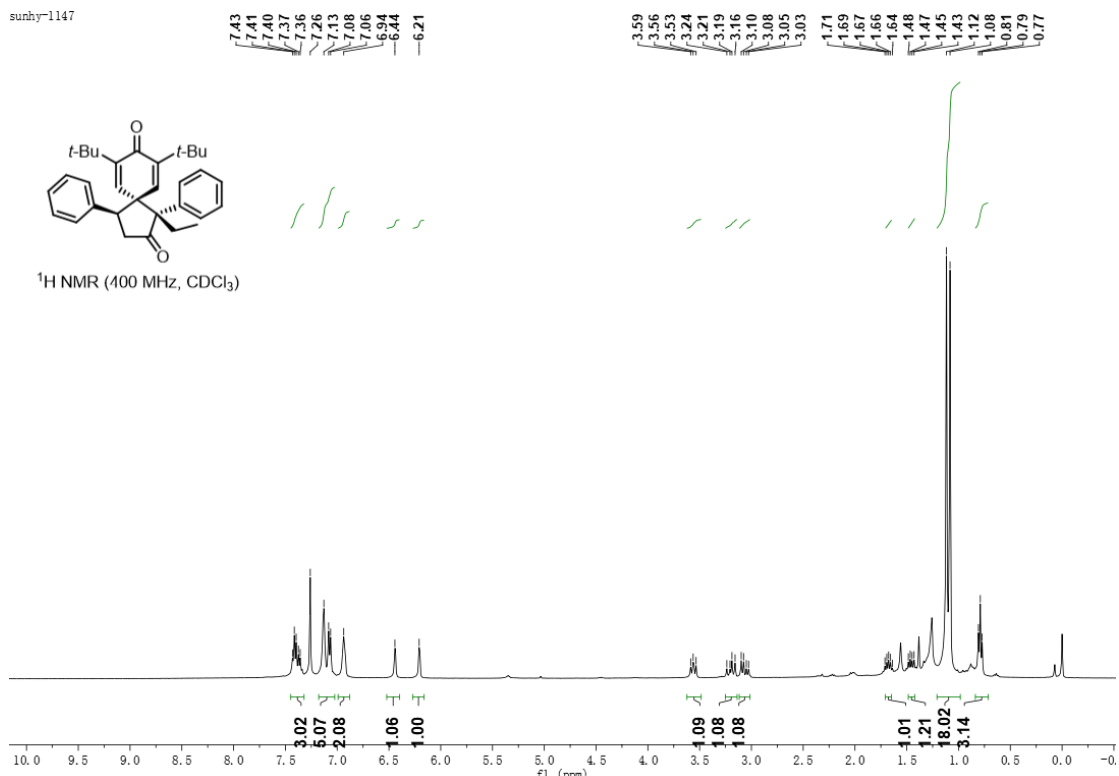

sunhy-1147

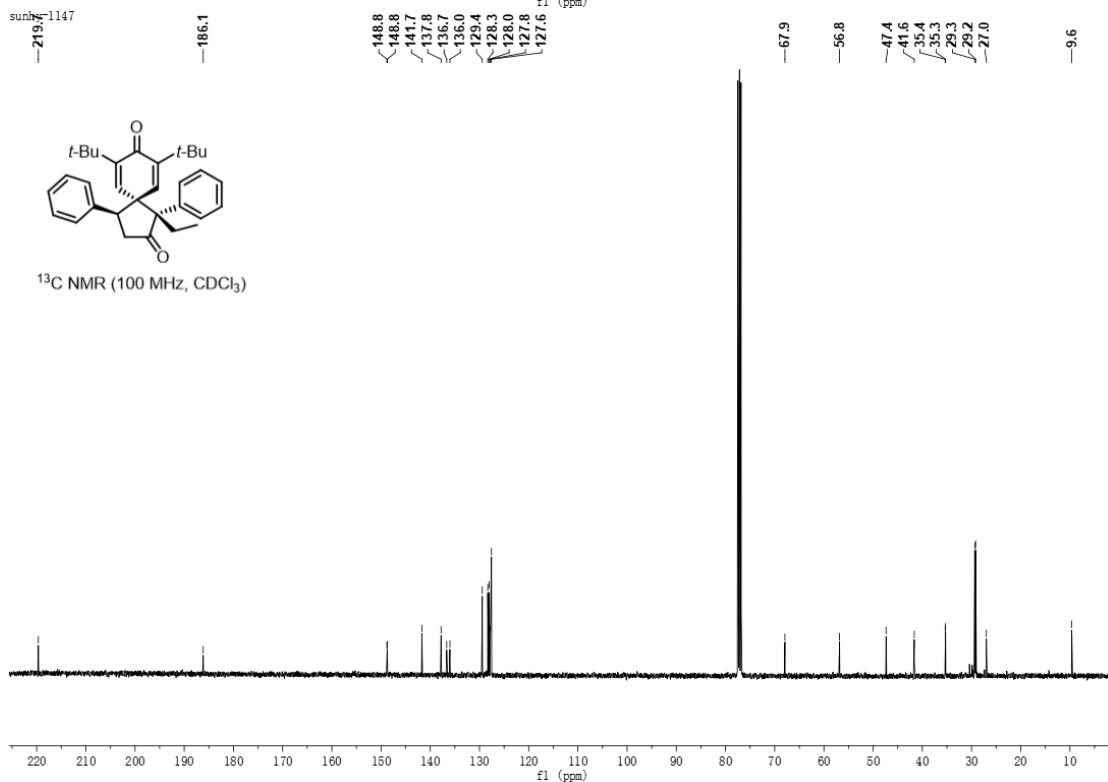



sunhy-1149

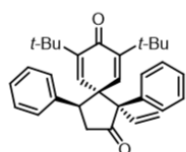

<sup>1</sup>H NMR (400 MHz, CDCl<sub>3</sub>)

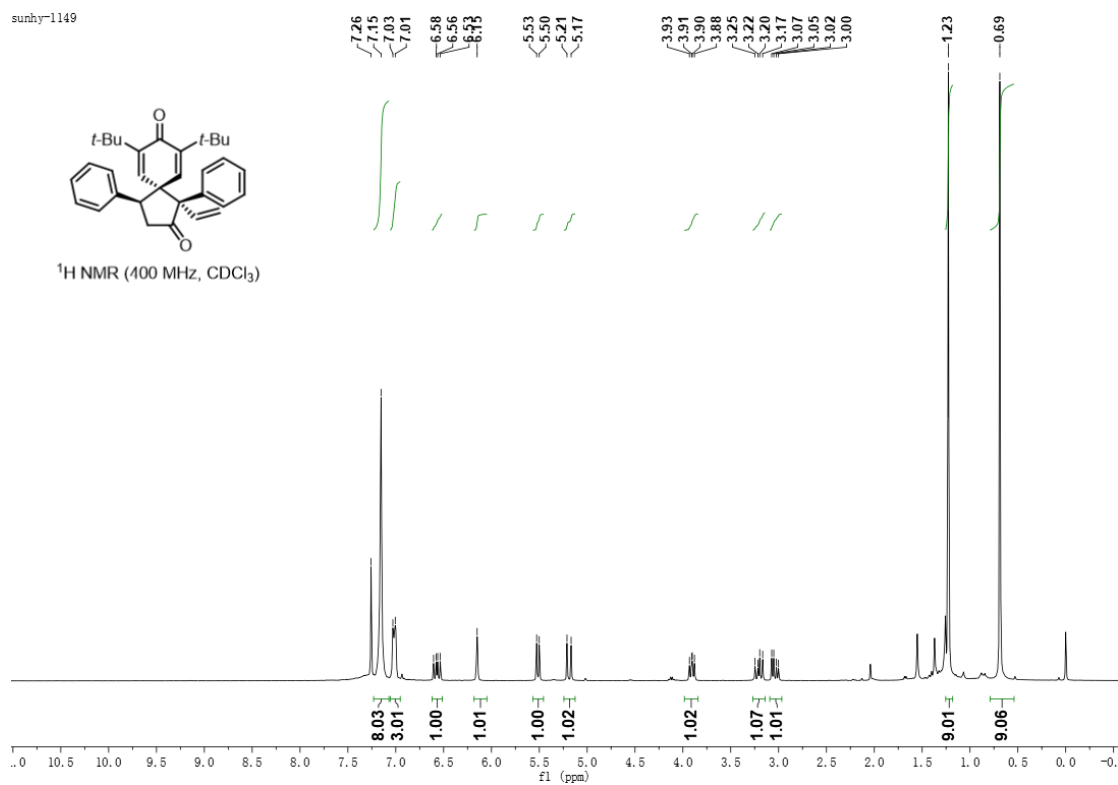

sunhy-1149

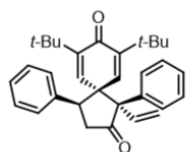

<sup>13</sup>C NMR (100 MHz, CDCl<sub>3</sub>)

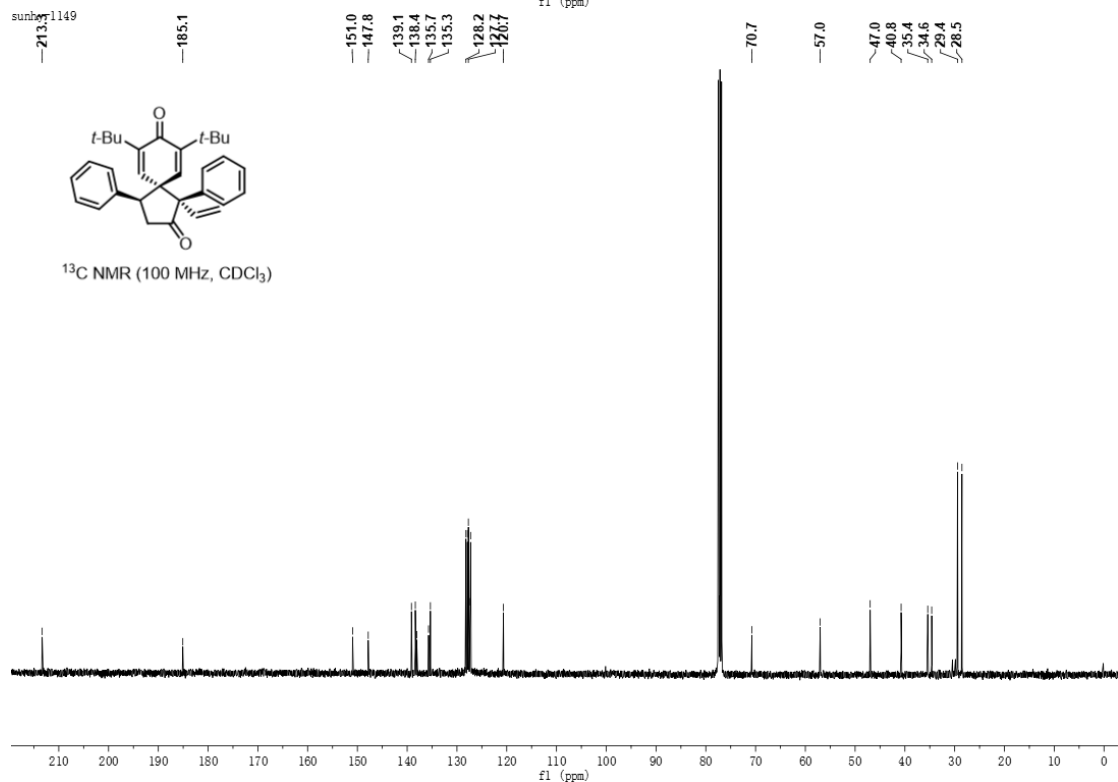

Supplement: d2qo00831a1.pdf [file d2qo00831a1.pdf]
